# Supplementary material for: A Novel Drug Combination of Mangiferin and Cinnamic Acid Alleviates Rheumatoid Arthritis by Inhibiting TLR4/NFκB/NLRP3 Activation-Induced Pyroptosis
Source: PubMed Central journal article supplement (PMC9253268; doi:10.3389/fimmu.2022.912933), 2022-06-21
Supplement: DataSheet_1.pdf [file DataSheet_1.pdf]

# **Supplementary Materials for A Novel Drug Combination of Mangiferin and Cinnamic Acid Alleviates Rheumatoid Arthritis by Inhibiting TLR4/NFκB/NLRP3 Activation-induced Pyroptosis**

## **List of Supplementary Materials**

Section 1 Preparation of Baihu-Guizhi decoction (BHGZD)

Section 2 AIA-M rat model induction

Section 3 Severity assessment of arthritis

Section 4 Measurement of mechanical-, acetone- and thermal-induced hyperalgesia

Section 5 Hematoxylin and eosin (H&E) staining

Section 6 Micro-computed tomography (micro-CT) analysis

Section 7 The significant differentially expressed genes (DEGs) screening

Section 8 Defining network topological feature set

Section 9 Identification of the bioactive compounds (BACs) contained in Baihu-Guizhi decoction (BHGZD)

Section 10 Prediction of absorbed compounds and their metabolites using *in silico* absorption distribution metabolism excretion (ADME) models

Section 11 Surface plasmon resonance (SPR) detection

Section 12 Microscale thermophoresis (MST) analysis

Section 13 Pharmacokinetic analysis

Section 14 The culture conditions of Raw264.7 and MH7A cells

Section 15 NLRP3 inflammasome activation

Section 16 Cell proliferation assay

Section 17 Flow cytometry

Section 18 Terminal deoxynucleotidyl transferase-mediated dUTP biotin nick end labeling (TUNEL) staining

Section 19 FAM-FLICA caspase-1 assay

Section 20 Immunofluorescence staining

Section 21 Characterizations and biological basis of active RA rat model

Section 22 BHGZD alleviates the disease severity in arthritis of active RA rats

Table S1 Composition of Baihu-Guizhi Decoction (BHGZD)

Table S2 The detailed information on reference standards

Table S3 The antibodies used for western blotting analysis

Table S4 The significant differentially expressed genes (DEGs) identified by microarray analysis

Table S5 The significant differentially expressed genes (DEGs) identified by mRNA Sequencing (mRNA-Seq)

Table S6 The topological feature of nodes in the interaction network of RA-candidate-marker gene-BHGZD-effective gene

Table S7 The chemical profiling of Baihu-Guizhi Decoction (BHGZD) using UFLC-Q-TOF-MS/MS system.

Table S8 13 chemical compounds were quantitatively determined using UFLC-Q-TOF-MS/MS system

Table S9 The absorption distribution metabolism excretion (ADME) information on 19 bioactive compounds (BACs) included in Baihu-Guizhi Decoction (BHGZD)

Table S10 Molecular docking results by Autodock Vina

Figure S1 Total ion chromatogram for sera in normal control group after the treatment of Baihu-Guizhi decoction (BHGZD) by UHPLC-QTRAP-MS/MS system.

Figure S2 Micro-computed tomography (micro-CT) analysis and pathological changes in the liver, kidney, spleen, and thymus of different groups using hematoxylin and eosin (H&E) staining based on AIA-M rats. And the cell viability on Raw264.7 cells with the treatment of MG and CA tested using cell counting kit-8 (CCK8) assay.

## **Section 1 Preparation of Baihu-Guizhi decoction (BHGZD)**

BHGZD was prepared according to the original composition of this formula recorded in Chinese Pharmacopoeia 2020 edition (**Supplementary Materials Table S1**), which were purchased from Beijing Tongrentang Co., Ltd (Beijing, China). Five crude drugs [*Gypsum Fibrosum* (60g), *Anemarrhenae Rhizoma* (15g), *Cinnamomi Ramulus* (10g), *Oryza Semen* (30g), and *Glycyrrhizae Radix et Rhizoma* (5g)] were separately soaked with pure water for 1h. Then, *Gypsum Fibrosum* was added to 1200 mL (1:10, g/v) of boiling pure water and boiled for 30 min. The herb mixture was added and boiled for 30min. The filtrates were collected, and the residues were decocted in 600mL (1: 5, g/v) of pure water for 20min. The filtrates from each decoction were combined and concentrated to 2g/mL using rotary evaporator. The obtained BHGZD was kept at -20 °C for preparation. Combined and concentrated the filtrate under reduced pressure and dried out in 70°C oven overnight to obtain BHGZD powder.

## **Section 2 AIA-M rat model induction**

Induction of AIA model was performed as previous reported (1-3), and AIA-M rat model was established to simulate the pathological changes and characteristics of active RA after AIA model induction. Briefly, male Lewis rats were injected intradermally at the base of tail with 10mg/mL *M tuberculosis* H37 Ra (Difco, BD company, New Jersey, US) suspended in liquid paraffin (Freund's complete adjuvant, CFA). From the day of primary immunization, male Lewis rats were kept in the artificial climate box (production license no. RXZ-380A-LED) for 2h daily with certain wind velocity (6m/s), temperature (37°C) and

humidity (90%) for a period of 15 days.

### **Section 3 Severity assessment of arthritis**

Rats were observed once every day after primary immunization. Arthritis severity was evaluated by arthritis incidence, the diameter of limb, arthritis score, and arthritis surface temperature, which were performed by two independent, blinded observers. The arthritis score was the total of the scores for all 4 limbs (maximum possible arthritis score 80). Arthritis incidence values are the number positive/total number in groups for 11 days consecutively. The diameter of limb was measured with a vernier caliper.

The temperature of the articular surface, awarded to the left hind paw of male Lewis rats, was measured using an infrared thermal imager (TESTO-875, Testo AG, Schwarzwald, Germany) once a day from the day when the first signs of inflammatory were observed.

### **Section 4 Measurement of mechanical-, acetone- and thermal-induced hyperalgesia**

Mechanical-induced hyperalgesia was assessed with Von Frey filaments by using Dixon's up-and-down paradigm (4). The rats were habituated in individual clear boxes on a wire-mesh platform, to allow access to the ventral surface of the hind paws, and mechanical hypersensitivity was assessed by the sensitivity to the application of von Frey hairs (Stoelting Co., Chicago, USA). The von Frey filaments (1.4~180g) were presented perpendicularly to the plantar surface of the injected paw and held in this position for 2~3s with enough force to cause a slight bend in the filament. Positive responses included an abrupt withdrawal of the hind paw or flinching behaviors immediately following removal of the stimulus, and 50% paw withdrawal threshold was determined at 0, 5, 10, 15, 25<sup>th</sup> day

after BHGZD administration (5), respectively.

The rats were acclimatized to an apparatus consisting of individual perspex boxes. With the aid of syringe (1mL), 500 $\mu$ L acetone was sprayed gently from a short distance to the middle of the plantar surface of hind paw. The acetone quickly spread over the proximal half of the plantar surface of the foot. The amount of time that rats were licking and/or shaking the hind paw was recorded during 5min after acetone application and was used as an index of nocifensive response for cold hypersensitivity (6). The licking and/or shaking time was measured at 0, 5, 10, 15, 25<sup>th</sup> day after BHGZD administration, respectively.

For thermal-induced hyperalgesia, the rats were placed for 30min in an apparatus consisting of individual perspex boxes with Hargreaves radiant heat apparatus (Ugo Basile Srl, Comerio VA, Italy) and an infrared radiant heat (40W) source was directed to middle part of the plantar surface of the hind paw. A cutoff time of 20s was set to prevent tissue injury. The paw withdrawal latency was measured at 0, 5, 10, 15, 25<sup>th</sup> day after BHGZD administration, respectively. The interval of the paw withdrawal latency measurement was 5min (7).

## **Section 5 Histology**

Hematoxylin and eosin (H&E) staining was conducted according to routine protocols. Briefly, after deparaffinization and rehydration, tissue sections were stained with hematoxylin solution (ZSGB-BIO, China) for 5min followed by 5 dips in 1% acid ethanol (1% HCL in 75% ethanol) and then rinsed in distilled water. Then the sections were stained with eosin solution (ZSGB-BIO, China) for 3min and followed by dehydration with graded

alcohol and clearing in xylene. Images were captured and analyzed by K-Viewer software (version 1.5.3.1; KFBIO; <http://www.kfbio.cn>).

Samples were cut into 5- $\mu$ m-thick longitudinally oriented sections and processed for H&E, Masson trichrome staining, and Safranin O-Fast Green staining.

## **Section 6 Micro-computed tomography (micro-CT) analysis**

To quantitatively evaluate bone formation within the defects, the specimens were scanned using a micro-CT instrument (GE healthcare, USA) at a resolution of 45 $\mu$ m. The X-ray settings were standardized to 80kVp and 450 $\mu$ A with an exposure time of 400ms. The 3D images were reconstructed to analyze the new bone formation by micro-CT analysis software (Micro View <sup>TM</sup>, Version 2.2). The cylinder region of interest (ROI) was quantified by the values of the bone mineral density (BMD), tissue mineral density (TMD), bone volume to tissue volume (BV/TV), bone volume/tissue volume (BS/BV), the trabecular thickness (Tb.Th.), and trabecular separation (Tb.Sp.).

## **Section 7 The significant differentially expressed genes (DEGs) screening**

### **1) DEGs in the synovium**

Synovium of joint of Control, AIA-M model and BHGZD treatment rats were dissected under aseptic conditions, fixed immediately in Trizol (n=3 per group), taking into consideration the comprehensive factors such as the arthritis score and pain sensitivity of AIA-M rats.

#### **RNA extraction and purification**

Total RNA was extracted using TAKARA RNAiso Plus#9109 following the manufacturer's

instructions and checked for a RIN number to inspect RNA integrity by an Agilent Bioanalyzer 2100 (Agilent technologies, Santa Clara, CA, US). Qualified total RNA was further purified by RNeasy micro kit (Cat#74004, QIAGEN, GmbH, Germany) and RNase-Free DNase Set (Cat#79254, QIAGEN, GmbH, Germany).

#### RNA amplification and labeling

Total RNA was amplified and labeled by Low Input Quick Amp Labeling Kit, One-Color (Cat.# 5190-2305, Agilent technologies, Santa Clara, CA, US), following the manufacturer's instructions. Labeled cRNA were purified by RNeasy mini kit (Cat.# 74106, QIAGEN, GmbH, Germany).

#### Microarray hybridization

Each slide was hybridized with 1.65 $\mu$ g Cy3-labeled cRNA using Gene Expression Hybridization Kit (Cat.# 5188-5242, Agilent technologies, Santa Clara, CA, US) in Hybridization Oven (Cat.# G2545A, Agilent technologies, Santa Clara, CA, US), according to the manufacturer's instructions. After 17h hybridization, slides were washed in staining dishes (Cat.# 121, Thermo Shandon, Waltham, MA, US) with Gene Expression Wash Buffer Kit (Cat.# 5188-5327, Agilent technologies, Santa Clara, CA, US), followed the manufacturer's instructions.

#### Data acquisition

Slides were scanned by Agilent Microarray Scanner (Cat#G2565CA, Agilent technologies, Santa Clara, CA, US) with default settings, Dye channel: Green, Scan resolution=3 $\mu$ m, PMT 100%, 20bit. Data were extracted with Feature Extraction software 10.7 (Agilent technologies, Santa Clara, CA, US). Raw data were normalized by Quantile algorithm,



limma packages in R.

## **2) DEGs in the whole blood cells**

Whole blood cell of Control, AIA-M model and BHGZD treatment rats were collected and isolated (n=5 per group), taking into consideration the comprehensive factors such as the arthritis score and pain sensitivity of AIA-M rats.

Total RNA was isolated using RNeasy mini kit (Qiagen, Germany). Paired-end libraries were synthesized by using the TruSeq™ RNA Sample Preparation Kit (Illumina, CA, USA) following TruSeq™ RNA Sample Preparation Guide. Briefly, the poly-A containing mRNA molecules were purified using poly-T oligo-attached magnetic beads.

Following purification, the mRNA is fragmented into small pieces using divalent cations under 94°C for 8 min. The cleaved RNA fragments are copied into first strand cDNA using reverse transcriptase and random primers. This is followed by second strand cDNA synthesis using DNA Polymerase I and RNase H. These cDNA fragments then go through an end repair process, the addition of a single 'A' base, and then ligation of the adapters. The products are then purified and enriched with PCR to create the final cDNA library. Purified libraries were quantified by Qubit® 2.0 Fluorometer (Life Technologies, USA) and validated by Agilent 2100 bioanalyzer (Agilent Technologies, USA) to confirm the insert size and calculate the mole concentration. Cluster was generated by cBot with the library diluted to 10pM and then were sequenced on the Illumina NovaSeq 6000 (Illumina, CA, USA).

The library construction and sequencing were performed at Shanghai Sinomics Corporation.

## **Section 8 Defining network topological feature set**

For each node  $i$  in interaction network, we defined three measures for assessing its topological property: (1) "Degree" is defined as the number of links to node  $i$ ; (2) "Betweenness" is defined as the number of shortest paths between pairs of nodes that run through node  $i$ . (3) "Closeness" is defined as the inverse of the farness which is the sum of node  $i$  distances to all other nodes. The Closeness centrality can be regarded as a measure of how long it will take to spread information from node  $i$  to all other nodes sequentially. Degree, node betweenness and closeness centralities can measure a node's topological importance in the network. The larger a node's degree/betweenness/closeness centrality is, the more important the node is in the interaction network (8).

## **Section 9 Identification of the bioactive compounds (BACs) contained in Baihu-Guizhi decoction (BHGZD)**

### **1) Preparation of BHGZD samples**

Serum sample (100 $\mu$ L) was precipitated with 200 $\mu$ L of pre-freezing acetonitrile (containing D4-naringin 50ng/mL, IS). After vortexed for 2min, all samples subsequently centrifuged at 15000rpm for 20min at 4 $^{\circ}$ C. The supernatants were subjected for qualitative and quantitative analysis.

### **2) UFLC-Q-TOF-MS/MS conditions**

Chemical analysis was conducted on a connected system of UFLC XR (Shimadzu Corp., Japan)-hybrid triple quadruple time-of-flight mass spectrometer (Triple TOF<sup>TM</sup> 5600<sup>+</sup>, AB

Sciex, Forster City, USA) with electrospray ionization source (ESI). Kinetex C18 column (Phenomenex, 3.0×150 mm, 2.6µm, 100Å) was used to perform chromatographic separation with a flow rate of 0.3mL/min at 40°C. A linear gradient program with mobile phase system including solvent A (deionized water with 0.1% formic acid, v/v) and solvent B (methanol) was described in details: solvent B (5~95%) for 40min, isocratic eluted at 95% B for 5min, 95%~5% B (40-45min), followed a post-run of 2min to equilibrate the system.

The instrumental settings of Q-TOF-MS/MS were described in the previous study (9). Samples were analyzed in both positive and negative ionization modes with scanning mass-to-charge (*m/z*) range from 50 to 1500. Data was collected in information-dependent acquisition (IDA) mode and analyzed by PeakView® 2.2 software (AB Sciex, Foster City, CA, USA). Chemical identifications were based on reference standards and mass spectral library (Natural Products HR-MS/MS Spectral Library, Version 1.0, AB Sciex, Forster City, USA).

### **Section 10 Prediction of absorbed compounds and their metabolites using in silico absorption distribution metabolism excretion (ADME) models**

Structural information (\*.mol or \*.sdf files) relating to the bioactive components (identified by UFLC-Q-TOF-MS/MS) were downloaded from ChemSpider (<http://www.chemspider.com/>). ADME evaluation of these compounds was carried out using ACD/Percepta software 5.07 (ACD/Labs, Toronto, Canada), including the passive intestinal permeability of Caco-2 module and the pharmacokinetic explorer module to predict their oral bioavailability. The apparent permeability coefficient (*P<sub>app</sub>*) of one

compound was greater than  $9.0 \times 10^6 \text{ cm/s}$  and 40% which indicated drug-like characteristics.

### **Section 11 Surface plasmon resonance (SPR) assay**

SPR binding assays were analyzed with Biacore 8K (Biacore, Cytiva). Materials and reagents used in SPR assays were purchased from Cytiva. The histidine-tagged AKT1 (Cat No. ab116412, Abcam, Cambridge, UK) was immobilized on the surface of Carboxymethylated (CM5) sensor chip through the standard amino coupling method. The carboxyl groups of the sensor surface were activated by injection of a solution containing 0.2M N-ethyl-N9-(3-dimethylaminopropyl) carbodiimide (EDC) and 0.05M N-hydroxysuccinimide (NHS), AKT1 in 10mM sodium acetate buffer was then injected at a flow rate of  $10 \mu\text{L}/\text{min}$  to couple to the sensor surface, and the remaining active sites in the flow cell were finally blocked by 1M ethanolamine (EA). Sensor chips were primed twice with degassed physiological running buffer (PBS buffer). A reference flow cell was activated and blocked in the absence of AKT1. In the direct binding, the AKT1 immobilization level was fixed at 9000RU, and then different concentrations of AKT1 in the corresponding buffer containing 5%DMSO (v:v) were serially injected into the channel to evaluate binding affinity. MG was dissolved in DMSO, and diluted to a concentration series using PBS buffer, and then injected. The Biacore 8K evaluation software 2.0 (GE Healthcare) was used for calculating the related  $K_D$  value.

### **Section 12 Microscale thermophoresis (MST) analysis**

The binding affinity between recombinant TLR4 (Cat No. ab233665, Abcam, Cambridge,

UK) and CA contained in BHGZD was measured by NanoTemper Monolith NT.115 instrument (NanoTemper Technologies, Germany). TLR4 was firstly adjusted to a concentration of 10 $\mu$ M and then labeled with Monolith NT.115 Protein Labeling Kit RED-NHS (NanoTemper Technologies, Germany) according to the protocol of the manufacture. After the protein labeling experiment was completed, TLR4 was diluted with binding buffer (20mM HEPES, pH 7.4, 100mM NaCl and 0.005% Tween 20) to ensure that the fluorescence intensity of TLR4 during the MST assay was about 500 RU. In this assay, the final concentration of TLR4 after mixing with CA was 20nM. In the following, CA were serially diluted in binding buffer (16 points, 1:2 dilutions, from 0.5mM), then mixed and incubated with an equal volume of the diluted TLR4 at room temperature for 3, 8, and 16h. After incubation, the samples were loaded into the premium treated capillaries and measured in NanoTemper Monolith NT.115 instrument (NanoTemper Technologies, Germany). The  $K_D$  value was fitted by NanoTemper Monolith affinity software (NanoTemper Technologies, Germany) using 1:1 binding mode.

### **Section 13 Pharmacokinetic analysis**

To detect the pharmacokinetics parameter of MG and CA, respectively, after oral administration of BHGZD, ultra-fast liquid chromatography coupled with triple quadrupole-linear ion trap composite mass spectrometry (UHPLC-QTRAP-MS/MS) system was performed. The quantitative analysis for MG and CA were approved by the Guidance for Bioanalytical Method Validation issued by Chinese Pharmacopoeia Commission in 2020. The pharmacokinetic parameters were calculated by Drug and Statistic software (Shanghai, China).

## 1) Collection of blood samples

Male Lewis rats (n=6, 6-8 weeks-old, 200±20g in weight) were purchased from Beijing Vital River Laboratory Animal Technology Co., Ltd. (SCCK 2016-0006, Beijing, China; n=3 per group, including normal control group and normal control+BHGZD treatment group). Diet was prohibited for 12h before the experiment but water was freely available. Blood samples (~0.25mL) were collected from the retinal venous plexus into heparinized 1.5mL polythene tubes before administration and 0, 0.25, 0.5, 1, 2, 3, 4, 6, 8, 12 and 24h after administration of BHGZD. The plasma samples were obtained after centrifuging at 12000rpm for 15min, and stored at -20°C prior to analysis.

## 2) UHPLC-QTRAP-MS/MS conditions

Quantification analysis were performed on an ultra-high-performance liquid chromatography (Shimadzu Corp., Japan) tandem ion trap quadrupole QTRAP 6500 plus mass spectrometry (AB Sciex, USA). Chromatographic separation was conducted using a Poroshell 120 EC-C18 column (3.0×50mm, 2.7µm) at 40°C. The mobile phase was consisted of 0.1% formic acid–water (v/v, A) and methanol (B) and elution program were: 0-0.5min, 20%-40%B; 0.5-1.0min, 40%B; 1.0-3.5min, 40%-90%B; 3.5-5.0min, 90%B; 5.0-5.3min, 90%-20%B; 5.3-8.0min, 20%B.

Mass spectrometry detector were conducted in negative mode and the detecting parameters were set as follows: curtain gas, 35 psi; collision gas, medium; ionspray voltage, 4500 V; temperature, 550°C; ion source gas 1 and 2, 55psi. Quantitative ion pairs were optimized for MG:  $m/z$  421.2-301.1 (declustering potential: 63V, CE: 30eV) and for CA:  $m/z$  147.0-77.0 (declustering potential:40V, CE: 30eV). Data acquisition and analysis

were performed on OS-Q software (AB Sciex, USA).

#### **Section 14 The culture conditions of Raw264.7 and MH7A cells**

Raw264.7 cells were maintained in DMEM (Hyclone, Logan, UT, USA), supplemented with 10% fetal bovine serum (FBS, Gibco, Carlsbad, CA, USA) and 100U/mL penicillin, 100µg/mL streptomycin and 2mM L-glutamine (TBD, Tianjin, China) in a humidified 5% CO<sub>2</sub> incubator at the temperature of 37°C. The Raw264.7 cells at passage numbers four to eight were used in the current experiment validations.

MH7A cells were cultured in sterile synoviocyte growth medium (Cell Applications, Inc., San Diego, CA) supplemented with 10% synoviocyte growth supplement (Cell Applications, Inc., San Diego, CA), 100U/mL penicillin, 100µg/mL streptomycin and 2mM L-glutamine (TBD, Tianjin, China) in a humidified 5% CO<sub>2</sub> incubator at the temperature of 37°C. MH7A at passage numbers four to eight were used in the current experiment validations.

#### **Section 15 NLRP3 inflammasome activation**

To induce a conventional NLRP3 inflammasome activation, Raw264.7 cells were induced with 0.2µg/mL lipopolysaccharide [LPS, Escherichia coli (O111:B4), Sigma-Aldrich, St Louis, MO, USA] for 4h, followed with a 3mM ATP adenosine triphosphate (ATP disodium salt hydrate, Sigma-Aldrich, St Louis, MO, USA) for 1h of incubation at 37°C with 5% CO<sub>2</sub> (10).

For MH7A cells LPS/ATP-induced pyroptosis, MH7A cells were induced with 1µg/mL LPS for 6h, followed with a 3mM ATP for 1h of incubation at 37°C with 5% CO<sub>2</sub> (11).

## **Section 16 Cell proliferation assay**

Cell viability was analyzed with Cell Counting Kit-8 (CCK-8) assay kit (Beyotime Biotechnology, China). Raw264.7 cells were seeded into 96-well plate, and after adherence overnight, we treated with 0.21, 0.42, 0.84, 1.69, 3.37, and 6.74ng/mL MG, as well as 0.02, 0.34, 0.07, 0.13, 0.26, and 0.54ng/mL CA, respective (as the same content of that in 0.62, 1.25, 2.49, 5.02, 10.00, and 20.00µg/mL BHGZD). Then, 10µL of CCK-8 solution was added to each well. The absorbance was measured after 4h of incubation at 37°C with 5% CO<sub>2</sub>.

## **Section 17 Flow cytometry**

To identify and quantify of pyroptosis population of Raw264.7 cells, FITC Apoptosis Detection kit I staining with both the Annexin V-fluorescein isothiocyanate and propidium iodide (PI, BD Biosciences, San Jose, CA, USA) was used in accordance with manufacturer's guidelines. Briefly, Raw264.7 cells was washed twice with cold PBS and then resuspended in 1×binding buffer at a concentration of 1x10<sup>6</sup> cells/mL. Then, 100µL of the solution (1x10<sup>5</sup> cells) was transferred to a 5 mL culture tube. Subsequently, 5µL of FITC Annexin V and 5µL PI were added into cultured tube, and vortexed and incubated for 15 min at room temperature in the dark. Finally, 400µL 1×binding buffer was added into each tube, and analyzed by flow cytometry (ACEA Bioscience, San Diego, CA, USA) and NovoExpress 1.4.1 software (ACEA Bioscience, San Diego, CA, USA) within 1h.



## **Section 18 Terminal deoxynucleotidyl transferase-mediated dUTP biotin nick end labeling (TUNEL) staining**

Cell apoptosis was determined by in situ terminal deoxynucleotidyl transferase-mediated dUTP-biotin nick end-labeling reaction (TUNEL) staining (TUNEL Andy Fluor™ 594 Apoptosis Detection Kit, ABP Biosciences, Wuhan, China) in accordance with the manufacturer's protocol.

Briefly, cells were fixed with 4% formaldehyde in PBA (pH7.4) at 4 °C for 30min. Then, they were permeabilized in PBS containing 0.2% Triton X-100 for 30min at room temperature. After incubating with 100µL TdT reaction buffer for 10 min, cells were added 20µL TdT reaction cocktail to each sample. For cell staining, incubate for 60 min at 37°C, protected from light. Subsequently, cells were added 100µL Andy Fluor™ 594-Streptavidin staining solution, and incubated for 30min at room temperature, protected from light. Finally, cells were stained with Hoechst 33342 for 5 min and the images were acquired using an inverted fluorescence microscope (MF53, MSHOT, Guangzhou, China).

## **Section 19 FAM-FLICA caspase-1 assay**

Active caspase-1 was visualized by a FAM-FLICA caspase-1 assay kit using FAM-YVAD-FMK inhibitor probe (ImmunoChemistry Technologies, Bloomington, MN, USA), according to manufacturer's guidelines. In brief, cells were added diluted FLICA to each sample at 1:30 and incubated approximately 1h. Subsequently, they were labelled with Hoechst 33342 staining and the images were analyzed with a Zeiss LSM 880 confocal microscope (Zeiss LSM 880, Carl Zeiss, Jena, Germany).

## **Section 20 Immunofluorescence staining**

Double fluorescence staining was performed as described previously (1). Rabbit anti-NLRP3 (dilution 1:100, ABclonal Technology, Wuhan, China) and mouse anti-ASC (dilution 1:50, Santa Cruz Biotechnology, Santa Cruz, CA, USA) primary antibody were used for NLRP3/ASC double immunofluorescence. Sections were then labeled with FITC- and Cy3-conjugated secondary antibodies (dilution 1:200, Servicebio, Wuhan, China) for 2h at room temperature protecting from light. Subsequently, they were labelled with 4',6-diamidino-2-phenylindole (DAPI) staining solution (Servicebio, Wuhan, China) for 4 min at room temperature, and the images were visualized and photographed with a confocal microscope (Zeiss LSM 880, Carl Zeiss, Jena, Germany) or an inverted fluorescence microscope (MF53, MSHOT, Guangzhou, China).

**Table S1 Composition of Baihu-Guizhi Decoction**

| <b>Pharmaceutical name</b>            | <b>Botanical source/family</b>        | <b>Medicinal Portions</b>                     | <b>Traditional actions/uses</b>                                                                                            | <b>Amount (g)</b> |
|---------------------------------------|---------------------------------------|-----------------------------------------------|----------------------------------------------------------------------------------------------------------------------------|-------------------|
| Gypsum                                | Gypsum Fibrosum                       | Ore<br>(CaSO <sub>4</sub> •2H <sub>2</sub> O) | Clearing away heat and fire, relieving restlessness and thirst, promoting the regeneration of the tissue and wound healing | 60                |
| <i>Anemarrhena asphodeloides</i> Bge. | <i>Anemarrhena asphodeloides</i> Bge. | Dried rhizome                                 | Clearing away heat and fire, nourishing the Yin and moisturizing dryness                                                   | 15                |
| <i>Cinnamomum cassia</i> Presl        | <i>Cinnamomum cassia</i> Presl        | Dried shoot                                   | Inducing sweating to dispel exopathogens, warming the channels to clear obstruction, and reinforcing Yang to promote qi    | 10                |
| <i>Oryza sativa</i> L.                | <i>Oryza sativa</i>                   | Dried kernel                                  | Reinforcing spleen, regulating stomach, and clearing away the lung-heat                                                    | 30                |

---

|                              |                                     |                |                                                                    |   |
|------------------------------|-------------------------------------|----------------|--------------------------------------------------------------------|---|
| <i>Glycyrrhiza uralensis</i> | <i>Glycythiza uralensis</i> Fisch., | Dried root and | Tonifying the heart and spleen, moistening the lung to arrest      | 5 |
| Fisch                        | <i>Glycythiza inflata</i> Bat.,and  | rhizome        | cough, purging fire to remove toxins, relieving spasm to alleviate |   |
|                              | <i>Glycythiza glabra</i> L.         |                | pain and harmonizing all drugs                                     |   |

---

**Table S2 The detailed information on reference standards**

| <b>Chemical name</b>  | <b>Cas No.</b> | <b>Source</b>                                                                                     | <b>Lot No.</b> | <b>Purity</b> |
|-----------------------|----------------|---------------------------------------------------------------------------------------------------|----------------|---------------|
| Timosaponin B II      | 136656-07-0    | Chengdu Must Bio-technology Co., Ltd (Chendu, China)                                              | MUST-18052605  | HPLC≥98%      |
| Mangiferin            | 4773-96-0      | The National Institute for the Control of Pharmaceutical and Biological Products (Beijing, China) | 11607-201704   | HPLC≥98.1%    |
| Glycyrrhizic acid     | 1405-86-3      | Chengdu Must Bio-technology Co., Ltd (Chendu, China)                                              | MUST-18060805  | HPLC≥98%      |
| Neomangiferin         | 64809-67-2     | Chengdu Must Bio-technology Co., Ltd (Chendu, China)                                              | MUST-18032315  | HPLC≥98%      |
| 7-O-methyl mangiferin | 31002-12-7     | Chengdu Must Bio-technology Co., Ltd (Chendu, China)                                              | MUST-17101202  | HPLC≥99.8%    |
| Anemarrhensaponin I   | 163047-21-0    | Chengdu Must Bio-technology Co., Ltd (Chendu, China)                                              | MUST-18032402  | HPLC≥98%      |
| Vitexin               | 3681-93-4      | Chengdu Must Bio-technology Co., Ltd (Chendu, China)                                              | A0358          | HPLC≥98%      |
| Formononetin          | 485-72-3       | The National Institute for the Control of Pharmaceutical and Biological Products (Beijing, China) | 111703-201504  | HPLC≥98%      |

---

|                |           |                                                                                                      |               |            |
|----------------|-----------|------------------------------------------------------------------------------------------------------|---------------|------------|
| Liquiritigenin | 578-86-9  | Chengdu DeSiTe Biological Technology Co.,Ltd (Chendu, China)                                         | DST180719-086 | HPLC≥98%   |
| Isoliquiritin  | 5041-81-6 | Chengdu DeSiTe Biological Technology Co., Ltd (Chendu, China)                                        | DST180314-015 | HPLC≥98%   |
| Cinnamic acid  | 621-82-9  | The National Institute for the Control of Pharmaceutical and Biological<br>Products (Beijing, China) | 110786-201604 | HPLC≥98.8% |

---

**Table S3 The antibodies used for western blotting analysis**

| <b>Antibody</b> | <b>Cat No.</b> | <b>Manufacturers</b>         | <b>Host</b> | <b>Description</b>                            | <b>Specificity</b>                               | <b>Molecular Weight</b> | <b>Dilution</b> |
|-----------------|----------------|------------------------------|-------------|-----------------------------------------------|--------------------------------------------------|-------------------------|-----------------|
| TLR4            | bs-20594R      | Bioss Antibodies             | Rabbit      | Rabbit Anti-TLR4 Antibody                     | Mouse, Rat, Pig,<br>Cow, Horse, Rabbit,<br>Sheep | 90/120kDa               | 1/1000          |
| NLRP3           | A5652          | ABclonal<br>ImmunoWay        | Rabbit      | NLRP3 Rabbit pAb                              | Human, Mouse, Rat                                | 110kDa                  | 1/1000          |
| p-NFκB-p65      | YP0191         | Biotechnology<br>Company     | Rabbit      | NFκB-p65 (phospho Ser536) Polyclonal Antibody | Human, Mouse, Rat,<br>Monkey                     | 60kDa                   | 1/1000          |
| NFκB-p65        | sc-8008        | Santa Cruz                   | Mouse       | NFκB p65 Antibody (F-6)                       | Mouse, Rat, Human                                | 65kDa                   | 1/1000          |
| caspase-1       | 3866           | Cell Signaling<br>Technology | Rabbit      | caspase-1 (D7F10) rabbit antibody             | Mouse, Rat, Human                                | 48/20kDa                | 1/1000          |

|              |           |                           |        |                                                                           |                        |                   |        |
|--------------|-----------|---------------------------|--------|---------------------------------------------------------------------------|------------------------|-------------------|--------|
| caspase-1    | ab179515  | Abcam                     | Rabbit | Rabbit Monoclonal (EPR16883) to pro Caspase-1+p10+p12                     | Mouse, Rat, Human      | 45/42/35/12/10kDa | 1/1000 |
| IL-1 $\beta$ | A16288    | ABclonal                  | Rabbit | IL1 beta Rabbit pAb                                                       | Human, Mouse, Rat      | 17kDa/35kDa       | 1/1000 |
| PI3K         | 4249      | Cell Signaling Technology | Rabbit | PI3 Kinase p110 $\alpha$ (C73F8) Rabbit mAb                               | Human, Mouse, Rat, Cow | 110kDa            | 1/1000 |
| p-PI3K       | bs-3332R  | Bioss Antibodies          | Rabbit | Rabbit Anti-phospho-PI3 kinase p85 alpha + gamma (Tyr467+Tyr199) Antibody | Human, Mouse, Rat      | 85/55kDa          | 1/1000 |
| AKT1         | ab89402   | Abcam                     | Mouse  | Anti-AKT1 Antibody [9A4]                                                  | Mouse, Human           | 56kDa             | 1/1000 |
| p-AKT1       | ab81283   | Abcam                     | Rabbit | Recombinant Anti-AKT1 (phospho S473) Antibody [EP2109Y]                   | Mouse, Rat, Human      | 56kDa             | 1/1000 |
| GSDMD        | ab215191  | Abcam                     | Rabbit | Recombinant Anti-DFNA5/GSDME Antibody [EPR19859]-N-terminal               | Mouse, Human           | 55kDa             | 1/1000 |
| ASC          | sc-514414 | Santa Cruz                | Mouse  | ASC Antibody (B-3)                                                        | Mouse, Rat, Human      | 24kDa             | 1/1000 |



---

|                  |        |                                 |       |                                          |                   |       |        |
|------------------|--------|---------------------------------|-------|------------------------------------------|-------------------|-------|--------|
| * $\beta$ -actin | BM0627 | Boster Biological<br>Technology | Mouse | Anti-beta-Actin/ $\beta$ -Actin Antibody | Human, Mouse, Rat | 42kDa | 1/1000 |
| #GAPDH           | ab8245 | Abcam                           | Mouse | GAPDH Mouse Monoclonal Antibody          | Mouse, Rat, Human | 37kDa | 1/1000 |

---

\* As loading control in cultured cells sample; # As loading control in arthritic tissue sample.

**Table S4 The significant differentially expressed genes (DEGs) identified by microarray analysis**

| <b>Groups</b> | <b>Symbol</b> | <b>P-value</b> | <b>Foldchange</b> | <b>Regulation</b> |
|---------------|---------------|----------------|-------------------|-------------------|
| AIA-M vs. Con | ABLIM2        | 0.0314         | 0.1894            | down              |
| AIA-M vs. Con | ACKR4         | 0.0389         | 0.3704            | down              |
| AIA-M vs. Con | ACTRT2        | 0.0273         | 0.0177            | down              |
| AIA-M vs. Con | AQP3          | 0.0419         | 0.0395            | down              |
| AIA-M vs. Con | ARC           | 0.0437         | 0.4174            | down              |
| AIA-M vs. Con | ARSI          | 0.0157         | 2.2335            | up                |
| AIA-M vs. Con | ATP2B2        | 0.0260         | 0.0152            | down              |
| AIA-M vs. Con | C3            | 0.0197         | 9.3385            | up                |
| AIA-M vs. Con | C7            | 0.0046         | 2.0019            | up                |
| AIA-M vs. Con | CACNA1S       | 0.0199         | 0.1810            | down              |
| AIA-M vs. Con | CAR13         | 0.0411         | 2.5659            | up                |
| AIA-M vs. Con | CD3G          | 0.0113         | 4.0476            | up                |
| AIA-M vs. Con | CD6           | 0.0118         | 3.0542            | up                |
| AIA-M vs. Con | CD8A          | 0.0386         | 2.4200            | up                |
| AIA-M vs. Con | CFB           | 0.0087         | 5.0173            | up                |
| AIA-M vs. Con | CHAC1         | 0.0308         | 2.3841            | up                |
| AIA-M vs. Con | CHL1          | 0.0266         | 2.4939            | up                |
| AIA-M vs. Con | CMAH          | 0.0476         | 3.9053            | up                |
| AIA-M vs. Con | COL1A1        | 0.0390         | 3.5456            | up                |
| AIA-M vs. Con | CUBN          | 0.0440         | 0.3533            | down              |
| AIA-M vs. Con | CYP26A1       | 0.0410         | 2.3796            | up                |
| AIA-M vs. Con | CYP2W1        | 0.0302         | 3.0920            | up                |
| AIA-M vs. Con | EGLN3         | 0.0224         | 0.3302            | down              |

---

|               |              |        |         |      |
|---------------|--------------|--------|---------|------|
| AIA-M vs. Con | EPHA7        | 0.0300 | 7.8100  | up   |
| AIA-M vs. Con | EXPH5        | 0.0254 | 0.4274  | down |
| AIA-M vs. Con | FKBP5        | 0.0114 | 2.8834  | up   |
| AIA-M vs. Con | FOXN1        | 0.0158 | 2.0873  | up   |
| AIA-M vs. Con | GAS2         | 0.0374 | 9.0614  | up   |
| AIA-M vs. Con | HHIP         | 0.0135 | 0.3201  | down |
| AIA-M vs. Con | ID4          | 0.0244 | 0.3266  | down |
| AIA-M vs. Con | IFIT1LB      | 0.0089 | 3.2677  | up   |
| AIA-M vs. Con | IL1B         | 0.0121 | 4.4585  | up   |
| AIA-M vs. Con | IRAK2        | 0.0264 | 0.0374  | down |
| AIA-M vs. Con | ITK          | 0.0278 | 6.5331  | up   |
| AIA-M vs. Con | KRT79        | 0.0403 | 0.3235  | down |
| AIA-M vs. Con | LOC100361018 | 0.0252 | 0.3629  | down |
| AIA-M vs. Con | LOC100364265 | 0.0423 | 2.9746  | up   |
| AIA-M vs. Con | LOC102556269 | 0.0399 | 2.2409  | up   |
| AIA-M vs. Con | LOC681325    | 0.0421 | 2.8642  | up   |
| AIA-M vs. Con | MAP2         | 0.0094 | 0.2879  | down |
| AIA-M vs. Con | MARCKS       | 0.0360 | 2.1929  | up   |
| AIA-M vs. Con | MNDA         | 0.0268 | 11.8457 | up   |
| AIA-M vs. Con | NAPSA        | 0.0398 | 2.8142  | up   |
| AIA-M vs. Con | NCKAP5       | 0.0403 | 0.4702  | down |
| AIA-M vs. Con | NKG7         | 0.0184 | 3.9782  | up   |
| AIA-M vs. Con | NRAP         | 0.0015 | 0.2919  | down |
| AIA-M vs. Con | NRBP2        | 0.0020 | 2.1317  | up   |
| AIA-M vs. Con | OLR322       | 0.0466 | 0.0440  | down |
| AIA-M vs. Con | PADI4        | 0.0321 | 4.1635  | up   |
| AIA-M vs. Con | PCDH15       | 0.0458 | 0.0293  | down |

---

---

|               |            |        |         |      |
|---------------|------------|--------|---------|------|
| AIA-M vs. Con | PHF11B     | 0.0241 | 2.9681  | up   |
| AIA-M vs. Con | PIK3CD     | 0.0214 | 2.2368  | up   |
| AIA-M vs. Con | PKHD1L1    | 0.0199 | 0.3226  | down |
| AIA-M vs. Con | PLAC9      | 0.0322 | 0.4364  | down |
| AIA-M vs. Con | PLAGL1     | 0.0099 | 2.4027  | up   |
| AIA-M vs. Con | PLXDC1     | 0.0114 | 0.4035  | down |
| AIA-M vs. Con | PLXNC1     | 0.0438 | 3.5885  | up   |
| AIA-M vs. Con | PRF1       | 0.0465 | 3.7938  | up   |
| AIA-M vs. Con | RERG       | 0.0352 | 0.3471  | down |
| AIA-M vs. Con | RET        | 0.0365 | 6.0356  | up   |
| AIA-M vs. Con | RGD1359108 | 0.0101 | 0.2924  | down |
| AIA-M vs. Con | RGD1561841 | 0.0076 | 2.3339  | up   |
| AIA-M vs. Con | RGD1563194 | 0.0490 | 2.0764  | up   |
| AIA-M vs. Con | RGD1563636 | 0.0379 | 2.0667  | up   |
| AIA-M vs. Con | RPS26      | 0.0402 | 2.6209  | up   |
| AIA-M vs. Con | S100A8     | 0.0179 | 8.7199  | up   |
| AIA-M vs. Con | S100A9     | 0.0085 | 8.1027  | up   |
| AIA-M vs. Con | SCD        | 0.0027 | 0.2437  | down |
| AIA-M vs. Con | SCG5       | 0.0397 | 0.4742  | down |
| AIA-M vs. Con | SERPINA3N  | 0.0451 | 2.3516  | up   |
| AIA-M vs. Con | SIT1       | 0.0328 | 6.1876  | up   |
| AIA-M vs. Con | SKA1       | 0.0235 | 2.3227  | up   |
| AIA-M vs. Con | SLURP1     | 0.0017 | 0.3149  | down |
| AIA-M vs. Con | STC2       | 0.0392 | 0.3961  | down |
| AIA-M vs. Con | TBC1D10C   | 0.0137 | 3.3673  | up   |
| AIA-M vs. Con | TENM3      | 0.0346 | 5.9259  | up   |
| AIA-M vs. Con | TNFRSF14   | 0.0146 | 10.3978 | up   |

---

---

|                 |          |        |         |      |
|-----------------|----------|--------|---------|------|
| AIA-M vs. Con   | TNMD     | 0.0418 | 10.2952 | up   |
| AIA-M vs. Con   | TUBB3    | 0.0089 | 2.9806  | up   |
| AIA-M vs. Con   | UBD      | 0.0133 | 10.2848 | up   |
| AIA-M vs. Con   | UNC5CL   | 0.0172 | 0.2765  | down |
| AIA-M vs. Con   | UTS2R    | 0.0234 | 12.7936 | up   |
| AIA-M vs. Con   | VSNL1    | 0.0251 | 0.4442  | down |
| AIA-M vs. Con   | WDR76    | 0.0151 | 0.1236  | down |
| AIA-M vs. Con   | WSCD1    | 0.0267 | 0.3755  | down |
| AIA-M vs. Con   | ZC3HAV1L | 0.0259 | 3.3161  | up   |
| BHGZD vs. AIA-M | AACS     | 0.0420 | 2.0649  | Up   |
| BHGZD vs. AIA-M | ABCC8    | 0.0469 | 4.1955  | Up   |
| BHGZD vs. AIA-M | ABCG1    | 0.0027 | 2.4178  | Up   |
| BHGZD vs. AIA-M | ABCG2    | 0.0033 | 4.4883  | Up   |
| BHGZD vs. AIA-M | ABCG3L4  | 0.0458 | 0.4781  | Down |
| BHGZD vs. AIA-M | ACHE     | 0.0038 | 0.4856  | Down |
| BHGZD vs. AIA-M | ACIN1    | 0.0036 | 0.4096  | Down |
| BHGZD vs. AIA-M | ACKR4    | 0.0011 | 2.1956  | Up   |
| BHGZD vs. AIA-M | ACR      | 0.0415 | 0.4025  | Down |
| BHGZD vs. AIA-M | ACSM5    | 0.0482 | 8.8784  | Up   |
| BHGZD vs. AIA-M | ACVR2B   | 0.0458 | 2.1767  | Up   |
| BHGZD vs. AIA-M | ADAP1    | 0.0228 | 2.5009  | Up   |
| BHGZD vs. AIA-M | ADCY5    | 0.0021 | 0.3591  | Down |
| BHGZD vs. AIA-M | ADCY7    | 0.0122 | 0.4698  | Down |
| BHGZD vs. AIA-M | ADORA3   | 0.0208 | 0.1566  | Down |
| BHGZD vs. AIA-M | ADRA1B   | 0.0029 | 3.1109  | Up   |
| BHGZD vs. AIA-M | AFAP1L1  | 0.0087 | 2.6193  | Up   |
| BHGZD vs. AIA-M | AFAP1L2  | 0.0076 | 3.0280  | Up   |

---

---

|                 |          |        |         |      |
|-----------------|----------|--------|---------|------|
| BHGZD vs. AIA-M | AFF2     | 0.0104 | 0.2968  | Down |
| BHGZD vs. AIA-M | AGRP     | 0.0000 | 2.0484  | Up   |
| BHGZD vs. AIA-M | AIG1     | 0.0183 | 2.0030  | Up   |
| BHGZD vs. AIA-M | AKAP1    | 0.0076 | 2.1160  | Up   |
| BHGZD vs. AIA-M | AKAP12   | 0.0369 | 2.0229  | Up   |
| BHGZD vs. AIA-M | ALG8     | 0.0345 | 2.0937  | Up   |
| BHGZD vs. AIA-M | ALG9     | 0.0389 | 2.5043  | Up   |
| BHGZD vs. AIA-M | ALOXE3   | 0.0049 | 2.1676  | Up   |
| BHGZD vs. AIA-M | ALS2     | 0.0455 | 2.4480  | Up   |
| BHGZD vs. AIA-M | AMY1A    | 0.0162 | 4.7174  | Up   |
| BHGZD vs. AIA-M | ANGPT1   | 0.0150 | 0.3922  | Down |
| BHGZD vs. AIA-M | ANKRD1   | 0.0103 | 2.3998  | Up   |
| BHGZD vs. AIA-M | ANKRD17  | 0.0025 | 0.3725  | Down |
| BHGZD vs. AIA-M | ANKRD33B | 0.0049 | 2.6067  | Up   |
| BHGZD vs. AIA-M | ANKRD55  | 0.0065 | 2.2078  | Up   |
| BHGZD vs. AIA-M | AOC2-PS1 | 0.0130 | 3.5339  | Up   |
| BHGZD vs. AIA-M | AP3D1    | 0.0002 | 0.4907  | Down |
| BHGZD vs. AIA-M | AP5Z1    | 0.0127 | 0.4092  | Down |
| BHGZD vs. AIA-M | APOOL    | 0.0495 | 2.0187  | Up   |
| BHGZD vs. AIA-M | AQP2     | 0.0052 | 0.2274  | Down |
| BHGZD vs. AIA-M | AQP3     | 0.0003 | 24.4447 | Up   |
| BHGZD vs. AIA-M | ARHGAP30 | 0.0130 | 0.3442  | Down |
| BHGZD vs. AIA-M | ARHGAP44 | 0.0106 | 0.4718  | Down |
| BHGZD vs. AIA-M | ARHGEF37 | 0.0238 | 2.5520  | Up   |
| BHGZD vs. AIA-M | ARSI     | 0.0043 | 0.2668  | Down |
| BHGZD vs. AIA-M | ARSJ     | 0.0373 | 0.4336  | Down |
| BHGZD vs. AIA-M | ART1     | 0.0075 | 0.1971  | Down |

---

---

|                 |         |        |         |      |
|-----------------|---------|--------|---------|------|
| BHGZD vs. AIA-M | ASCC3   | 0.0181 | 0.3358  | Down |
| BHGZD vs. AIA-M | ASF1B   | 0.0175 | 0.1314  | Down |
| BHGZD vs. AIA-M | ASIP    | 0.0009 | 0.0831  | Down |
| BHGZD vs. AIA-M | ASPH    | 0.0085 | 0.4026  | Down |
| BHGZD vs. AIA-M | ASS1    | 0.0242 | 2.3491  | Up   |
| BHGZD vs. AIA-M | ATAD2   | 0.0105 | 0.4846  | Down |
| BHGZD vs. AIA-M | ATMIN   | 0.0006 | 2.0549  | Up   |
| BHGZD vs. AIA-M | ATP1B2  | 0.0404 | 3.4896  | Up   |
| BHGZD vs. AIA-M | ATP5HL1 | 0.0189 | 0.4710  | Down |
| BHGZD vs. AIA-M | ATXN1   | 0.0164 | 0.4638  | Down |
| BHGZD vs. AIA-M | BATF2   | 0.0450 | 0.4370  | Down |
| BHGZD vs. AIA-M | BCAN    | 0.0334 | 0.2133  | Down |
| BHGZD vs. AIA-M | BCAS1   | 0.0049 | 2.4368  | Up   |
| BHGZD vs. AIA-M | BCL2L15 | 0.0174 | 6.7447  | Up   |
| BHGZD vs. AIA-M | BMP4    | 0.0054 | 2.5915  | Up   |
| BHGZD vs. AIA-M | BMP6    | 0.0087 | 2.6252  | Up   |
| BHGZD vs. AIA-M | BNIP1   | 0.0102 | 0.4762  | Down |
| BHGZD vs. AIA-M | BRD1    | 0.0119 | 0.3592  | Down |
| BHGZD vs. AIA-M | C2CD4B  | 0.0046 | 0.1731  | Down |
| BHGZD vs. AIA-M | C3AR1   | 0.0148 | 0.4868  | Down |
| BHGZD vs. AIA-M | C7      | 0.0142 | 0.4326  | Down |
| BHGZD vs. AIA-M | CA1     | 0.0498 | 5.3994  | Up   |
| BHGZD vs. AIA-M | CADM4   | 0.0050 | 0.3239  | Down |
| BHGZD vs. AIA-M | CALCA   | 0.0022 | 0.4193  | Down |
| BHGZD vs. AIA-M | CALCO2  | 0.0237 | 0.2221  | Down |
| BHGZD vs. AIA-M | CALU    | 0.0405 | 0.4266  | Down |
| BHGZD vs. AIA-M | CAMP    | 0.0427 | 22.2667 | Up   |

---

---

|                 |          |        |         |      |
|-----------------|----------|--------|---------|------|
| BHGZD vs. AIA-M | CAMSAP2  | 0.0003 | 0.4937  | Down |
| BHGZD vs. AIA-M | CAR13    | 0.0136 | 0.2647  | Down |
| BHGZD vs. AIA-M | CBFA2T3  | 0.0038 | 2.0248  | Up   |
| BHGZD vs. AIA-M | CBLN1    | 0.0268 | 0.2227  | Down |
| BHGZD vs. AIA-M | CCDC120  | 0.0014 | 0.4876  | Down |
| BHGZD vs. AIA-M | CCDC18   | 0.0178 | 3.8304  | Up   |
| BHGZD vs. AIA-M | CCER1    | 0.0318 | 0.4680  | Down |
| BHGZD vs. AIA-M | CCK      | 0.0009 | 0.2685  | Down |
| BHGZD vs. AIA-M | CCNO     | 0.0014 | 0.3250  | Down |
| BHGZD vs. AIA-M | CCT8L1   | 0.0398 | 2.1465  | Up   |
| BHGZD vs. AIA-M | CD177    | 0.0201 | 25.6675 | Up   |
| BHGZD vs. AIA-M | CD200R1L | 0.0251 | 3.6960  | Up   |
| BHGZD vs. AIA-M | CD3D     | 0.0341 | 0.4932  | Down |
| BHGZD vs. AIA-M | CD7      | 0.0022 | 0.4302  | Down |
| BHGZD vs. AIA-M | CD79B    | 0.0135 | 12.5255 | Up   |
| BHGZD vs. AIA-M | CDC42BPA | 0.0142 | 2.5970  | Up   |
| BHGZD vs. AIA-M | CDH19    | 0.0053 | 3.1988  | Up   |
| BHGZD vs. AIA-M | CDK14    | 0.0151 | 0.4757  | Down |
| BHGZD vs. AIA-M | CDKL4    | 0.0001 | 2.2403  | Up   |
| BHGZD vs. AIA-M | CDS1     | 0.0098 | 2.6792  | Up   |
| BHGZD vs. AIA-M | CDT1     | 0.0038 | 5.8794  | Up   |
| BHGZD vs. AIA-M | CEPT1    | 0.0207 | 2.0075  | Up   |
| BHGZD vs. AIA-M | CES2A    | 0.0017 | 0.3715  | Down |
| BHGZD vs. AIA-M | CFB      | 0.0100 | 0.2653  | Down |
| BHGZD vs. AIA-M | CFI      | 0.0370 | 0.0520  | Down |
| BHGZD vs. AIA-M | CHCHD10  | 0.0488 | 4.0023  | Up   |
| BHGZD vs. AIA-M | CHD1L    | 0.0126 | 3.2825  | Up   |

---



---

|                 |         |        |         |      |
|-----------------|---------|--------|---------|------|
| BHGZD vs. AIA-M | CHD9    | 0.0167 | 0.4806  | Down |
| BHGZD vs. AIA-M | CHIT1   | 0.0454 | 3.3368  | Up   |
| BHGZD vs. AIA-M | CHL1    | 0.0082 | 0.3051  | Down |
| BHGZD vs. AIA-M | CHODL   | 0.0181 | 3.2106  | Up   |
| BHGZD vs. AIA-M | CHRNA1  | 0.0138 | 5.4908  | Up   |
| BHGZD vs. AIA-M | CHRNB1  | 0.0033 | 5.2704  | Up   |
| BHGZD vs. AIA-M | CILP2   | 0.0238 | 0.0283  | Down |
| BHGZD vs. AIA-M | CISH    | 0.0404 | 2.3668  | Up   |
| BHGZD vs. AIA-M | CITED1  | 0.0352 | 2.5536  | Up   |
| BHGZD vs. AIA-M | CLDN1   | 0.0045 | 2.1085  | Up   |
| BHGZD vs. AIA-M | CLDN19  | 0.0380 | 2.4652  | Up   |
| BHGZD vs. AIA-M | CLDN23  | 0.0014 | 0.2124  | Down |
| BHGZD vs. AIA-M | CLDN3   | 0.0010 | 0.3343  | Down |
| BHGZD vs. AIA-M | CLEC3A  | 0.0049 | 11.2914 | Up   |
| BHGZD vs. AIA-M | CLN3    | 0.0404 | 2.4998  | Up   |
| BHGZD vs. AIA-M | CML5    | 0.0495 | 2.0109  | Up   |
| BHGZD vs. AIA-M | CMTM4   | 0.0033 | 2.5920  | Up   |
| BHGZD vs. AIA-M | COL11A1 | 0.0471 | 0.0516  | Down |
| BHGZD vs. AIA-M | COL11A2 | 0.0434 | 0.3066  | Down |
| BHGZD vs. AIA-M | COL28A1 | 0.0029 | 3.3414  | Up   |
| BHGZD vs. AIA-M | COL2A1  | 0.0410 | 13.0263 | Up   |
| BHGZD vs. AIA-M | COL9A1  | 0.0253 | 0.1424  | Down |
| BHGZD vs. AIA-M | CORO2A  | 0.0092 | 2.9709  | Up   |
| BHGZD vs. AIA-M | CPA6    | 0.0476 | 2.9989  | Up   |
| BHGZD vs. AIA-M | CPLX2   | 0.0145 | 2.4911  | Up   |
| BHGZD vs. AIA-M | CRB3    | 0.0217 | 4.4336  | Up   |
| BHGZD vs. AIA-M | CREB3L1 | 0.0014 | 0.3957  | Down |

---

---

|                 |           |        |         |      |
|-----------------|-----------|--------|---------|------|
| BHGZD vs. AIA-M | CRYGD     | 0.0036 | 0.3783  | Down |
| BHGZD vs. AIA-M | CSRNP2    | 0.0185 | 0.4489  | Down |
| BHGZD vs. AIA-M | CTDSPL    | 0.0440 | 2.2062  | Up   |
| BHGZD vs. AIA-M | CTNND2    | 0.0216 | 2.1167  | Up   |
| BHGZD vs. AIA-M | CTSG      | 0.0108 | 61.1718 | Up   |
| BHGZD vs. AIA-M | CTSLL3    | 0.0207 | 0.4663  | Down |
| BHGZD vs. AIA-M | CUBN      | 0.0272 | 4.0319  | Up   |
| BHGZD vs. AIA-M | CYP26A1   | 0.0032 | 0.3338  | Down |
| BHGZD vs. AIA-M | CYP26B1   | 0.0051 | 3.2568  | Up   |
| BHGZD vs. AIA-M | CYP2E1    | 0.0121 | 13.2940 | Up   |
| BHGZD vs. AIA-M | CYP2W1    | 0.0320 | 0.1967  | Down |
| BHGZD vs. AIA-M | DCAF5     | 0.0393 | 0.2492  | Down |
| BHGZD vs. AIA-M | DCAF6     | 0.0088 | 0.3410  | Down |
| BHGZD vs. AIA-M | DCLK3     | 0.0273 | 2.2365  | Up   |
| BHGZD vs. AIA-M | DDB2      | 0.0010 | 2.0550  | Up   |
| BHGZD vs. AIA-M | DEFA5     | 0.0314 | 31.7178 | Up   |
| BHGZD vs. AIA-M | DEFB22    | 0.0165 | 0.3771  | Down |
| BHGZD vs. AIA-M | DEGS2     | 0.0315 | 11.0218 | Up   |
| BHGZD vs. AIA-M | DERL3     | 0.0328 | 6.1441  | Up   |
| BHGZD vs. AIA-M | DET1      | 0.0043 | 2.3127  | Up   |
| BHGZD vs. AIA-M | DIO3      | 0.0315 | 0.4337  | Down |
| BHGZD vs. AIA-M | DMXL2     | 0.0046 | 2.2822  | Up   |
| BHGZD vs. AIA-M | DNAJC6    | 0.0191 | 0.4396  | Down |
| BHGZD vs. AIA-M | DNHD1-PS1 | 0.0032 | 2.0913  | Up   |
| BHGZD vs. AIA-M | DNM1L     | 0.0003 | 0.4528  | Down |
| BHGZD vs. AIA-M | DOCK2     | 0.0300 | 0.4374  | Down |
| BHGZD vs. AIA-M | DPYD      | 0.0291 | 3.0118  | Up   |

---

---

|                 |            |        |         |      |
|-----------------|------------|--------|---------|------|
| BHGZD vs. AIA-M | DUSP8      | 0.0204 | 0.1786  | Down |
| BHGZD vs. AIA-M | DYRK1B     | 0.0435 | 0.3234  | Down |
| BHGZD vs. AIA-M | E4F1       | 0.0434 | 2.1545  | Up   |
| BHGZD vs. AIA-M | ECH1       | 0.0389 | 2.5236  | Up   |
| BHGZD vs. AIA-M | EDA        | 0.0262 | 0.3909  | Down |
| BHGZD vs. AIA-M | EDN1       | 0.0228 | 2.2404  | Up   |
| BHGZD vs. AIA-M | EFCAB12    | 0.0458 | 3.8189  | Up   |
| BHGZD vs. AIA-M | EFCAB4A    | 0.0352 | 2.3815  | Up   |
| BHGZD vs. AIA-M | EFHD1      | 0.0231 | 2.6581  | Up   |
| BHGZD vs. AIA-M | EFR3B      | 0.0099 | 2.7331  | Up   |
| BHGZD vs. AIA-M | EGLN3      | 0.0216 | 2.6592  | Up   |
| BHGZD vs. AIA-M | EIF5A2     | 0.0006 | 0.4062  | Down |
| BHGZD vs. AIA-M | ELANE      | 0.0034 | 40.3800 | Up   |
| BHGZD vs. AIA-M | EMX2       | 0.0457 | 0.4756  | Down |
| BHGZD vs. AIA-M | ENO4       | 0.0371 | 2.8538  | Up   |
| BHGZD vs. AIA-M | ENPP6      | 0.0222 | 2.8345  | Up   |
| BHGZD vs. AIA-M | EPHB3      | 0.0430 | 0.3579  | Down |
| BHGZD vs. AIA-M | EPHX1      | 0.0409 | 3.0003  | Up   |
| BHGZD vs. AIA-M | ERAS       | 0.0032 | 3.4764  | Up   |
| BHGZD vs. AIA-M | ERGIC2     | 0.0282 | 0.2718  | Down |
| BHGZD vs. AIA-M | ERP27      | 0.0355 | 4.8229  | Up   |
| BHGZD vs. AIA-M | ETV3       | 0.0010 | 0.1127  | Down |
| BHGZD vs. AIA-M | EXPH5      | 0.0204 | 3.2304  | Up   |
| BHGZD vs. AIA-M | FAM114A1   | 0.0118 | 0.2573  | Down |
| BHGZD vs. AIA-M | FAM114A1L1 | 0.0246 | 0.3412  | Down |
| BHGZD vs. AIA-M | FAM195B    | 0.0052 | 0.4199  | Down |
| BHGZD vs. AIA-M | FAM212A    | 0.0131 | 2.9141  | Up   |

---

---

|                 |         |        |        |      |
|-----------------|---------|--------|--------|------|
| BHGZD vs. AIA-M | FAM214A | 0.0271 | 2.2309 | Up   |
| BHGZD vs. AIA-M | FAM221A | 0.0251 | 3.5070 | Up   |
| BHGZD vs. AIA-M | FAM63B  | 0.0330 | 2.0027 | Up   |
| BHGZD vs. AIA-M | FAM83H  | 0.0003 | 7.5046 | Up   |
| BHGZD vs. AIA-M | FBN1    | 0.0299 | 0.3944 | Down |
| BHGZD vs. AIA-M | FBP1    | 0.0051 | 0.3027 | Down |
| BHGZD vs. AIA-M | FBRSL1  | 0.0440 | 0.2479 | Down |
| BHGZD vs. AIA-M | FBXO3   | 0.0160 | 2.8668 | Up   |
| BHGZD vs. AIA-M | FBXO41  | 0.0001 | 0.4450 | Down |
| BHGZD vs. AIA-M | FES     | 0.0029 | 2.8656 | Up   |
| BHGZD vs. AIA-M | FGFR3   | 0.0034 | 0.2075 | Down |
| BHGZD vs. AIA-M | FHL5    | 0.0408 | 2.2809 | Up   |
| BHGZD vs. AIA-M | FIZ1    | 0.0042 | 3.0234 | Up   |
| BHGZD vs. AIA-M | FMO1    | 0.0243 | 4.5763 | Up   |
| BHGZD vs. AIA-M | FMO2    | 0.0198 | 3.9013 | Up   |
| BHGZD vs. AIA-M | FMOD    | 0.0200 | 0.1050 | Down |
| BHGZD vs. AIA-M | FNDC8   | 0.0230 | 0.3472 | Down |
| BHGZD vs. AIA-M | FOSB    | 0.0117 | 0.2191 | Down |
| BHGZD vs. AIA-M | FOXC2   | 0.0085 | 0.4409 | Down |
| BHGZD vs. AIA-M | FOXD4   | 0.0138 | 0.3323 | Down |
| BHGZD vs. AIA-M | FOXE1   | 0.0002 | 0.2849 | Down |
| BHGZD vs. AIA-M | FRY     | 0.0481 | 2.1531 | Up   |
| BHGZD vs. AIA-M | FRZB    | 0.0002 | 2.0461 | Up   |
| BHGZD vs. AIA-M | FST     | 0.0234 | 2.8832 | Up   |
| BHGZD vs. AIA-M | FUBP1   | 0.0002 | 0.4689 | Down |
| BHGZD vs. AIA-M | GABRQ   | 0.0109 | 0.3230 | Down |
| BHGZD vs. AIA-M | GABRR2  | 0.0352 | 2.3828 | Up   |

---

---

|                 |         |        |        |      |
|-----------------|---------|--------|--------|------|
| BHGZD vs. AIA-M | GALNT15 | 0.0252 | 2.0482 | Up   |
| BHGZD vs. AIA-M | GAS2    | 0.0478 | 0.4166 | Down |
| BHGZD vs. AIA-M | GAST    | 0.0140 | 0.4536 | Down |
| BHGZD vs. AIA-M | GATM    | 0.0021 | 2.0118 | Up   |
| BHGZD vs. AIA-M | GBF1    | 0.0131 | 0.4187 | Down |
| BHGZD vs. AIA-M | GBP1    | 0.0323 | 0.3213 | Down |
| BHGZD vs. AIA-M | GBP5    | 0.0475 | 0.4970 | Down |
| BHGZD vs. AIA-M | GDNF    | 0.0046 | 0.4219 | Down |
| BHGZD vs. AIA-M | GIPR    | 0.0184 | 2.5706 | Up   |
| BHGZD vs. AIA-M | GKN3    | 0.0330 | 7.6944 | Up   |
| BHGZD vs. AIA-M | GLS     | 0.0158 | 0.4916 | Down |
| BHGZD vs. AIA-M | GLYCTK  | 0.0457 | 2.9514 | Up   |
| BHGZD vs. AIA-M | GNL3L   | 0.0000 | 0.4296 | Down |
| BHGZD vs. AIA-M | GOLGA3  | 0.0202 | 0.4566 | Down |
| BHGZD vs. AIA-M | GOT1L1  | 0.0115 | 7.4215 | Up   |
| BHGZD vs. AIA-M | GP1BA   | 0.0169 | 0.4026 | Down |
| BHGZD vs. AIA-M | GPC3    | 0.0093 | 2.5380 | Up   |
| BHGZD vs. AIA-M | GPM6A   | 0.0172 | 6.5083 | Up   |
| BHGZD vs. AIA-M | GPR160  | 0.0445 | 2.4305 | Up   |
| BHGZD vs. AIA-M | GPR18   | 0.0337 | 2.4722 | Up   |
| BHGZD vs. AIA-M | GPR19   | 0.0418 | 3.8369 | Up   |
| BHGZD vs. AIA-M | GPR37L1 | 0.0428 | 4.0642 | Up   |
| BHGZD vs. AIA-M | GPRIN1  | 0.0116 | 0.2939 | Down |
| BHGZD vs. AIA-M | GPSM1   | 0.0017 | 0.1818 | Down |
| BHGZD vs. AIA-M | GPT2    | 0.0078 | 4.1682 | Up   |
| BHGZD vs. AIA-M | GPX8    | 0.0412 | 0.4292 | Down |
| BHGZD vs. AIA-M | GRHL1   | 0.0225 | 2.4351 | Up   |

---

---

|                 |           |        |         |      |
|-----------------|-----------|--------|---------|------|
| BHGZD vs. AIA-M | GRIA3     | 0.0149 | 0.3570  | Down |
| BHGZD vs. AIA-M | GRIN2D    | 0.0135 | 0.1066  | Down |
| BHGZD vs. AIA-M | GRM2      | 0.0059 | 0.4723  | Down |
| BHGZD vs. AIA-M | GRM3      | 0.0003 | 0.3983  | Down |
| BHGZD vs. AIA-M | GULO      | 0.0052 | 10.3961 | Up   |
| BHGZD vs. AIA-M | GYLTL1B   | 0.0024 | 0.3108  | Down |
| BHGZD vs. AIA-M | HAPLN4    | 0.0161 | 0.4897  | Down |
| BHGZD vs. AIA-M | HCN4      | 0.0109 | 0.3192  | Down |
| BHGZD vs. AIA-M | HDC       | 0.0069 | 2.1009  | Up   |
| BHGZD vs. AIA-M | HERC3     | 0.0332 | 2.7606  | Up   |
| BHGZD vs. AIA-M | HES7      | 0.0003 | 0.2000  | Down |
| BHGZD vs. AIA-M | HHIP      | 0.0307 | 2.6551  | Up   |
| BHGZD vs. AIA-M | HIST1H2BD | 0.0183 | 0.4561  | Down |
| BHGZD vs. AIA-M | HIVEP3    | 0.0276 | 0.4063  | Down |
| BHGZD vs. AIA-M | HMGCS2    | 0.0008 | 7.2208  | Up   |
| BHGZD vs. AIA-M | HNRNPH2   | 0.0018 | 0.4961  | Down |
| BHGZD vs. AIA-M | HORMAD2   | 0.0425 | 2.7430  | Up   |
| BHGZD vs. AIA-M | HOXA2     | 0.0318 | 2.3086  | Up   |
| BHGZD vs. AIA-M | HPDL      | 0.0394 | 3.0256  | Up   |
| BHGZD vs. AIA-M | HRK       | 0.0484 | 3.5924  | Up   |
| BHGZD vs. AIA-M | HS2ST1    | 0.0026 | 4.8195  | Up   |
| BHGZD vs. AIA-M | HS3ST1    | 0.0046 | 2.1463  | Up   |
| BHGZD vs. AIA-M | HSD17B13  | 0.0078 | 2.4612  | Up   |
| BHGZD vs. AIA-M | HSP90B1   | 0.0332 | 0.3565  | Down |
| BHGZD vs. AIA-M | HSPA12A   | 0.0006 | 2.1937  | Up   |
| BHGZD vs. AIA-M | HSPA4     | 0.0202 | 0.2225  | Down |
| BHGZD vs. AIA-M | HSPB7     | 0.0032 | 2.2063  | Up   |

---

---

|                 |          |        |         |      |
|-----------------|----------|--------|---------|------|
| BHGZD vs. AIA-M | HTR3B    | 0.0322 | 0.3268  | Down |
| BHGZD vs. AIA-M | ID4      | 0.0089 | 2.4937  | Up   |
| BHGZD vs. AIA-M | IFITM5   | 0.0411 | 3.0939  | Up   |
| BHGZD vs. AIA-M | IFITM6   | 0.0188 | 10.0514 | Up   |
| BHGZD vs. AIA-M | IGFBP1   | 0.0007 | 0.4857  | Down |
| BHGZD vs. AIA-M | IGFBP3   | 0.0013 | 2.0178  | Up   |
| BHGZD vs. AIA-M | IGFBP5   | 0.0167 | 0.4013  | Down |
| BHGZD vs. AIA-M | IL12A    | 0.0009 | 9.0202  | Up   |
| BHGZD vs. AIA-M | IL1R2    | 0.0158 | 2.2287  | Up   |
| BHGZD vs. AIA-M | IL2RA    | 0.0169 | 6.6070  | Up   |
| BHGZD vs. AIA-M | ILVBL    | 0.0433 | 2.0790  | Up   |
| BHGZD vs. AIA-M | IMPACT   | 0.0470 | 2.1961  | Up   |
| BHGZD vs. AIA-M | INHBB    | 0.0040 | 0.2756  | Down |
| BHGZD vs. AIA-M | INPP4A   | 0.0076 | 2.1110  | Up   |
| BHGZD vs. AIA-M | IQCF1    | 0.0021 | 0.3203  | Down |
| BHGZD vs. AIA-M | IQUB     | 0.0077 | 2.5733  | Up   |
| BHGZD vs. AIA-M | IRS1     | 0.0263 | 0.4812  | Down |
| BHGZD vs. AIA-M | ITSN1    | 0.0102 | 3.9862  | Up   |
| BHGZD vs. AIA-M | IVNS1ABP | 0.0098 | 2.1596  | Up   |
| BHGZD vs. AIA-M | JPH1     | 0.0365 | 0.3936  | Down |
| BHGZD vs. AIA-M | JPH3     | 0.0222 | 0.2022  | Down |
| BHGZD vs. AIA-M | KALRN    | 0.0251 | 2.4222  | Up   |
| BHGZD vs. AIA-M | KCNA1    | 0.0139 | 2.5517  | Up   |
| BHGZD vs. AIA-M | KCNG1    | 0.0438 | 0.3453  | Down |
| BHGZD vs. AIA-M | KCNG2    | 0.0007 | 0.3515  | Down |
| BHGZD vs. AIA-M | KCNIP3   | 0.0095 | 0.3152  | Down |
| BHGZD vs. AIA-M | KCNJ14   | 0.0140 | 3.0219  | Up   |

---

---

|                 |        |        |         |      |
|-----------------|--------|--------|---------|------|
| BHGZD vs. AIA-M | KCNMB4 | 0.0345 | 2.0004  | Up   |
| BHGZD vs. AIA-M | KDM8   | 0.0265 | 0.4231  | Down |
| BHGZD vs. AIA-M | KERA   | 0.0061 | 0.0303  | Down |
| BHGZD vs. AIA-M | KIF1B  | 0.0415 | 0.4430  | Down |
| BHGZD vs. AIA-M | KIF21A | 0.0185 | 2.0443  | Up   |
| BHGZD vs. AIA-M | KIT    | 0.0031 | 5.2042  | Up   |
| BHGZD vs. AIA-M | KLF5   | 0.0038 | 2.4390  | Up   |
| BHGZD vs. AIA-M | KLHL21 | 0.0464 | 2.7108  | Up   |
| BHGZD vs. AIA-M | KLHL26 | 0.0346 | 3.4262  | Up   |
| BHGZD vs. AIA-M | KLK5L  | 0.0166 | 0.3200  | Down |
| BHGZD vs. AIA-M | KLRA5  | 0.0415 | 0.3271  | Down |
| BHGZD vs. AIA-M | KLRC2  | 0.0112 | 0.4492  | Down |
| BHGZD vs. AIA-M | KRT13  | 0.0118 | 2.3269  | Up   |
| BHGZD vs. AIA-M | LDHC   | 0.0063 | 13.5105 | Up   |
| BHGZD vs. AIA-M | LEKR1  | 0.0272 | 0.4488  | Down |
| BHGZD vs. AIA-M | LEPR   | 0.0018 | 2.2323  | Up   |
| BHGZD vs. AIA-M | LIN28A | 0.0422 | 0.4847  | Down |
| BHGZD vs. AIA-M | LIX1   | 0.0143 | 13.2468 | Up   |
| BHGZD vs. AIA-M | LOXL2  | 0.0085 | 0.4491  | Down |
| BHGZD vs. AIA-M | LPCAT4 | 0.0374 | 2.2411  | Up   |
| BHGZD vs. AIA-M | LPPR3  | 0.0008 | 0.1284  | Down |
| BHGZD vs. AIA-M | LRRC58 | 0.0113 | 2.3397  | Up   |
| BHGZD vs. AIA-M | LRRC66 | 0.0028 | 7.2584  | Up   |
| BHGZD vs. AIA-M | LRRC71 | 0.0044 | 0.3072  | Down |
| BHGZD vs. AIA-M | LRRN2  | 0.0094 | 2.2147  | Up   |
| BHGZD vs. AIA-M | MAL    | 0.0017 | 2.0132  | Up   |
| BHGZD vs. AIA-M | MANEAL | 0.0128 | 0.2761  | Down |

---



---

|                 |          |        |         |      |
|-----------------|----------|--------|---------|------|
| BHGZD vs. AIA-M | MAP10    | 0.0349 | 2.4321  | Up   |
| BHGZD vs. AIA-M | MAP1A    | 0.0036 | 0.4473  | Down |
| BHGZD vs. AIA-M | MAP3K1   | 0.0216 | 0.4372  | Down |
| BHGZD vs. AIA-M | MAP3K13  | 0.0272 | 3.2712  | Up   |
| BHGZD vs. AIA-M | MAPK8IP3 | 0.0068 | 0.3345  | Down |
| BHGZD vs. AIA-M | MAPT     | 0.0191 | 3.6639  | Up   |
| BHGZD vs. AIA-M | MARCKS   | 0.0142 | 0.3904  | Down |
| BHGZD vs. AIA-M | MARS2    | 0.0012 | 2.5011  | Up   |
| BHGZD vs. AIA-M | MAS1     | 0.0439 | 2.2098  | Up   |
| BHGZD vs. AIA-M | MCPT8L3  | 0.0442 | 10.1938 | Up   |
| BHGZD vs. AIA-M | MCPT9    | 0.0163 | 16.5660 | Up   |
| BHGZD vs. AIA-M | MDM1     | 0.0372 | 2.6490  | Up   |
| BHGZD vs. AIA-M | MECOM    | 0.0021 | 2.0404  | Up   |
| BHGZD vs. AIA-M | MEDAG    | 0.0046 | 0.3204  | Down |
| BHGZD vs. AIA-M | MEF2A    | 0.0016 | 0.4772  | Down |
| BHGZD vs. AIA-M | MEGF10   | 0.0486 | 3.8842  | Up   |
| BHGZD vs. AIA-M | MESDC1   | 0.0188 | 3.3461  | Up   |
| BHGZD vs. AIA-M | METAP1D  | 0.0259 | 2.0867  | Up   |
| BHGZD vs. AIA-M | MISP     | 0.0031 | 2.1665  | Up   |
| BHGZD vs. AIA-M | MIXL1    | 0.0417 | 0.3528  | Down |
| BHGZD vs. AIA-M | MLPH     | 0.0410 | 2.7069  | Up   |
| BHGZD vs. AIA-M | MMP16    | 0.0054 | 0.4452  | Down |
| BHGZD vs. AIA-M | MMP28    | 0.0139 | 2.1507  | Up   |
| BHGZD vs. AIA-M | MMP8     | 0.0285 | 20.6114 | Up   |
| BHGZD vs. AIA-M | MOV10    | 0.0247 | 0.1779  | Down |
| BHGZD vs. AIA-M | MPZL1    | 0.0010 | 2.8057  | Up   |
| BHGZD vs. AIA-M | MSH5     | 0.0012 | 0.3499  | Down |

---

---

|                 |         |        |         |      |
|-----------------|---------|--------|---------|------|
| BHGZD vs. AIA-M | MSL3L2  | 0.0128 | 0.3244  | Down |
| BHGZD vs. AIA-M | MSLNL   | 0.0031 | 0.3928  | Down |
| BHGZD vs. AIA-M | MSX2    | 0.0441 | 2.3150  | Up   |
| BHGZD vs. AIA-M | MTHFR   | 0.0276 | 0.4959  | Down |
| BHGZD vs. AIA-M | MTMR14  | 0.0436 | 2.4186  | Up   |
| BHGZD vs. AIA-M | MTMR3   | 0.0150 | 3.5544  | Up   |
| BHGZD vs. AIA-M | MTMR7   | 0.0127 | 2.2391  | Up   |
| BHGZD vs. AIA-M | MTSS1L  | 0.0282 | 0.1768  | Down |
| BHGZD vs. AIA-M | MYBL2   | 0.0488 | 2.6690  | Up   |
| BHGZD vs. AIA-M | MYCBP2  | 0.0153 | 0.4521  | Down |
| BHGZD vs. AIA-M | MYH10   | 0.0356 | 0.4167  | Down |
| BHGZD vs. AIA-M | MYH15   | 0.0186 | 0.4766  | Down |
| BHGZD vs. AIA-M | NADSYN1 | 0.0011 | 0.3890  | Down |
| BHGZD vs. AIA-M | NCOA2   | 0.0026 | 0.4213  | Down |
| BHGZD vs. AIA-M | NDUFC2  | 0.0365 | 0.3246  | Down |
| BHGZD vs. AIA-M | NEDD4   | 0.0084 | 2.1043  | Up   |
| BHGZD vs. AIA-M | NEURL4  | 0.0030 | 0.4975  | Down |
| BHGZD vs. AIA-M | NEUROD6 | 0.0268 | 0.3060  | Down |
| BHGZD vs. AIA-M | NFIX    | 0.0241 | 0.4251  | Down |
| BHGZD vs. AIA-M | NIACR1  | 0.0068 | 11.4308 | Up   |
| BHGZD vs. AIA-M | NID2    | 0.0004 | 0.4863  | Down |
| BHGZD vs. AIA-M | NKD1    | 0.0079 | 0.3812  | Down |
| BHGZD vs. AIA-M | NKG7    | 0.0068 | 3.5416  | Up   |
| BHGZD vs. AIA-M | NKX2-4  | 0.0000 | 0.4715  | Down |
| BHGZD vs. AIA-M | NLGN3   | 0.0026 | 0.4480  | Down |
| BHGZD vs. AIA-M | NOG     | 0.0227 | 3.1112  | Up   |
| BHGZD vs. AIA-M | NOS1AP  | 0.0118 | 2.2813  | Up   |

---

---

|                 |         |        |         |      |
|-----------------|---------|--------|---------|------|
| BHGZD vs. AIA-M | NOTCH2  | 0.0202 | 0.4669  | Down |
| BHGZD vs. AIA-M | NP4     | 0.0210 | 13.1493 | Up   |
| BHGZD vs. AIA-M | NPAS2   | 0.0342 | 0.4876  | Down |
| BHGZD vs. AIA-M | NPB     | 0.0145 | 2.4925  | Up   |
| BHGZD vs. AIA-M | NPM1    | 0.0169 | 2.0764  | Up   |
| BHGZD vs. AIA-M | NPVF    | 0.0014 | 0.3926  | Down |
| BHGZD vs. AIA-M | NR1D1   | 0.0101 | 2.0326  | Up   |
| BHGZD vs. AIA-M | NRN1L   | 0.0439 | 2.1784  | Up   |
| BHGZD vs. AIA-M | NTF3    | 0.0411 | 2.9258  | Up   |
| BHGZD vs. AIA-M | OBP3    | 0.0238 | 2.3166  | Up   |
| BHGZD vs. AIA-M | OLR1    | 0.0356 | 0.4156  | Down |
| BHGZD vs. AIA-M | OLR1256 | 0.0319 | 0.4217  | Down |
| BHGZD vs. AIA-M | OLR1416 | 0.0002 | 0.4409  | Down |
| BHGZD vs. AIA-M | OLR1423 | 0.0013 | 0.4626  | Down |
| BHGZD vs. AIA-M | OLR1572 | 0.0486 | 0.4973  | Down |
| BHGZD vs. AIA-M | OLR1631 | 0.0138 | 0.4369  | Down |
| BHGZD vs. AIA-M | OLR1658 | 0.0040 | 0.3781  | Down |
| BHGZD vs. AIA-M | OLR183  | 0.0150 | 0.3161  | Down |
| BHGZD vs. AIA-M | OLR3    | 0.0275 | 6.4064  | Up   |
| BHGZD vs. AIA-M | OLR309  | 0.0133 | 0.4789  | Down |
| BHGZD vs. AIA-M | OLR384  | 0.0394 | 0.3866  | Down |
| BHGZD vs. AIA-M | OLR4    | 0.0059 | 0.3154  | Down |
| BHGZD vs. AIA-M | OLR588  | 0.0257 | 0.4641  | Down |
| BHGZD vs. AIA-M | OLR660  | 0.0011 | 0.3730  | Down |
| BHGZD vs. AIA-M | OLR663  | 0.0118 | 0.4785  | Down |
| BHGZD vs. AIA-M | OLR776  | 0.0083 | 0.4927  | Down |
| BHGZD vs. AIA-M | OLR791  | 0.0215 | 0.4762  | Down |

---

---

|                 |          |        |         |      |
|-----------------|----------|--------|---------|------|
| BHGZD vs. AIA-M | OPN4     | 0.0170 | 5.6110  | Up   |
| BHGZD vs. AIA-M | OPRD1    | 0.0082 | 0.2358  | Down |
| BHGZD vs. AIA-M | ORC1     | 0.0362 | 2.5349  | Up   |
| BHGZD vs. AIA-M | OXNAD1   | 0.0019 | 0.2802  | Down |
| BHGZD vs. AIA-M | P2RX1    | 0.0017 | 2.2555  | Up   |
| BHGZD vs. AIA-M | PAFAH2   | 0.0469 | 2.4106  | Up   |
| BHGZD vs. AIA-M | PAPLN    | 0.0413 | 2.3330  | Up   |
| BHGZD vs. AIA-M | PAQR5    | 0.0359 | 2.2310  | Up   |
| BHGZD vs. AIA-M | PARD3    | 0.0222 | 2.2885  | Up   |
| BHGZD vs. AIA-M | PATZ1    | 0.0270 | 2.5516  | Up   |
| BHGZD vs. AIA-M | PCSK1    | 0.0168 | 2.8247  | Up   |
| BHGZD vs. AIA-M | PDCD1LG2 | 0.0225 | 3.6308  | Up   |
| BHGZD vs. AIA-M | PDE4D    | 0.0116 | 0.4725  | Down |
| BHGZD vs. AIA-M | PDE6H    | 0.0119 | 10.5006 | Up   |
| BHGZD vs. AIA-M | PDK2     | 0.0223 | 2.2880  | Up   |
| BHGZD vs. AIA-M | PDLIM5   | 0.0244 | 0.4974  | Down |
| BHGZD vs. AIA-M | PDXP     | 0.0057 | 0.4122  | Down |
| BHGZD vs. AIA-M | PDZD3    | 0.0330 | 2.5735  | Up   |
| BHGZD vs. AIA-M | PEG10    | 0.0392 | 0.4244  | Down |
| BHGZD vs. AIA-M | PER3     | 0.0175 | 2.8615  | Up   |
| BHGZD vs. AIA-M | PFKFB2   | 0.0248 | 2.2403  | Up   |
| BHGZD vs. AIA-M | PFN2     | 0.0274 | 0.2697  | Down |
| BHGZD vs. AIA-M | PFN3     | 0.0096 | 0.1256  | Down |
| BHGZD vs. AIA-M | PGC      | 0.0150 | 0.4261  | Down |
| BHGZD vs. AIA-M | PHF3     | 0.0211 | 2.0180  | Up   |
| BHGZD vs. AIA-M | PHKA2    | 0.0024 | 5.0034  | Up   |
| BHGZD vs. AIA-M | PHLDA3   | 0.0274 | 2.1964  | Up   |

---

---

|                 |         |        |         |      |
|-----------------|---------|--------|---------|------|
| BHGZD vs. AIA-M | PHTF1   | 0.0050 | 0.4431  | Down |
| BHGZD vs. AIA-M | PIEZO2  | 0.0424 | 0.1577  | Down |
| BHGZD vs. AIA-M | PIGO    | 0.0134 | 0.2049  | Down |
| BHGZD vs. AIA-M | PIGZL1  | 0.0398 | 0.3939  | Down |
| BHGZD vs. AIA-M | PIK3CB  | 0.0386 | 2.2420  | Up   |
| BHGZD vs. AIA-M | PIK3R1  | 0.0003 | 0.3996  | Down |
| BHGZD vs. AIA-M | PIWIL2  | 0.0281 | 3.3478  | Up   |
| BHGZD vs. AIA-M | PKHD1L1 | 0.0298 | 3.2192  | Up   |
| BHGZD vs. AIA-M | PKP1    | 0.0090 | 0.2573  | Down |
| BHGZD vs. AIA-M | PLA2G2A | 0.0408 | 2.9803  | Up   |
| BHGZD vs. AIA-M | PLA2R1  | 0.0142 | 2.4487  | Up   |
| BHGZD vs. AIA-M | PLEK2   | 0.0251 | 4.1387  | Up   |
| BHGZD vs. AIA-M | PLEKHA6 | 0.0317 | 2.3145  | Up   |
| BHGZD vs. AIA-M | PLEKHH1 | 0.0435 | 2.0994  | Up   |
| BHGZD vs. AIA-M | PLEKHO2 | 0.0003 | 0.1727  | Down |
| BHGZD vs. AIA-M | PLIN4   | 0.0382 | 3.2501  | Up   |
| BHGZD vs. AIA-M | PLS1    | 0.0135 | 5.5189  | Up   |
| BHGZD vs. AIA-M | PLXNB3  | 0.0075 | 3.3997  | Up   |
| BHGZD vs. AIA-M | PNPLA7  | 0.0012 | 4.0875  | Up   |
| BHGZD vs. AIA-M | POU2AF1 | 0.0312 | 6.2493  | Up   |
| BHGZD vs. AIA-M | PPFIBP2 | 0.0161 | 0.4515  | Down |
| BHGZD vs. AIA-M | PPL     | 0.0387 | 2.1173  | Up   |
| BHGZD vs. AIA-M | PPP1R3C | 0.0130 | 3.4418  | Up   |
| BHGZD vs. AIA-M | PRG2    | 0.0339 | 21.0664 | Up   |
| BHGZD vs. AIA-M | PRIMA1  | 0.0058 | 0.4585  | Down |
| BHGZD vs. AIA-M | PRKACB  | 0.0105 | 0.4158  | Down |
| BHGZD vs. AIA-M | PRL3D4  | 0.0328 | 0.3757  | Down |

---

---

|                 |          |        |        |      |
|-----------------|----------|--------|--------|------|
| BHGZD vs. AIA-M | PROB1    | 0.0498 | 2.3304 | Up   |
| BHGZD vs. AIA-M | PROKR2   | 0.0224 | 0.4339 | Down |
| BHGZD vs. AIA-M | PRPS1    | 0.0229 | 2.4804 | Up   |
| BHGZD vs. AIA-M | PRR15    | 0.0194 | 2.5309 | Up   |
| BHGZD vs. AIA-M | PRR5L    | 0.0239 | 2.2503 | Up   |
| BHGZD vs. AIA-M | PRRX1    | 0.0456 | 0.4283 | Down |
| BHGZD vs. AIA-M | PRRX2    | 0.0452 | 0.4448 | Down |
| BHGZD vs. AIA-M | PRSS2    | 0.0027 | 0.4177 | Down |
| BHGZD vs. AIA-M | PRTN3    | 0.0362 | 5.1241 | Up   |
| BHGZD vs. AIA-M | PSIP1    | 0.0021 | 2.2954 | Up   |
| BHGZD vs. AIA-M | PSX1     | 0.0050 | 0.4872 | Down |
| BHGZD vs. AIA-M | PTCHD1   | 0.0269 | 4.5268 | Up   |
| BHGZD vs. AIA-M | PTGER2   | 0.0365 | 2.5549 | Up   |
| BHGZD vs. AIA-M | PTMA     | 0.0051 | 0.4691 | Down |
| BHGZD vs. AIA-M | PTPN1    | 0.0411 | 0.4424 | Down |
| BHGZD vs. AIA-M | PTPRC    | 0.0368 | 0.4755 | Down |
| BHGZD vs. AIA-M | PTPRD    | 0.0122 | 0.4441 | Down |
| BHGZD vs. AIA-M | PTPRG    | 0.0402 | 2.0259 | Up   |
| BHGZD vs. AIA-M | PXT1     | 0.0135 | 3.6844 | Up   |
| BHGZD vs. AIA-M | PYY      | 0.0135 | 9.3718 | Up   |
| BHGZD vs. AIA-M | RAB3A    | 0.0336 | 2.8845 | Up   |
| BHGZD vs. AIA-M | RAB40C   | 0.0157 | 2.8799 | Up   |
| BHGZD vs. AIA-M | RAB8A    | 0.0224 | 0.4884 | Down |
| BHGZD vs. AIA-M | RAD21L1  | 0.0183 | 0.1914 | Down |
| BHGZD vs. AIA-M | RAP1GAP2 | 0.0085 | 4.4876 | Up   |
| BHGZD vs. AIA-M | RASA3    | 0.0419 | 0.4978 | Down |
| BHGZD vs. AIA-M | RASGEF1C | 0.0180 | 2.8349 | Up   |

---

---

|                 |            |        |         |      |
|-----------------|------------|--------|---------|------|
| BHGZD vs. AIA-M | RASGRF1    | 0.0099 | 0.4270  | Down |
| BHGZD vs. AIA-M | RASGRP3    | 0.0006 | 2.4959  | Up   |
| BHGZD vs. AIA-M | RASL12     | 0.0160 | 2.0039  | Up   |
| BHGZD vs. AIA-M | RATNP-3B   | 0.0246 | 32.3119 | Up   |
| BHGZD vs. AIA-M | RAVER2     | 0.0053 | 0.4768  | Down |
| BHGZD vs. AIA-M | RB1        | 0.0216 | 2.2383  | Up   |
| BHGZD vs. AIA-M | RBM15B     | 0.0251 | 0.4698  | Down |
| BHGZD vs. AIA-M | RBM4B      | 0.0457 | 2.7466  | Up   |
| BHGZD vs. AIA-M | RELN       | 0.0105 | 2.0713  | Up   |
| BHGZD vs. AIA-M | RFX2       | 0.0478 | 0.4451  | Down |
| BHGZD vs. AIA-M | RGD1305202 | 0.0247 | 2.2941  | Up   |
| BHGZD vs. AIA-M | RGD1306941 | 0.0409 | 0.2374  | Down |
| BHGZD vs. AIA-M | RGD1307947 | 0.0349 | 0.4859  | Down |
| BHGZD vs. AIA-M | RGD1309049 | 0.0011 | 0.2922  | Down |
| BHGZD vs. AIA-M | RGD1309762 | 0.0002 | 2.1732  | Up   |
| BHGZD vs. AIA-M | RGD1310262 | 0.0035 | 0.4943  | Down |
| BHGZD vs. AIA-M | RGD1560958 | 0.0013 | 3.6757  | Up   |
| BHGZD vs. AIA-M | RGD1561517 | 0.0443 | 3.4994  | Up   |
| BHGZD vs. AIA-M | RGD1563354 | 0.0256 | 3.4591  | Up   |
| BHGZD vs. AIA-M | RGD1564664 | 0.0062 | 0.1560  | Down |
| BHGZD vs. AIA-M | RGD1565143 | 0.0312 | 2.1589  | Up   |
| BHGZD vs. AIA-M | RGD1566186 | 0.0247 | 0.4376  | Down |
| BHGZD vs. AIA-M | RGD1566264 | 0.0264 | 0.4979  | Down |
| BHGZD vs. AIA-M | RGS20      | 0.0267 | 2.5602  | Up   |
| BHGZD vs. AIA-M | RHAG       | 0.0061 | 42.1004 | Up   |
| BHGZD vs. AIA-M | RN45S      | 0.0010 | 0.2593  | Down |
| BHGZD vs. AIA-M | RNF112     | 0.0010 | 0.3182  | Down |

---

---

|                 |          |        |         |      |
|-----------------|----------|--------|---------|------|
| BHGZD vs. AIA-M | RNF150   | 0.0037 | 0.4448  | Down |
| BHGZD vs. AIA-M | RNF182   | 0.0005 | 0.3687  | Down |
| BHGZD vs. AIA-M | RNF24    | 0.0089 | 0.4769  | Down |
| BHGZD vs. AIA-M | RPGRIP1L | 0.0237 | 0.4714  | Down |
| BHGZD vs. AIA-M | RPS6KL1  | 0.0481 | 2.2331  | Up   |
| BHGZD vs. AIA-M | RSPO3    | 0.0059 | 2.3392  | Up   |
| BHGZD vs. AIA-M | RT1-CE5  | 0.0087 | 0.4982  | Down |
| BHGZD vs. AIA-M | RT1-T18  | 0.0196 | 0.4889  | Down |
| BHGZD vs. AIA-M | RTN4RL1  | 0.0459 | 0.3734  | Down |
| BHGZD vs. AIA-M | RTN4RL2  | 0.0000 | 0.2195  | Down |
| BHGZD vs. AIA-M | RUNX3    | 0.0416 | 0.3738  | Down |
| BHGZD vs. AIA-M | RXFP1    | 0.0184 | 2.7295  | Up   |
| BHGZD vs. AIA-M | S100A5   | 0.0223 | 4.7934  | Up   |
| BHGZD vs. AIA-M | S100A8   | 0.0291 | 15.7462 | Up   |
| BHGZD vs. AIA-M | SACS     | 0.0358 | 3.0474  | Up   |
| BHGZD vs. AIA-M | SALL3    | 0.0003 | 0.1025  | Down |
| BHGZD vs. AIA-M | SAMD9L   | 0.0170 | 0.3759  | Down |
| BHGZD vs. AIA-M | SC5D     | 0.0170 | 2.1292  | Up   |
| BHGZD vs. AIA-M | SCAF1    | 0.0004 | 0.4155  | Down |
| BHGZD vs. AIA-M | SCARA3   | 0.0124 | 0.4780  | Down |
| BHGZD vs. AIA-M | SCD      | 0.0362 | 0.1810  | Down |
| BHGZD vs. AIA-M | SCRG1    | 0.0018 | 6.9662  | Up   |
| BHGZD vs. AIA-M | SDS      | 0.0109 | 0.3728  | Down |
| BHGZD vs. AIA-M | SEC23A   | 0.0300 | 0.4989  | Down |
| BHGZD vs. AIA-M | SEC24D   | 0.0226 | 0.3923  | Down |
| BHGZD vs. AIA-M | SEMA3A   | 0.0197 | 0.3510  | Down |
| BHGZD vs. AIA-M | SEMA7A   | 0.0046 | 0.4820  | Down |

---



---

|                 |           |        |         |      |
|-----------------|-----------|--------|---------|------|
| BHGZD vs. AIA-M | SERINC2   | 0.0218 | 4.6493  | Up   |
| BHGZD vs. AIA-M | SERPINB10 | 0.0093 | 20.8117 | Up   |
| BHGZD vs. AIA-M | SERPINB7  | 0.0045 | 0.2457  | Down |
| BHGZD vs. AIA-M | SERPINF2  | 0.0158 | 3.3191  | Up   |
| BHGZD vs. AIA-M | SFRP2     | 0.0440 | 0.3608  | Down |
| BHGZD vs. AIA-M | SGCG      | 0.0245 | 0.4864  | Down |
| BHGZD vs. AIA-M | SH2D5     | 0.0329 | 4.6893  | Up   |
| BHGZD vs. AIA-M | SH3BP4    | 0.0183 | 2.0800  | Up   |
| BHGZD vs. AIA-M | SHANK1    | 0.0088 | 0.4785  | Down |
| BHGZD vs. AIA-M | SHBG      | 0.0042 | 0.1729  | Down |
| BHGZD vs. AIA-M | SHMT1     | 0.0225 | 2.1147  | Up   |
| BHGZD vs. AIA-M | SHOC2     | 0.0001 | 0.4317  | Down |
| BHGZD vs. AIA-M | SIGLEC10  | 0.0203 | 2.2390  | Up   |
| BHGZD vs. AIA-M | SIRT4     | 0.0243 | 2.2070  | Up   |
| BHGZD vs. AIA-M | SLC12A7   | 0.0013 | 0.1628  | Down |
| BHGZD vs. AIA-M | SLC14A2   | 0.0178 | 0.3743  | Down |
| BHGZD vs. AIA-M | SLC16A10  | 0.0148 | 3.3071  | Up   |
| BHGZD vs. AIA-M | SLC16A12  | 0.0408 | 2.1570  | Up   |
| BHGZD vs. AIA-M | SLC16A14  | 0.0009 | 0.3495  | Down |
| BHGZD vs. AIA-M | SLC19A2   | 0.0054 | 2.5607  | Up   |
| BHGZD vs. AIA-M | SLC22A5   | 0.0025 | 2.9357  | Up   |
| BHGZD vs. AIA-M | SLC26A10  | 0.0208 | 3.9026  | Up   |
| BHGZD vs. AIA-M | SLC26A2   | 0.0171 | 0.4651  | Down |
| BHGZD vs. AIA-M | SLC27A1   | 0.0120 | 2.6400  | Up   |
| BHGZD vs. AIA-M | SLC30A3   | 0.0015 | 0.4097  | Down |
| BHGZD vs. AIA-M | SLC31A1   | 0.0279 | 0.3400  | Down |
| BHGZD vs. AIA-M | SLC35A2   | 0.0001 | 0.4099  | Down |

---

---

|                 |            |        |        |      |
|-----------------|------------|--------|--------|------|
| BHGZD vs. AIA-M | SLC39A13   | 0.0391 | 0.4962 | Down |
| BHGZD vs. AIA-M | SLC45A4    | 0.0114 | 0.2303 | Down |
| BHGZD vs. AIA-M | SLC46A3    | 0.0270 | 2.6161 | Up   |
| BHGZD vs. AIA-M | SLC4A10    | 0.0190 | 4.3808 | Up   |
| BHGZD vs. AIA-M | SLC5A4     | 0.0057 | 0.2314 | Down |
| BHGZD vs. AIA-M | SLC6A6     | 0.0007 | 2.8127 | Up   |
| BHGZD vs. AIA-M | SLC7A6OS   | 0.0137 | 2.7576 | Up   |
| BHGZD vs. AIA-M | SLC9A6     | 0.0261 | 2.1014 | Up   |
| BHGZD vs. AIA-M | SLIT1      | 0.0086 | 0.4706 | Down |
| BHGZD vs. AIA-M | SLIT2      | 0.0238 | 0.4182 | Down |
| BHGZD vs. AIA-M | SNED1      | 0.0000 | 0.2447 | Down |
| BHGZD vs. AIA-M | SNX18      | 0.0286 | 0.4541 | Down |
| BHGZD vs. AIA-M | SOX18      | 0.0344 | 2.0132 | Up   |
| BHGZD vs. AIA-M | SOX4       | 0.0299 | 0.4587 | Down |
| BHGZD vs. AIA-M | SPATA2     | 0.0200 | 0.3291 | Down |
| BHGZD vs. AIA-M | SPATA31D3  | 0.0406 | 0.4402 | Down |
| BHGZD vs. AIA-M | SPATA6L    | 0.0322 | 2.6870 | Up   |
| BHGZD vs. AIA-M | SPRY1      | 0.0099 | 2.2946 | Up   |
| BHGZD vs. AIA-M | SPSB4      | 0.0190 | 0.2411 | Down |
| BHGZD vs. AIA-M | SPTA1      | 0.0363 | 9.5993 | Up   |
| BHGZD vs. AIA-M | SRCIN1     | 0.0037 | 0.2349 | Down |
| BHGZD vs. AIA-M | SRGN       | 0.0382 | 2.6861 | Up   |
| BHGZD vs. AIA-M | SRRM3      | 0.0012 | 2.2917 | Up   |
| BHGZD vs. AIA-M | ST6GALNAC3 | 0.0436 | 2.0062 | Up   |
| BHGZD vs. AIA-M | STAB2      | 0.0374 | 3.8511 | Up   |
| BHGZD vs. AIA-M | STAR       | 0.0213 | 2.6284 | Up   |
| BHGZD vs. AIA-M | STAU2      | 0.0019 | 3.5801 | Up   |

---

---

|                 |          |        |        |      |
|-----------------|----------|--------|--------|------|
| BHGZD vs. AIA-M | SULF1    | 0.0124 | 2.1566 | Up   |
| BHGZD vs. AIA-M | SURF6    | 0.0154 | 0.3473 | Down |
| BHGZD vs. AIA-M | SUSD5    | 0.0129 | 0.3962 | Down |
| BHGZD vs. AIA-M | SUV39H1  | 0.0096 | 3.8594 | Up   |
| BHGZD vs. AIA-M | SVS3B    | 0.0368 | 0.4953 | Down |
| BHGZD vs. AIA-M | SYNE1    | 0.0198 | 2.2951 | Up   |
| BHGZD vs. AIA-M | SYVN1    | 0.0350 | 2.0462 | Up   |
| BHGZD vs. AIA-M | TAC3     | 0.0045 | 0.4511 | Down |
| BHGZD vs. AIA-M | TAOK3    | 0.0391 | 0.4979 | Down |
| BHGZD vs. AIA-M | TBC1D1   | 0.0292 | 0.4385 | Down |
| BHGZD vs. AIA-M | TBC1D15  | 0.0111 | 2.2861 | Up   |
| BHGZD vs. AIA-M | TBC1D22B | 0.0088 | 2.1601 | Up   |
| BHGZD vs. AIA-M | TBC1D23  | 0.0001 | 0.4320 | Down |
| BHGZD vs. AIA-M | TBX4     | 0.0237 | 2.2216 | Up   |
| BHGZD vs. AIA-M | TCF7     | 0.0008 | 0.4774 | Down |
| BHGZD vs. AIA-M | TEKT3    | 0.0108 | 0.3935 | Down |
| BHGZD vs. AIA-M | TERC     | 0.0167 | 3.0392 | Up   |
| BHGZD vs. AIA-M | TEX22    | 0.0002 | 0.1478 | Down |
| BHGZD vs. AIA-M | TFPI     | 0.0129 | 2.2050 | Up   |
| BHGZD vs. AIA-M | TFRC     | 0.0338 | 3.0530 | Up   |
| BHGZD vs. AIA-M | TGFA     | 0.0328 | 3.0885 | Up   |
| BHGZD vs. AIA-M | TGFBR2   | 0.0381 | 0.4674 | Down |
| BHGZD vs. AIA-M | THBS1    | 0.0022 | 0.1141 | Down |
| BHGZD vs. AIA-M | THEG     | 0.0411 | 0.4334 | Down |
| BHGZD vs. AIA-M | TIAM1    | 0.0046 | 2.2586 | Up   |
| BHGZD vs. AIA-M | TLX3     | 0.0027 | 0.2204 | Down |
| BHGZD vs. AIA-M | TMEM101  | 0.0423 | 2.1184 | Up   |

---

---

|                 |          |        |        |      |
|-----------------|----------|--------|--------|------|
| BHGZD vs. AIA-M | TMEM116  | 0.0199 | 3.1051 | Up   |
| BHGZD vs. AIA-M | TMEM120A | 0.0302 | 2.6476 | Up   |
| BHGZD vs. AIA-M | TMEM136  | 0.0034 | 2.1245 | Up   |
| BHGZD vs. AIA-M | TMEM170B | 0.0004 | 0.4647 | Down |
| BHGZD vs. AIA-M | TMEM229A | 0.0147 | 0.2337 | Down |
| BHGZD vs. AIA-M | TMEM65   | 0.0345 | 0.4447 | Down |
| BHGZD vs. AIA-M | TNFAIP2  | 0.0118 | 0.4574 | Down |
| BHGZD vs. AIA-M | TNMD     | 0.0245 | 0.0273 | Down |
| BHGZD vs. AIA-M | TPD52L1  | 0.0082 | 3.4924 | Up   |
| BHGZD vs. AIA-M | TRAF3IP2 | 0.0241 | 2.0413 | Up   |
| BHGZD vs. AIA-M | TRIM26   | 0.0091 | 0.4391 | Down |
| BHGZD vs. AIA-M | TRPS1    | 0.0295 | 0.4616 | Down |
| BHGZD vs. AIA-M | TRPV4    | 0.0330 | 0.1894 | Down |
| BHGZD vs. AIA-M | TTC28    | 0.0001 | 0.4974 | Down |
| BHGZD vs. AIA-M | TTL      | 0.0131 | 0.4912 | Down |
| BHGZD vs. AIA-M | TUBB3    | 0.0031 | 0.2207 | Down |
| BHGZD vs. AIA-M | TWF1     | 0.0391 | 0.4871 | Down |
| BHGZD vs. AIA-M | TWIST2   | 0.0148 | 0.1320 | Down |
| BHGZD vs. AIA-M | TYRP1    | 0.0240 | 0.0728 | Down |
| BHGZD vs. AIA-M | UCK1     | 0.0490 | 2.1211 | Up   |
| BHGZD vs. AIA-M | UCMA     | 0.0215 | 0.4842 | Down |
| BHGZD vs. AIA-M | UGT2B37  | 0.0086 | 0.4247 | Down |
| BHGZD vs. AIA-M | UNC5CL   | 0.0164 | 2.6192 | Up   |
| BHGZD vs. AIA-M | UPK1B    | 0.0059 | 2.3892 | Up   |
| BHGZD vs. AIA-M | UPRT     | 0.0394 | 0.3654 | Down |
| BHGZD vs. AIA-M | USB1     | 0.0096 | 2.4116 | Up   |
| BHGZD vs. AIA-M | USP25    | 0.0091 | 0.4834 | Down |

---

---

|                 |          |        |         |      |
|-----------------|----------|--------|---------|------|
| BHGZD vs. AIA-M | UTP18    | 0.0202 | 0.3060  | Down |
| BHGZD vs. AIA-M | UTP20    | 0.0053 | 0.3535  | Down |
| BHGZD vs. AIA-M | UTS2R    | 0.0391 | 0.0988  | Down |
| BHGZD vs. AIA-M | VAMP2    | 0.0169 | 2.1739  | Up   |
| BHGZD vs. AIA-M | VANGL2   | 0.0201 | 0.3083  | Down |
| BHGZD vs. AIA-M | VARS     | 0.0318 | 2.7269  | Up   |
| BHGZD vs. AIA-M | VKORC1L1 | 0.0261 | 2.1558  | Up   |
| BHGZD vs. AIA-M | VOM2R44  | 0.0292 | 3.5320  | Up   |
| BHGZD vs. AIA-M | VPREB3   | 0.0033 | 16.4933 | Up   |
| BHGZD vs. AIA-M | VPS37B   | 0.0113 | 2.2007  | Up   |
| BHGZD vs. AIA-M | VSNL1    | 0.0161 | 2.0197  | Up   |
| BHGZD vs. AIA-M | VWA8     | 0.0001 | 2.2325  | Up   |
| BHGZD vs. AIA-M | WDFY3    | 0.0050 | 0.2116  | Down |
| BHGZD vs. AIA-M | WDR93    | 0.0341 | 2.2703  | Up   |
| BHGZD vs. AIA-M | WIF1     | 0.0373 | 4.4304  | Up   |
| BHGZD vs. AIA-M | WNT11    | 0.0049 | 4.6054  | Up   |
| BHGZD vs. AIA-M | WWTR1    | 0.0382 | 0.4475  | Down |
| BHGZD vs. AIA-M | YKT6     | 0.0072 | 0.4340  | Down |
| BHGZD vs. AIA-M | YTHDF2   | 0.0006 | 0.1848  | Down |
| BHGZD vs. AIA-M | ZAK      | 0.0025 | 0.4285  | Down |
| BHGZD vs. AIA-M | ZBTB20   | 0.0278 | 0.2387  | Down |
| BHGZD vs. AIA-M | ZBTB24   | 0.0120 | 6.3954  | Up   |
| BHGZD vs. AIA-M | ZCCHC10  | 0.0022 | 0.4698  | Down |
| BHGZD vs. AIA-M | ZCCHC14  | 0.0236 | 0.4881  | Down |
| BHGZD vs. AIA-M | ZDHHC18  | 0.0167 | 0.1401  | Down |
| BHGZD vs. AIA-M | ZDHHC23  | 0.0059 | 2.7416  | Up   |
| BHGZD vs. AIA-M | ZFAND4   | 0.0104 | 2.5769  | Up   |

---

---

|                 |         |        |        |      |
|-----------------|---------|--------|--------|------|
| BHGZD vs. AIA-M | ZFP185  | 0.0091 | 0.2521 | Down |
| BHGZD vs. AIA-M | ZFP213  | 0.0376 | 3.9199 | Up   |
| BHGZD vs. AIA-M | ZFP39   | 0.0480 | 2.0992 | Up   |
| BHGZD vs. AIA-M | ZFP458  | 0.0092 | 0.4990 | Down |
| BHGZD vs. AIA-M | ZFP575  | 0.0047 | 0.3078 | Down |
| BHGZD vs. AIA-M | ZFP667  | 0.0409 | 2.2474 | Up   |
| BHGZD vs. AIA-M | ZFP93   | 0.0062 | 0.4933 | Down |
| BHGZD vs. AIA-M | ZFP956  | 0.0131 | 5.0045 | Up   |
| BHGZD vs. AIA-M | ZFPM2   | 0.0343 | 0.2962 | Down |
| BHGZD vs. AIA-M | ZFYVE27 | 0.0295 | 2.3899 | Up   |
| BHGZD vs. AIA-M | ZNRF4   | 0.0016 | 0.1113 | Down |
| BHGZD vs. AIA-M | ZXDC    | 0.0168 | 0.2641 | Down |

---

**Table S5 The significant differentially expressed genes (DEGs) identified by mRNA Sequencing (mRNA-Seq)**

| <b>Groups</b>          | <b>Symbol</b> | <b>P-value</b> | <b>log2FoldChange</b> | <b>Regulation</b> |
|------------------------|---------------|----------------|-----------------------|-------------------|
| AIA-M vs. Con_mRNA_Seq | AA926063      | 0.0103         | 4.6924                | Up                |
| AIA-M vs. Con_mRNA_Seq | ABCA4         | 0.0333         | -1.0431               | Down              |
| AIA-M vs. Con_mRNA_Seq | ACSBG1        | 0.0137         | 2.3568                | Up                |
| AIA-M vs. Con_mRNA_Seq | ADAD1         | 0.0436         | -5.1493               | Down              |
| AIA-M vs. Con_mRNA_Seq | ADAM3A        | 0.0437         | -5.1437               | Down              |
| AIA-M vs. Con_mRNA_Seq | ADAP2         | 0.0010         | 3.0242                | Up                |
| AIA-M vs. Con_mRNA_Seq | ADCY5         | 0.0011         | 1.5517                | Up                |
| AIA-M vs. Con_mRNA_Seq | AGRP          | 0.0234         | 1.4030                | Up                |
| AIA-M vs. Con_mRNA_Seq | AHRR          | 0.0004         | -4.3563               | Down              |
| AIA-M vs. Con_mRNA_Seq | AKAP12        | 0.0020         | -1.5834               | Down              |
| AIA-M vs. Con_mRNA_Seq | ALDOC         | 0.0010         | 2.4691                | Up                |
| AIA-M vs. Con_mRNA_Seq | ANGPTL2       | 0.0417         | 3.7609                | Up                |
| AIA-M vs. Con_mRNA_Seq | ANTXR2        | 0.0337         | 1.0409                | Up                |
| AIA-M vs. Con_mRNA_Seq | AOC3          | 0.0145         | -5.7090               | Down              |
| AIA-M vs. Con_mRNA_Seq | APC2          | 0.0097         | 4.6623                | Up                |
| AIA-M vs. Con_mRNA_Seq | APOBEC1       | 0.0122         | 1.5453                | Up                |
| AIA-M vs. Con_mRNA_Seq | ARHGAP18      | 0.0033         | 1.0271                | Up                |
| AIA-M vs. Con_mRNA_Seq | ARHGEF4       | 0.0259         | 1.8822                | Up                |
| AIA-M vs. Con_mRNA_Seq | ART4          | 0.0004         | -1.3477               | Down              |
| AIA-M vs. Con_mRNA_Seq | ASS1          | 0.0048         | 1.0208                | Up                |
| AIA-M vs. Con_mRNA_Seq | ASTN1         | 0.0034         | 1.1875                | Up                |
| AIA-M vs. Con_mRNA_Seq | ATF3          | 0.0002         | 1.8320                | Up                |
| AIA-M vs. Con_mRNA_Seq | ATF5          | 0.0006         | 1.7382                | Up                |

---

|                        |         |        |         |      |
|------------------------|---------|--------|---------|------|
| AIA-M vs. Con_mRNA_Seq | AVPI1   | 0.0312 | 1.0902  | Up   |
| AIA-M vs. Con_mRNA_Seq | BATF    | 0.0023 | 1.0684  | Up   |
| AIA-M vs. Con_mRNA_Seq | BCL2L15 | 0.0424 | -1.7395 | Down |
| AIA-M vs. Con_mRNA_Seq | BCL7A   | 0.0081 | 4.3723  | Up   |
| AIA-M vs. Con_mRNA_Seq | BFSP2   | 0.0039 | 1.3618  | Up   |
| AIA-M vs. Con_mRNA_Seq | BGLAP   | 0.0072 | 1.1948  | Up   |
| AIA-M vs. Con_mRNA_Seq | BRICD5  | 0.0180 | 4.9630  | Up   |
| AIA-M vs. Con_mRNA_Seq | BRMS1L  | 0.0383 | -1.0459 | Down |
| AIA-M vs. Con_mRNA_Seq | BTBD8   | 0.0350 | -1.5747 | Down |
| AIA-M vs. Con_mRNA_Seq | BTD     | 0.0066 | 1.2074  | Up   |
| AIA-M vs. Con_mRNA_Seq | BTLA    | 0.0352 | -1.0068 | Down |
| AIA-M vs. Con_mRNA_Seq | BTNL10  | 0.0128 | -1.7170 | Down |
| AIA-M vs. Con_mRNA_Seq | CAMK1   | 0.0379 | 3.2749  | Up   |
| AIA-M vs. Con_mRNA_Seq | CASP12  | 0.0011 | -3.1532 | Down |
| AIA-M vs. Con_mRNA_Seq | CASTOR2 | 0.0201 | -2.4924 | Down |
| AIA-M vs. Con_mRNA_Seq | CBLN2   | 0.0021 | 1.1423  | Up   |
| AIA-M vs. Con_mRNA_Seq | CCDC92  | 0.0000 | 1.7220  | Up   |
| AIA-M vs. Con_mRNA_Seq | CCHCR1  | 0.0030 | -1.3041 | Down |
| AIA-M vs. Con_mRNA_Seq | CCL3    | 0.0003 | 1.9617  | Up   |
| AIA-M vs. Con_mRNA_Seq | CCL4    | 0.0475 | 1.1632  | Up   |
| AIA-M vs. Con_mRNA_Seq | CCL6    | 0.0000 | 1.7045  | Up   |
| AIA-M vs. Con_mRNA_Seq | CD101   | 0.0000 | 1.1296  | Up   |
| AIA-M vs. Con_mRNA_Seq | CD177   | 0.0031 | -1.9882 | Down |
| AIA-M vs. Con_mRNA_Seq | CD300LB | 0.0021 | 1.2526  | Up   |
| AIA-M vs. Con_mRNA_Seq | CD79AL  | 0.0081 | -1.1535 | Down |
| AIA-M vs. Con_mRNA_Seq | CDC20   | 0.0236 | -1.1730 | Down |
| AIA-M vs. Con_mRNA_Seq | CDC6    | 0.0311 | -1.4314 | Down |

---



|                        |                   |        |         |      |
|------------------------|-------------------|--------|---------|------|
| AIA-M vs. Con_mRNA_Seq | CDCA2             | 0.0117 | -3.2077 | Down |
| AIA-M vs. Con_mRNA_Seq | CDK1              | 0.0221 | -1.7974 | Down |
| AIA-M vs. Con_mRNA_Seq | CEBPD             | 0.0041 | 1.0660  | Up   |
| AIA-M vs. Con_mRNA_Seq | CELA1             | 0.0012 | 1.5977  | Up   |
| AIA-M vs. Con_mRNA_Seq | CENPT             | 0.0286 | -1.4661 | Down |
| AIA-M vs. Con_mRNA_Seq | CENPU             | 0.0019 | -1.4502 | Down |
| AIA-M vs. Con_mRNA_Seq | CEP70             | 0.0064 | -1.3041 | Down |
| AIA-M vs. Con_mRNA_Seq | CEP83             | 0.0108 | -1.1933 | Down |
| AIA-M vs. Con_mRNA_Seq | CFAP126           | 0.0037 | 2.6429  | Up   |
| AIA-M vs. Con_mRNA_Seq | CFAP70            | 0.0109 | 1.3155  | Up   |
| AIA-M vs. Con_mRNA_Seq | CFAP97            | 0.0000 | -1.5669 | Down |
| AIA-M vs. Con_mRNA_Seq | CHRD              | 0.0100 | 2.3895  | Up   |
| AIA-M vs. Con_mRNA_Seq | CLEC11A           | 0.0133 | 4.4798  | Up   |
| AIA-M vs. Con_mRNA_Seq | CLEC4B2           | 0.0016 | 1.6781  | Up   |
| AIA-M vs. Con_mRNA_Seq | CLEC5A            | 0.0014 | 1.1640  | Up   |
| AIA-M vs. Con_mRNA_Seq | CLU               | 0.0039 | 1.0155  | Up   |
| AIA-M vs. Con_mRNA_Seq | COL20A1           | 0.0469 | 1.0120  | Up   |
| AIA-M vs. Con_mRNA_Seq | COL4A3            | 0.0000 | -2.4803 | Down |
| AIA-M vs. Con_mRNA_Seq | CRABP1            | 0.0243 | 1.9562  | Up   |
|                        | CRABP2//LOC100911 |        |         |      |
| AIA-M vs. Con_mRNA_Seq | 902               | 0.0057 | -4.8634 | Down |
| AIA-M vs. Con_mRNA_Seq | CRISPLD2          | 0.0062 | 1.3742  | Up   |
| AIA-M vs. Con_mRNA_Seq | CSF1              | 0.0065 | 1.2866  | Up   |
| AIA-M vs. Con_mRNA_Seq | CTDSPL            | 0.0348 | 1.0889  | Up   |
| AIA-M vs. Con_mRNA_Seq | CTTN              | 0.0137 | 1.0143  | Up   |
| AIA-M vs. Con_mRNA_Seq | CXCL17            | 0.0164 | 3.2503  | Up   |
| AIA-M vs. Con_mRNA_Seq | CXCL2             | 0.0012 | 1.9025  | Up   |

---

|                        |         |        |         |      |
|------------------------|---------|--------|---------|------|
| AIA-M vs. Con_mRNA_Seq | CXXC4   | 0.0126 | 1.1896  | Up   |
| AIA-M vs. Con_mRNA_Seq | CYB5D1  | 0.0367 | -1.0541 | Down |
| AIA-M vs. Con_mRNA_Seq | CYP26C1 | 0.0388 | 4.4533  | Up   |
| AIA-M vs. Con_mRNA_Seq | CYP2U1  | 0.0365 | -1.0153 | Down |
| AIA-M vs. Con_mRNA_Seq | DACT1   | 0.0091 | 3.5048  | Up   |
| AIA-M vs. Con_mRNA_Seq | DCLK1   | 0.0123 | -5.0458 | Down |
| AIA-M vs. Con_mRNA_Seq | DDX25   | 0.0396 | -3.1180 | Down |
| AIA-M vs. Con_mRNA_Seq | DEFB24  | 0.0345 | 2.8901  | Up   |
| AIA-M vs. Con_mRNA_Seq | DENND2C | 0.0242 | 1.1059  | Up   |
| AIA-M vs. Con_mRNA_Seq | DHFR    | 0.0419 | -1.1018 | Down |
| AIA-M vs. Con_mRNA_Seq | DNAH1   | 0.0186 | 1.1723  | Up   |
| AIA-M vs. Con_mRNA_Seq | DNAJC4  | 0.0372 | 1.0106  | Up   |
| AIA-M vs. Con_mRNA_Seq | DOK4    | 0.0109 | 1.2929  | Up   |
| AIA-M vs. Con_mRNA_Seq | DUSP1   | 0.0000 | 1.4543  | Up   |
| AIA-M vs. Con_mRNA_Seq | DUSP6   | 0.0000 | 1.1605  | Up   |
| AIA-M vs. Con_mRNA_Seq | DUSP7   | 0.0073 | 1.1521  | Up   |
| AIA-M vs. Con_mRNA_Seq | EBF1    | 0.0117 | -1.2113 | Down |
| AIA-M vs. Con_mRNA_Seq | ECE2    | 0.0297 | 3.5704  | Up   |
| AIA-M vs. Con_mRNA_Seq | ECT2    | 0.0095 | 4.5099  | Up   |
| AIA-M vs. Con_mRNA_Seq | EDN1    | 0.0333 | -2.8289 | Down |
| AIA-M vs. Con_mRNA_Seq | EGR3    | 0.0400 | -2.6568 | Down |
| AIA-M vs. Con_mRNA_Seq | EHD2    | 0.0323 | 1.0293  | Up   |
| AIA-M vs. Con_mRNA_Seq | ELN     | 0.0335 | 4.4083  | Up   |
| AIA-M vs. Con_mRNA_Seq | EMILIN1 | 0.0492 | 1.4588  | Up   |
| AIA-M vs. Con_mRNA_Seq | ENTPD1  | 0.0003 | 1.1267  | Up   |
| AIA-M vs. Con_mRNA_Seq | EPB41L3 | 0.0001 | -3.7357 | Down |
| AIA-M vs. Con_mRNA_Seq | EPHA1   | 0.0033 | 1.3204  | Up   |

---

---

|                        |                   |        |         |      |
|------------------------|-------------------|--------|---------|------|
| AIA-M vs. Con_mRNA_Seq | ERBB3             | 0.0343 | 1.9450  | Up   |
| AIA-M vs. Con_mRNA_Seq | ERFE              | 0.0315 | 3.3489  | Up   |
| AIA-M vs. Con_mRNA_Seq | ESPL1             | 0.0443 | -2.2720 | Down |
| AIA-M vs. Con_mRNA_Seq | F11R              | 0.0037 | 1.1213  | Up   |
| AIA-M vs. Con_mRNA_Seq | F2RL3             | 0.0056 | 1.1166  | Up   |
| AIA-M vs. Con_mRNA_Seq | FAAP20            | 0.0038 | 1.0066  | Up   |
| AIA-M vs. Con_mRNA_Seq | FAM166A           | 0.0304 | -1.1430 | Down |
| AIA-M vs. Con_mRNA_Seq | FAM183A           | 0.0211 | 2.2844  | Up   |
| AIA-M vs. Con_mRNA_Seq | FAM184A           | 0.0416 | 1.6124  | Up   |
| AIA-M vs. Con_mRNA_Seq | FAM25A            | 0.0161 | -2.7549 | Down |
| AIA-M vs. Con_mRNA_Seq | FAM72A            | 0.0012 | -5.2848 | Down |
| AIA-M vs. Con_mRNA_Seq | FARS2             | 0.0219 | -1.0924 | Down |
| AIA-M vs. Con_mRNA_Seq | FBXO24            | 0.0077 | 4.4980  | Up   |
|                        | FCGR2A//LOC10834  |        |         |      |
| AIA-M vs. Con_mRNA_Seq | 8047              | 0.0003 | 1.0137  | Up   |
| AIA-M vs. Con_mRNA_Seq | FCGRT             | 0.0315 | -1.0021 | Down |
| AIA-M vs. Con_mRNA_Seq | FNDC9             | 0.0044 | -1.8445 | Down |
| AIA-M vs. Con_mRNA_Seq | FOLR2             | 0.0297 | 3.4803  | Up   |
| AIA-M vs. Con_mRNA_Seq | FOS               | 0.0000 | 2.1489  | Up   |
| AIA-M vs. Con_mRNA_Seq | FRG2              | 0.0125 | -5.1115 | Down |
| AIA-M vs. Con_mRNA_Seq | FRMD4B            | 0.0323 | -1.2156 | Down |
| AIA-M vs. Con_mRNA_Seq | GAB1              | 0.0436 | -3.1717 | Down |
| AIA-M vs. Con_mRNA_Seq | GADD45G           | 0.0463 | 1.1221  | Up   |
| AIA-M vs. Con_mRNA_Seq | GAS2L1            | 0.0021 | 1.1011  | Up   |
|                        | GATA1//LOC1083480 |        |         |      |
| AIA-M vs. Con_mRNA_Seq | 91                | 0.0076 | -1.2542 | Down |
| AIA-M vs. Con_mRNA_Seq | GDPD5             | 0.0028 | 1.5424  | Up   |

---

|                        |                   |        |         |      |
|------------------------|-------------------|--------|---------|------|
| AIA-M vs. Con_mRNA_Seq | GFOD2             | 0.0465 | 1.9332  | Up   |
| AIA-M vs. Con_mRNA_Seq | GFY               | 0.0007 | -5.6188 | Down |
| AIA-M vs. Con_mRNA_Seq | GIN1              | 0.0308 | 1.3586  | Up   |
| AIA-M vs. Con_mRNA_Seq | GNAZ              | 0.0086 | 1.0121  | Up   |
| AIA-M vs. Con_mRNA_Seq | GP1BB             | 0.0008 | 1.9090  | Up   |
| AIA-M vs. Con_mRNA_Seq | GP9               | 0.0038 | 1.0026  | Up   |
| AIA-M vs. Con_mRNA_Seq | GPNMB             | 0.0033 | 1.1974  | Up   |
| AIA-M vs. Con_mRNA_Seq | GRB10             | 0.0005 | 2.6721  | Up   |
|                        | GSTA1//LOC1083480 |        |         |      |
| AIA-M vs. Con_mRNA_Seq | 61                | 0.0053 | 1.0067  | Up   |
| AIA-M vs. Con_mRNA_Seq | GSTM5//GSTM3      | 0.0056 | -1.6182 | Down |
| AIA-M vs. Con_mRNA_Seq | HAVCR2            | 0.0464 | -1.2644 | Down |
| AIA-M vs. Con_mRNA_Seq | HGF               | 0.0301 | 1.0278  | Up   |
| AIA-M vs. Con_mRNA_Seq | HIVEP3            | 0.0017 | -1.7890 | Down |
| AIA-M vs. Con_mRNA_Seq | HLX               | 0.0030 | 1.1103  | Up   |
|                        | HSPA1A//HSPA1B//L |        |         |      |
| AIA-M vs. Con_mRNA_Seq | OC108348108       | 0.0154 | -1.5354 | Down |
|                        | HSPA1A//LOC108348 |        |         |      |
| AIA-M vs. Con_mRNA_Seq | 108               | 0.0129 | -1.6746 | Down |
| AIA-M vs. Con_mRNA_Seq | HSPA2             | 0.0381 | 1.8257  | Up   |
| AIA-M vs. Con_mRNA_Seq | HSPB6             | 0.0095 | -1.4183 | Down |
| AIA-M vs. Con_mRNA_Seq | ID1               | 0.0000 | 1.1211  | Up   |
| AIA-M vs. Con_mRNA_Seq | IFIT1             | 0.0000 | 1.4917  | Up   |
| AIA-M vs. Con_mRNA_Seq | IFIT3             | 0.0000 | 1.6551  | Up   |
| AIA-M vs. Con_mRNA_Seq | IKZF5             | 0.0000 | -1.8353 | Down |
| AIA-M vs. Con_mRNA_Seq | IL1B              | 0.0078 | 1.4138  | Up   |
| AIA-M vs. Con_mRNA_Seq | IL22RA2           | 0.0361 | 2.1436  | Up   |

|                        |                    |        |         |      |
|------------------------|--------------------|--------|---------|------|
| AIA-M vs. Con_mRNA_Seq | IL7                | 0.0200 | 3.6803  | Up   |
| AIA-M vs. Con_mRNA_Seq | ITGA5              | 0.0001 | 1.2829  | Up   |
| AIA-M vs. Con_mRNA_Seq | JAML               | 0.0001 | 1.0184  | Up   |
| AIA-M vs. Con_mRNA_Seq | JUN                | 0.0001 | 1.6961  | Up   |
| AIA-M vs. Con_mRNA_Seq | JUND               | 0.0000 | 1.1377  | Up   |
|                        | KATNAL1//LOC10091  |        |         |      |
| AIA-M vs. Con_mRNA_Seq | 0196//LOC103690050 | 0.0248 | 1.5441  | Up   |
| AIA-M vs. Con_mRNA_Seq | KCNK13             | 0.0214 | 2.3729  | Up   |
| AIA-M vs. Con_mRNA_Seq | KCNK5              | 0.0166 | -1.1022 | Down |
| AIA-M vs. Con_mRNA_Seq | KCNS3              | 0.0105 | 1.0348  | Up   |
| AIA-M vs. Con_mRNA_Seq | KCP                | 0.0035 | -1.5882 | Down |
| AIA-M vs. Con_mRNA_Seq | KIFAP3             | 0.0000 | -1.5116 | Down |
| AIA-M vs. Con_mRNA_Seq | KLHL13             | 0.0216 | 2.3729  | Up   |
| AIA-M vs. Con_mRNA_Seq | KLHL25             | 0.0019 | -1.3820 | Down |
| AIA-M vs. Con_mRNA_Seq | KLRA1              | 0.0005 | 1.2788  | Up   |
| AIA-M vs. Con_mRNA_Seq | KLRA22             | 0.0132 | -2.1066 | Down |
| AIA-M vs. Con_mRNA_Seq | KRT80              | 0.0488 | 4.2739  | Up   |
| AIA-M vs. Con_mRNA_Seq | LARGE1             | 0.0112 | 1.0049  | Up   |
| AIA-M vs. Con_mRNA_Seq | LARS2              | 0.0254 | 1.2180  | Up   |
| AIA-M vs. Con_mRNA_Seq | LEXM               | 0.0038 | -4.2771 | Down |
| AIA-M vs. Con_mRNA_Seq | LHFPL6             | 0.0305 | 2.1809  | Up   |
| AIA-M vs. Con_mRNA_Seq | LIPG               | 0.0374 | -1.2935 | Down |
| AIA-M vs. Con_mRNA_Seq | LOC100361934       | 0.0095 | -1.5734 | Down |
| AIA-M vs. Con_mRNA_Seq | LOC100362724       | 0.0134 | -1.4664 | Down |
| AIA-M vs. Con_mRNA_Seq | LOC100909700       | 0.0116 | -2.0239 | Down |
| AIA-M vs. Con_mRNA_Seq | LOC100910792       | 0.0004 | -2.7609 | Down |
| AIA-M vs. Con_mRNA_Seq | LOC100911572       | 0.0339 | -2.3851 | Down |

|                        |                   |        |         |      |
|------------------------|-------------------|--------|---------|------|
| AIA-M vs. Con_mRNA_Seq | LOC100912228      | 0.0074 | 1.0055  | Up   |
| AIA-M vs. Con_mRNA_Seq | LOC100912534      | 0.0242 | 1.7074  | Up   |
| AIA-M vs. Con_mRNA_Seq | LOC102546716      | 0.0064 | -1.5135 | Down |
| AIA-M vs. Con_mRNA_Seq | LOC102550455      | 0.0086 | -1.2006 | Down |
| AIA-M vs. Con_mRNA_Seq | LOC102550543      | 0.0429 | -3.2803 | Down |
| AIA-M vs. Con_mRNA_Seq | LOC102551606      | 0.0002 | -1.0154 | Down |
| AIA-M vs. Con_mRNA_Seq | LOC102552166      | 0.0318 | -1.2249 | Down |
| AIA-M vs. Con_mRNA_Seq | LOC102555023      | 0.0380 | 1.3830  | Up   |
| AIA-M vs. Con_mRNA_Seq | LOC102555038      | 0.0015 | -1.6568 | Down |
| AIA-M vs. Con_mRNA_Seq | LOC102556092      | 0.0026 | 1.1719  | Up   |
| AIA-M vs. Con_mRNA_Seq | LOC103689947      | 0.0097 | -1.1436 | Down |
| AIA-M vs. Con_mRNA_Seq | LOC103689949      | 0.0014 | 2.0670  | Up   |
| AIA-M vs. Con_mRNA_Seq | LOC103689954      | 0.0011 | 1.0917  | Up   |
| AIA-M vs. Con_mRNA_Seq | LOC103689960      | 0.0221 | -1.4032 | Down |
| AIA-M vs. Con_mRNA_Seq | LOC103692167      | 0.0225 | -1.1241 | Down |
| AIA-M vs. Con_mRNA_Seq | LOC103692995      | 0.0473 | -1.2011 | Down |
| AIA-M vs. Con_mRNA_Seq | LOC498154         | 0.0016 | 1.0649  | Up   |
| AIA-M vs. Con_mRNA_Seq | LOC680254         | 0.0278 | 1.5841  | Up   |
| AIA-M vs. Con_mRNA_Seq | LOC680322         | 0.0301 | -1.9543 | Down |
|                        | LOC685157//LOC108 |        |         |      |
| AIA-M vs. Con_mRNA_Seq | 348155            | 0.0398 | 1.0708  | Up   |
| AIA-M vs. Con_mRNA_Seq | LOC688282         | 0.0252 | -1.6940 | Down |
| AIA-M vs. Con_mRNA_Seq | LOC688925         | 0.0305 | -3.1015 | Down |
| AIA-M vs. Con_mRNA_Seq | LOXL3             | 0.0022 | 1.3740  | Up   |
| AIA-M vs. Con_mRNA_Seq | LRATD2            | 0.0000 | 1.4946  | Up   |
| AIA-M vs. Con_mRNA_Seq | LRP8              | 0.0101 | -1.4916 | Down |
| AIA-M vs. Con_mRNA_Seq | LRRC71            | 0.0178 | 1.4124  | Up   |

---

|                        |                  |        |         |      |
|------------------------|------------------|--------|---------|------|
| AIA-M vs. Con_mRNA_Seq | LTC4S            | 0.0077 | 4.9559  | Up   |
| AIA-M vs. Con_mRNA_Seq | LXN              | 0.0171 | 1.7025  | Up   |
| AIA-M vs. Con_mRNA_Seq | LY49SI2//LY49SI3 | 0.0301 | 2.4436  | Up   |
| AIA-M vs. Con_mRNA_Seq | LY6G6F           | 0.0043 | 1.0222  | Up   |
| AIA-M vs. Con_mRNA_Seq | LYPLAL1          | 0.0113 | 4.3395  | Up   |
| AIA-M vs. Con_mRNA_Seq | LYSMD4           | 0.0375 | -1.2065 | Down |
| AIA-M vs. Con_mRNA_Seq | LYVE1            | 0.0023 | 1.0159  | Up   |
| AIA-M vs. Con_mRNA_Seq | MAP6             | 0.0128 | 1.3777  | Up   |
| AIA-M vs. Con_mRNA_Seq | MAPK8IP1         | 0.0317 | 2.5304  | Up   |
| AIA-M vs. Con_mRNA_Seq | MARCKS           | 0.0003 | 1.0128  | Up   |
| AIA-M vs. Con_mRNA_Seq | MAST2            | 0.0044 | -1.1431 | Down |
| AIA-M vs. Con_mRNA_Seq | MCPT1L1          | 0.0003 | 1.8206  | Up   |
| AIA-M vs. Con_mRNA_Seq | MDM1             | 0.0017 | 1.1322  | Up   |
| AIA-M vs. Con_mRNA_Seq | MED9             | 0.0134 | 1.4502  | Up   |
| AIA-M vs. Con_mRNA_Seq | MEPE             | 0.0130 | 4.9576  | Up   |
| AIA-M vs. Con_mRNA_Seq | MEST             | 0.0296 | 1.5656  | Up   |
| AIA-M vs. Con_mRNA_Seq | METRNL           | 0.0289 | -1.2884 | Down |
| AIA-M vs. Con_mRNA_Seq | MICALL2          | 0.0005 | -1.3657 | Down |
| AIA-M vs. Con_mRNA_Seq | MIR5132          | 0.0155 | -1.4769 | Down |
| AIA-M vs. Con_mRNA_Seq | MMRN1            | 0.0026 | 1.0609  | Up   |
| AIA-M vs. Con_mRNA_Seq | MMRN2            | 0.0275 | -2.8201 | Down |
| AIA-M vs. Con_mRNA_Seq | MRVI1            | 0.0113 | 1.0361  | Up   |
| AIA-M vs. Con_mRNA_Seq | MSRA             | 0.0266 | 1.8396  | Up   |
| AIA-M vs. Con_mRNA_Seq | MUC1             | 0.0086 | 2.3010  | Up   |
| AIA-M vs. Con_mRNA_Seq | MYCT1            | 0.0058 | 1.1718  | Up   |
| AIA-M vs. Con_mRNA_Seq | MYL9             | 0.0009 | 1.2004  | Up   |

---

---

N4BP3//LOC1036899

|                        |         |        |         |      |
|------------------------|---------|--------|---------|------|
| AIA-M vs. Con_mRNA_Seq | 49      | 0.0017 | 2.0777  | Up   |
| AIA-M vs. Con_mRNA_Seq | NANP    | 0.0311 | -1.0680 | Down |
| AIA-M vs. Con_mRNA_Seq | NCAPG   | 0.0011 | -2.1619 | Down |
| AIA-M vs. Con_mRNA_Seq | NCEH1   | 0.0019 | 1.0923  | Up   |
| AIA-M vs. Con_mRNA_Seq | NEDD4L  | 0.0024 | -1.0062 | Down |
| AIA-M vs. Con_mRNA_Seq | NGFR    | 0.0088 | -1.0127 | Down |
| AIA-M vs. Con_mRNA_Seq | NGP     | 0.0008 | -1.6765 | Down |
| AIA-M vs. Con_mRNA_Seq | NIACR1  | 0.0006 | 1.5101  | Up   |
| AIA-M vs. Con_mRNA_Seq | NLRP3   | 0.0001 | 1.4900  | Up   |
| AIA-M vs. Con_mRNA_Seq | NMT2    | 0.0000 | -1.6290 | Down |
| AIA-M vs. Con_mRNA_Seq | NR4A2   | 0.0118 | -1.2631 | Down |
| AIA-M vs. Con_mRNA_Seq | NR4A3   | 0.0408 | -1.4472 | Down |
| AIA-M vs. Con_mRNA_Seq | NRG2    | 0.0157 | 4.3541  | Up   |
| AIA-M vs. Con_mRNA_Seq | NRGN    | 0.0008 | 1.1404  | Up   |
| AIA-M vs. Con_mRNA_Seq | NRIP3   | 0.0188 | 1.1768  | Up   |
| AIA-M vs. Con_mRNA_Seq | NUPR1   | 0.0106 | 5.2624  | Up   |
| AIA-M vs. Con_mRNA_Seq | NUPR1L1 | 0.0115 | 5.2231  | Up   |
| AIA-M vs. Con_mRNA_Seq | OASL    | 0.0001 | 1.1970  | Up   |
| AIA-M vs. Con_mRNA_Seq | OBSL1   | 0.0488 | 1.6679  | Up   |
| AIA-M vs. Con_mRNA_Seq | OLFM4   | 0.0065 | -1.0349 | Down |
| AIA-M vs. Con_mRNA_Seq | OPTN    | 0.0148 | -1.1208 | Down |
| AIA-M vs. Con_mRNA_Seq | ORAI1   | 0.0003 | 1.1646  | Up   |
| AIA-M vs. Con_mRNA_Seq | OSGIN1  | 0.0003 | 1.2142  | Up   |
| AIA-M vs. Con_mRNA_Seq | OSM     | 0.0000 | 1.5136  | Up   |
| AIA-M vs. Con_mRNA_Seq | P2RX4   | 0.0002 | 1.0018  | Up   |
| AIA-M vs. Con_mRNA_Seq | PAQR3   | 0.0040 | -1.8678 | Down |

---



|                        |         |        |         |      |
|------------------------|---------|--------|---------|------|
| AIA-M vs. Con_mRNA_Seq | PCDHGB5 | 0.0262 | -3.9559 | Down |
| AIA-M vs. Con_mRNA_Seq | PCGF3   | 0.0009 | 1.3573  | Up   |
| AIA-M vs. Con_mRNA_Seq | PCLO    | 0.0394 | -1.9650 | Down |
| AIA-M vs. Con_mRNA_Seq | PDE3A   | 0.0116 | 1.0241  | Up   |
| AIA-M vs. Con_mRNA_Seq | PELI2   | 0.0371 | 3.2349  | Up   |
| AIA-M vs. Con_mRNA_Seq | PEX10   | 0.0181 | 2.7096  | Up   |
| AIA-M vs. Con_mRNA_Seq | PF4     | 0.0007 | 1.2675  | Up   |
| AIA-M vs. Con_mRNA_Seq | PIH1D1  | 0.0109 | -1.0603 | Down |
| AIA-M vs. Con_mRNA_Seq | PKIA    | 0.0016 | 1.2370  | Up   |
| AIA-M vs. Con_mRNA_Seq | PLA2G2A | 0.0003 | 1.3067  | Up   |
| AIA-M vs. Con_mRNA_Seq | PLEKHG1 | 0.0051 | -2.3095 | Down |
| AIA-M vs. Con_mRNA_Seq | PLOD2   | 0.0338 | 1.3673  | Up   |
| AIA-M vs. Con_mRNA_Seq | PLPP3   | 0.0106 | 2.4407  | Up   |
| AIA-M vs. Con_mRNA_Seq | PLTP    | 0.0003 | 1.4100  | Up   |
| AIA-M vs. Con_mRNA_Seq | PMP22   | 0.0031 | -1.7572 | Down |
| AIA-M vs. Con_mRNA_Seq | POLR2H  | 0.0088 | 2.1539  | Up   |
| AIA-M vs. Con_mRNA_Seq | POMC    | 0.0449 | 5.0129  | Up   |
| AIA-M vs. Con_mRNA_Seq | PPIF    | 0.0030 | 1.0631  | Up   |
| AIA-M vs. Con_mRNA_Seq | PPP1R3B | 0.0019 | 1.0795  | Up   |
| AIA-M vs. Con_mRNA_Seq | PROS1   | 0.0156 | 2.2391  | Up   |
| AIA-M vs. Con_mRNA_Seq | PROSER2 | 0.0106 | 2.4378  | Up   |
| AIA-M vs. Con_mRNA_Seq | PRXL2A  | 0.0254 | -1.0486 | Down |
| AIA-M vs. Con_mRNA_Seq | PTPN13  | 0.0158 | 4.1086  | Up   |
| AIA-M vs. Con_mRNA_Seq | QRSL1   | 0.0309 | -1.3194 | Down |
| AIA-M vs. Con_mRNA_Seq | RAB26   | 0.0460 | -1.1139 | Down |
| AIA-M vs. Con_mRNA_Seq | RAB3IL1 | 0.0189 | -1.1683 | Down |
| AIA-M vs. Con_mRNA_Seq | RAD54L2 | 0.0061 | -1.0560 | Down |

|                        |                  |        |         |      |
|------------------------|------------------|--------|---------|------|
| AIA-M vs. Con_mRNA_Seq | RASL10A          | 0.0028 | 1.1205  | Up   |
| AIA-M vs. Con_mRNA_Seq | RBPJL            | 0.0431 | -4.5238 | Down |
| AIA-M vs. Con_mRNA_Seq | REEP2            | 0.0048 | 1.0181  | Up   |
| AIA-M vs. Con_mRNA_Seq | REXO5            | 0.0408 | -1.4795 | Down |
| AIA-M vs. Con_mRNA_Seq | RFX2             | 0.0227 | -1.0409 | Down |
| AIA-M vs. Con_mRNA_Seq | RGD1307621       | 0.0382 | -1.6219 | Down |
|                        | RGD1560020_PREDI |        |         |      |
| AIA-M vs. Con_mRNA_Seq | CTED             | 0.0074 | -1.3435 | Down |
| AIA-M vs. Con_mRNA_Seq | RGD1560455       | 0.0019 | -1.1466 | Down |
| AIA-M vs. Con_mRNA_Seq | RGD1564664       | 0.0486 | 1.4050  | Up   |
| AIA-M vs. Con_mRNA_Seq | RGD1565785       | 0.0391 | 1.1993  | Up   |
| AIA-M vs. Con_mRNA_Seq | RGSL1            | 0.0080 | 2.6706  | Up   |
| AIA-M vs. Con_mRNA_Seq | RHOB             | 0.0000 | 1.1005  | Up   |
| AIA-M vs. Con_mRNA_Seq | RHOC             | 0.0404 | 1.1268  | Up   |
| AIA-M vs. Con_mRNA_Seq | RHOV             | 0.0000 | 1.3743  | Up   |
| AIA-M vs. Con_mRNA_Seq | RMDN3            | 0.0077 | -1.1777 | Down |
| AIA-M vs. Con_mRNA_Seq | RNF150           | 0.0319 | 1.2786  | Up   |
| AIA-M vs. Con_mRNA_Seq | RNF217           | 0.0339 | 1.4001  | Up   |
| AIA-M vs. Con_mRNA_Seq | RPAP1            | 0.0027 | 1.0304  | Up   |
| AIA-M vs. Con_mRNA_Seq | RPP25            | 0.0048 | 1.8057  | Up   |
| AIA-M vs. Con_mRNA_Seq | RT1-HA           | 0.0248 | -1.3847 | Down |
| AIA-M vs. Con_mRNA_Seq | RTP4             | 0.0350 | -1.1421 | Down |
| AIA-M vs. Con_mRNA_Seq | S100A13          | 0.0191 | 1.0713  | Up   |
| AIA-M vs. Con_mRNA_Seq | SCAI             | 0.0173 | -1.2765 | Down |
| AIA-M vs. Con_mRNA_Seq | SCARF1           | 0.0006 | 1.7774  | Up   |
| AIA-M vs. Con_mRNA_Seq | SCHIP1           | 0.0188 | 1.4847  | Up   |
| AIA-M vs. Con_mRNA_Seq | SCRN3            | 0.0222 | 1.0721  | Up   |

---

|                        |          |        |         |      |
|------------------------|----------|--------|---------|------|
| AIA-M vs. Con_mRNA_Seq | SDC4     | 0.0381 | -1.5525 | Down |
| AIA-M vs. Con_mRNA_Seq | SEC14L5  | 0.0134 | 1.3750  | Up   |
| AIA-M vs. Con_mRNA_Seq | SELENBP1 | 0.0245 | -1.1029 | Down |
| AIA-M vs. Con_mRNA_Seq | SELP     | 0.0029 | 1.2168  | Up   |
| AIA-M vs. Con_mRNA_Seq | SEMA3G   | 0.0014 | 1.0387  | Up   |
| AIA-M vs. Con_mRNA_Seq | SEMA5A   | 0.0110 | 2.8501  | Up   |
| AIA-M vs. Con_mRNA_Seq | SEMA6B   | 0.0009 | 1.3686  | Up   |
| AIA-M vs. Con_mRNA_Seq | SEPT10   | 0.0426 | -1.7620 | Down |
| AIA-M vs. Con_mRNA_Seq | SERINC2  | 0.0000 | 1.4189  | Up   |
| AIA-M vs. Con_mRNA_Seq | SERPINE2 | 0.0383 | 2.2082  | Up   |
| AIA-M vs. Con_mRNA_Seq | SERPINI2 | 0.0165 | 3.7645  | Up   |
| AIA-M vs. Con_mRNA_Seq | SETDB2   | 0.0350 | 1.5217  | Up   |
| AIA-M vs. Con_mRNA_Seq | SGCB     | 0.0355 | -1.0415 | Down |
| AIA-M vs. Con_mRNA_Seq | SH3BGR   | 0.0004 | 2.4272  | Up   |
| AIA-M vs. Con_mRNA_Seq | SHPK     | 0.0005 | 1.0305  | Up   |
| AIA-M vs. Con_mRNA_Seq | SIGLEC5  | 0.0001 | 2.2340  | Up   |
| AIA-M vs. Con_mRNA_Seq | SLC12A2  | 0.0002 | 1.0832  | Up   |
| AIA-M vs. Con_mRNA_Seq | SLC13A5  | 0.0331 | 1.8593  | Up   |
| AIA-M vs. Con_mRNA_Seq | SLC24A5  | 0.0301 | 1.0299  | Up   |
| AIA-M vs. Con_mRNA_Seq | SLC26A2  | 0.0225 | 1.1763  | Up   |
| AIA-M vs. Con_mRNA_Seq | SLC45A4  | 0.0066 | 1.3026  | Up   |
| AIA-M vs. Con_mRNA_Seq | SLC48A1  | 0.0393 | -1.0079 | Down |
| AIA-M vs. Con_mRNA_Seq | SLC6A4   | 0.0021 | 1.0946  | Up   |
| AIA-M vs. Con_mRNA_Seq | SLC6A9   | 0.0485 | -1.1161 | Down |
| AIA-M vs. Con_mRNA_Seq | SMPDL3B  | 0.0071 | 1.0133  | Up   |
| AIA-M vs. Con_mRNA_Seq | SMYD5    | 0.0397 | 1.0642  | Up   |
| AIA-M vs. Con_mRNA_Seq | SOCS3    | 0.0003 | 1.0616  | Up   |

---

|                        |                   |        |         |      |
|------------------------|-------------------|--------|---------|------|
| AIA-M vs. Con_mRNA_Seq | SPAG5             | 0.0240 | -1.2852 | Down |
| AIA-M vs. Con_mRNA_Seq | SPDYA             | 0.0003 | -5.7343 | Down |
| AIA-M vs. Con_mRNA_Seq | SPNS3             | 0.0473 | 1.5093  | Up   |
|                        | SPON2//LOC1009107 |        |         |      |
| AIA-M vs. Con_mRNA_Seq | 90                | 0.0471 | 2.2389  | Up   |
| AIA-M vs. Con_mRNA_Seq | SPR               | 0.0376 | -1.0121 | Down |
| AIA-M vs. Con_mRNA_Seq | SPTB              | 0.0121 | -1.1604 | Down |
| AIA-M vs. Con_mRNA_Seq | STAMBP            | 0.0109 | -1.0631 | Down |
| AIA-M vs. Con_mRNA_Seq | STOML1            | 0.0211 | 1.3810  | Up   |
| AIA-M vs. Con_mRNA_Seq | STON2             | 0.0063 | 1.8772  | Up   |
| AIA-M vs. Con_mRNA_Seq | STXBP4            | 0.0417 | -2.0812 | Down |
| AIA-M vs. Con_mRNA_Seq | SYT5              | 0.0003 | 1.1579  | Up   |
| AIA-M vs. Con_mRNA_Seq | SYTL4             | 0.0402 | 1.6712  | Up   |
| AIA-M vs. Con_mRNA_Seq | TAL1              | 0.0073 | 1.0319  | Up   |
| AIA-M vs. Con_mRNA_Seq | TASP1             | 0.0356 | -1.2363 | Down |
| AIA-M vs. Con_mRNA_Seq | TBCEL             | 0.0280 | -1.1219 | Down |
| AIA-M vs. Con_mRNA_Seq | TCTEX1D4          | 0.0462 | -3.8619 | Down |
| AIA-M vs. Con_mRNA_Seq | TDRKH             | 0.0121 | 1.6143  | Up   |
| AIA-M vs. Con_mRNA_Seq | TEX14             | 0.0316 | -4.5866 | Down |
| AIA-M vs. Con_mRNA_Seq | THBS1             | 0.0086 | 1.0434  | Up   |
| AIA-M vs. Con_mRNA_Seq | TLR5              | 0.0167 | 1.1053  | Up   |
| AIA-M vs. Con_mRNA_Seq | TMEM51            | 0.0065 | 3.9376  | Up   |
| AIA-M vs. Con_mRNA_Seq | TMEM56            | 0.0015 | 1.7935  | Up   |
| AIA-M vs. Con_mRNA_Seq | TNFAIP2           | 0.0009 | 1.2803  | Up   |
| AIA-M vs. Con_mRNA_Seq | TP53TG5           | 0.0109 | 4.6235  | Up   |
|                        | TPRKB//LOC1036900 |        |         |      |
| AIA-M vs. Con_mRNA_Seq | 67                | 0.0010 | -1.6372 | Down |

---

|                        |                    |        |         |      |
|------------------------|--------------------|--------|---------|------|
| AIA-M vs. Con_mRNA_Seq | TRAIP              | 0.0140 | 4.2532  | Up   |
| AIA-M vs. Con_mRNA_Seq | TREML1             | 0.0069 | 1.0076  | Up   |
| AIA-M vs. Con_mRNA_Seq | TREML4             | 0.0037 | -1.1950 | Down |
| AIA-M vs. Con_mRNA_Seq | TRIM13             | 0.0109 | 1.3526  | Up   |
| AIA-M vs. Con_mRNA_Seq | TRIM17             | 0.0278 | 1.6098  | Up   |
| AIA-M vs. Con_mRNA_Seq | TRIM72             | 0.0105 | 1.2347  | Up   |
| AIA-M vs. Con_mRNA_Seq | TSPY26             | 0.0041 | -1.7901 | Down |
| AIA-M vs. Con_mRNA_Seq | TTC30B             | 0.0045 | 2.4533  | Up   |
| AIA-M vs. Con_mRNA_Seq | TYRO3              | 0.0372 | 1.0424  | Up   |
| AIA-M vs. Con_mRNA_Seq | UNC13B             | 0.0047 | 1.2061  | Up   |
| AIA-M vs. Con_mRNA_Seq | VEGFA              | 0.0025 | 2.3371  | Up   |
| AIA-M vs. Con_mRNA_Seq | VKORC1L1           | 0.0031 | -1.4402 | Down |
| AIA-M vs. Con_mRNA_Seq | VPREB3             | 0.0360 | -1.6525 | Down |
| AIA-M vs. Con_mRNA_Seq | VSIG2              | 0.0204 | 1.4849  | Up   |
| AIA-M vs. Con_mRNA_Seq | VWF                | 0.0005 | 1.0792  | Up   |
| AIA-M vs. Con_mRNA_Seq | WIPF3              | 0.0012 | -1.5561 | Down |
| AIA-M vs. Con_mRNA_Seq | WNT2               | 0.0406 | 2.4945  | Up   |
| AIA-M vs. Con_mRNA_Seq | XKR8               | 0.0050 | 1.0216  | Up   |
| AIA-M vs. Con_mRNA_Seq | YAP1               | 0.0060 | 2.6466  | Up   |
| AIA-M vs. Con_mRNA_Seq | ZBTB20             | 0.0344 | -1.5200 | Down |
| AIA-M vs. Con_mRNA_Seq | ZCCHC12            | 0.0010 | 3.7146  | Up   |
| AIA-M vs. Con_mRNA_Seq | ZFP1               | 0.0240 | 1.2585  | Up   |
| AIA-M vs. Con_mRNA_Seq | ZFP286A            | 0.0438 | -1.4919 | Down |
| AIA-M vs. Con_mRNA_Seq | ZFP36              | 0.0000 | 1.1974  | Up   |
| AIA-M vs. Con_mRNA_Seq | ZFP780B-PS1        | 0.0081 | -1.6098 | Down |
| AIA-M vs. Con_mRNA_Seq | ZIK1               | 0.0086 | 4.5098  | Up   |
| AIA-M vs. Con_mRNA_Seq | ZIK1//LOC100911224 | 0.0103 | 4.4248  | Up   |

---

|                          |         |        |         |      |
|--------------------------|---------|--------|---------|------|
| AIA-M vs. Con_mRNA_Seq   | ZSCAN21 | 0.0000 | -1.3327 | Down |
| BHGZD vs. AIA-M_mRNA_Seq | AAMP    | 0.0107 | -1.0302 | Down |
| BHGZD vs. AIA-M_mRNA_Seq | ABCA4   | 0.0093 | -1.2777 | Down |
| BHGZD vs. AIA-M_mRNA_Seq | ABCB6   | 0.0007 | -1.1470 | Down |
| BHGZD vs. AIA-M_mRNA_Seq | ABCC4   | 0.0063 | -1.0376 | Down |
| BHGZD vs. AIA-M_mRNA_Seq | ABCG4   | 0.0251 | -1.9310 | Down |
| BHGZD vs. AIA-M_mRNA_Seq | ABHD4   | 0.0051 | -1.1666 | Down |
| BHGZD vs. AIA-M_mRNA_Seq | ABI2    | 0.0014 | -1.1421 | Down |
| BHGZD vs. AIA-M_mRNA_Seq | ABTB1   | 0.0014 | -1.2998 | Down |
| BHGZD vs. AIA-M_mRNA_Seq | ACER2   | 0.0000 | -1.3738 | Down |
| BHGZD vs. AIA-M_mRNA_Seq | ACHE    | 0.0034 | -1.3507 | Down |
| BHGZD vs. AIA-M_mRNA_Seq | ADCK5   | 0.0137 | -1.1067 | Down |
| BHGZD vs. AIA-M_mRNA_Seq | ADCY1   | 0.0476 | -2.2888 | Down |
| BHGZD vs. AIA-M_mRNA_Seq | ADCY5   | 0.0001 | -1.4196 | Down |
| BHGZD vs. AIA-M_mRNA_Seq | ADCY9   | 0.0043 | -1.2446 | Down |
| BHGZD vs. AIA-M_mRNA_Seq | ADD2    | 0.0025 | -1.3714 | Down |
| BHGZD vs. AIA-M_mRNA_Seq | ADGRA2  | 0.0002 | -1.4634 | Down |
| BHGZD vs. AIA-M_mRNA_Seq | ADIPOR1 | 0.0011 | -1.4399 | Down |
| BHGZD vs. AIA-M_mRNA_Seq | ADK     | 0.0002 | -1.0966 | Down |
| BHGZD vs. AIA-M_mRNA_Seq | AEN     | 0.0032 | -1.1175 | Down |
| BHGZD vs. AIA-M_mRNA_Seq | AGAP1   | 0.0007 | -1.2636 | Down |
| BHGZD vs. AIA-M_mRNA_Seq | AGO2    | 0.0011 | -1.4280 | Down |
| BHGZD vs. AIA-M_mRNA_Seq | AGPAT5  | 0.0001 | -1.0730 | Down |
| BHGZD vs. AIA-M_mRNA_Seq | AGRP    | 0.0001 | -2.2359 | Down |
| BHGZD vs. AIA-M_mRNA_Seq | AHSP    | 0.0133 | -1.3125 | Down |
| BHGZD vs. AIA-M_mRNA_Seq | AKR7A3  | 0.0035 | -1.3361 | Down |
| BHGZD vs. AIA-M_mRNA_Seq | AKT3    | 0.0001 | -1.2611 | Down |

|                          |                   |        |         |      |
|--------------------------|-------------------|--------|---------|------|
| BHGZD vs. AIA-M_mRNA_Seq | ALAD              | 0.0066 | -1.2525 | Down |
| BHGZD vs. AIA-M_mRNA_Seq | ALAS2             | 0.0010 | -1.6221 | Down |
| BHGZD vs. AIA-M_mRNA_Seq | ALDOC             | 0.0036 | -1.3832 | Down |
| BHGZD vs. AIA-M_mRNA_Seq | ALOX12            | 0.0000 | -1.4374 | Down |
| BHGZD vs. AIA-M_mRNA_Seq | ALOX15            | 0.0220 | -1.7222 | Down |
| BHGZD vs. AIA-M_mRNA_Seq | AMD1              | 0.0003 | -1.0269 | Down |
| BHGZD vs. AIA-M_mRNA_Seq | AMER1             | 0.0215 | 1.5514  | Up   |
| BHGZD vs. AIA-M_mRNA_Seq | AMFR              | 0.0010 | -1.5027 | Down |
| BHGZD vs. AIA-M_mRNA_Seq | ANGPT1            | 0.0001 | -1.1717 | Down |
| BHGZD vs. AIA-M_mRNA_Seq | ANGPTL2           | 0.0384 | -2.6154 | Down |
| BHGZD vs. AIA-M_mRNA_Seq | ANK1              | 0.0101 | -1.2299 | Down |
| BHGZD vs. AIA-M_mRNA_Seq | ANKS6             | 0.0465 | 2.1130  | Up   |
| BHGZD vs. AIA-M_mRNA_Seq | ANO6              | 0.0001 | -1.0585 | Down |
| BHGZD vs. AIA-M_mRNA_Seq | AP2M1             | 0.0007 | -1.0612 | Down |
| BHGZD vs. AIA-M_mRNA_Seq | AP3S1             | 0.0004 | -1.0338 | Down |
| BHGZD vs. AIA-M_mRNA_Seq | APCDD1L           | 0.0482 | 3.8063  | Up   |
|                          | APH1B//LOC1083480 |        |         |      |
| BHGZD vs. AIA-M_mRNA_Seq | 64                | 0.0003 | -1.0032 | Down |
| BHGZD vs. AIA-M_mRNA_Seq | APOA2             | 0.0458 | 2.5232  | Up   |
| BHGZD vs. AIA-M_mRNA_Seq | AQP1              | 0.0076 | -1.2653 | Down |
| BHGZD vs. AIA-M_mRNA_Seq | ARF3//FKBP11      | 0.0034 | -1.0636 | Down |
| BHGZD vs. AIA-M_mRNA_Seq | ARF5              | 0.0007 | -1.6146 | Down |
| BHGZD vs. AIA-M_mRNA_Seq | ARHGAP10          | 0.0000 | -1.3165 | Down |
| BHGZD vs. AIA-M_mRNA_Seq | ARHGAP28          | 0.0006 | -1.1830 | Down |
| BHGZD vs. AIA-M_mRNA_Seq | ARHGAP6           | 0.0022 | -1.2358 | Down |
| BHGZD vs. AIA-M_mRNA_Seq | ARHGEF12          | 0.0014 | -1.3088 | Down |
| BHGZD vs. AIA-M_mRNA_Seq | ARHGEF37          | 0.0123 | -1.3564 | Down |

|                          |                   |        |         |      |
|--------------------------|-------------------|--------|---------|------|
| BHGZD vs. AIA-M_mRNA_Seq | ARHGEF9           | 0.0257 | 2.0776  | Up   |
| BHGZD vs. AIA-M_mRNA_Seq | ARL2              | 0.0036 | -1.2377 | Down |
| BHGZD vs. AIA-M_mRNA_Seq | ARPC2             | 0.0019 | -1.1846 | Down |
|                          | ARPP19//LOC100360 |        |         |      |
| BHGZD vs. AIA-M_mRNA_Seq | 828               | 0.0217 | -1.1836 | Down |
| BHGZD vs. AIA-M_mRNA_Seq | ARSI              | 0.0066 | 2.9481  | Up   |
| BHGZD vs. AIA-M_mRNA_Seq | ASAP2             | 0.0225 | -1.0137 | Down |
| BHGZD vs. AIA-M_mRNA_Seq | ASB1              | 0.0017 | -1.3956 | Down |
| BHGZD vs. AIA-M_mRNA_Seq | ASB15             | 0.0001 | -2.4716 | Down |
| BHGZD vs. AIA-M_mRNA_Seq | ASF1B             | 0.0041 | -1.2976 | Down |
| BHGZD vs. AIA-M_mRNA_Seq | ASNA1             | 0.0014 | -1.2627 | Down |
| BHGZD vs. AIA-M_mRNA_Seq | ASTN1             | 0.0000 | -1.4422 | Down |
| BHGZD vs. AIA-M_mRNA_Seq | ATF5              | 0.0144 | -1.7147 | Down |
| BHGZD vs. AIA-M_mRNA_Seq | ATOX1             | 0.0012 | -1.1513 | Down |
| BHGZD vs. AIA-M_mRNA_Seq | ATP1B1            | 0.0007 | 1.2697  | Up   |
| BHGZD vs. AIA-M_mRNA_Seq | ATP1B2            | 0.0453 | -1.0145 | Down |
| BHGZD vs. AIA-M_mRNA_Seq | ATP5F1B           | 0.0023 | -1.3325 | Down |
| BHGZD vs. AIA-M_mRNA_Seq | ATP5IF1           | 0.0022 | -1.4060 | Down |
| BHGZD vs. AIA-M_mRNA_Seq | ATP5MF            | 0.0120 | -1.0865 | Down |
| BHGZD vs. AIA-M_mRNA_Seq | ATP5MG            | 0.0013 | -1.4043 | Down |
| BHGZD vs. AIA-M_mRNA_Seq | ATP5PD            | 0.0011 | -1.2698 | Down |
| BHGZD vs. AIA-M_mRNA_Seq | ATP5PO            | 0.0044 | -1.0386 | Down |
| BHGZD vs. AIA-M_mRNA_Seq | ATP6AP1L          | 0.0017 | -1.7003 | Down |
| BHGZD vs. AIA-M_mRNA_Seq | ATP6V1F           | 0.0007 | -1.4106 | Down |
| BHGZD vs. AIA-M_mRNA_Seq | ATP6V1FNB         | 0.0397 | 4.3882  | Up   |
| BHGZD vs. AIA-M_mRNA_Seq | ATP7B             | 0.0016 | -1.9597 | Down |
| BHGZD vs. AIA-M_mRNA_Seq | ATP8A1            | 0.0001 | -1.1367 | Down |



|                          |          |        |         |      |
|--------------------------|----------|--------|---------|------|
| BHGZD vs. AIA-M_mRNA_Seq | ATP8B5P  | 0.0033 | -2.6232 | Down |
| BHGZD vs. AIA-M_mRNA_Seq | AUP1     | 0.0020 | -1.2665 | Down |
| BHGZD vs. AIA-M_mRNA_Seq | B2M      | 0.0007 | -1.2009 | Down |
| BHGZD vs. AIA-M_mRNA_Seq | B3GALNT1 | 0.0321 | 3.0816  | Up   |
| BHGZD vs. AIA-M_mRNA_Seq | BAG6     | 0.0007 | -1.3772 | Down |
| BHGZD vs. AIA-M_mRNA_Seq | BARD1    | 0.0023 | -1.1967 | Down |
| BHGZD vs. AIA-M_mRNA_Seq | BBIP1    | 0.0100 | -1.0169 | Down |
| BHGZD vs. AIA-M_mRNA_Seq | BCAS2    | 0.0011 | -1.5315 | Down |
| BHGZD vs. AIA-M_mRNA_Seq | BCL11A   | 0.0208 | 1.1655  | Up   |
| BHGZD vs. AIA-M_mRNA_Seq | BCL2L1   | 0.0046 | -1.2943 | Down |
| BHGZD vs. AIA-M_mRNA_Seq | BCO1     | 0.0020 | -1.2627 | Down |
| BHGZD vs. AIA-M_mRNA_Seq | BCS1L    | 0.0334 | 1.8381  | Up   |
| BHGZD vs. AIA-M_mRNA_Seq | BEST1    | 0.0003 | -1.3829 | Down |
| BHGZD vs. AIA-M_mRNA_Seq | BFSP2    | 0.0004 | -1.5460 | Down |
| BHGZD vs. AIA-M_mRNA_Seq | BGLAP    | 0.0003 | -1.3003 | Down |
| BHGZD vs. AIA-M_mRNA_Seq | BGN      | 0.0000 | -1.4733 | Down |
| BHGZD vs. AIA-M_mRNA_Seq | BIVM     | 0.0263 | 1.4631  | Up   |
| BHGZD vs. AIA-M_mRNA_Seq | BLES03   | 0.0139 | -1.0254 | Down |
| BHGZD vs. AIA-M_mRNA_Seq | BLVRB    | 0.0033 | -1.3744 | Down |
| BHGZD vs. AIA-M_mRNA_Seq | BNIP3L   | 0.0011 | -1.5070 | Down |
| BHGZD vs. AIA-M_mRNA_Seq | BOLA3    | 0.0015 | -1.4669 | Down |
| BHGZD vs. AIA-M_mRNA_Seq | BORCS8   | 0.0028 | -1.3322 | Down |
| BHGZD vs. AIA-M_mRNA_Seq | BPGM     | 0.0023 | -1.3788 | Down |
| BHGZD vs. AIA-M_mRNA_Seq | BPHL     | 0.0019 | 4.8637  | Up   |
| BHGZD vs. AIA-M_mRNA_Seq | BPIFA6   | 0.0027 | -1.3520 | Down |
| BHGZD vs. AIA-M_mRNA_Seq | BRICD5   | 0.0112 | -4.5770 | Down |
| BHGZD vs. AIA-M_mRNA_Seq | BSDC1    | 0.0020 | -1.5832 | Down |

|                          |                   |        |         |      |
|--------------------------|-------------------|--------|---------|------|
| BHGZD vs. AIA-M_mRNA_Seq | BTLA              | 0.0059 | 1.0449  | Up   |
| BHGZD vs. AIA-M_mRNA_Seq | BUD31             | 0.0064 | -1.2633 | Down |
| BHGZD vs. AIA-M_mRNA_Seq | C1QL4             | 0.0121 | -5.9619 | Down |
| BHGZD vs. AIA-M_mRNA_Seq | CA11              | 0.0118 | -1.4098 | Down |
| BHGZD vs. AIA-M_mRNA_Seq | CABYR             | 0.0037 | -1.2199 | Down |
| BHGZD vs. AIA-M_mRNA_Seq | CACNG3            | 0.0276 | -1.1138 | Down |
| BHGZD vs. AIA-M_mRNA_Seq | CADM4             | 0.0163 | -4.2839 | Down |
| BHGZD vs. AIA-M_mRNA_Seq | CALD1             | 0.0001 | -1.5063 | Down |
| BHGZD vs. AIA-M_mRNA_Seq | CALR              | 0.0049 | -1.0703 | Down |
| BHGZD vs. AIA-M_mRNA_Seq | CAMKV             | 0.0340 | -2.3783 | Down |
| BHGZD vs. AIA-M_mRNA_Seq | CAPN8             | 0.0457 | -1.2357 | Down |
|                          | CAPNS1//LOC100911 |        |         |      |
| BHGZD vs. AIA-M_mRNA_Seq | 363               | 0.0064 | -1.1181 | Down |
| BHGZD vs. AIA-M_mRNA_Seq | CAR1              | 0.0376 | -1.1403 | Down |
| BHGZD vs. AIA-M_mRNA_Seq | CAR2              | 0.0018 | -1.4741 | Down |
| BHGZD vs. AIA-M_mRNA_Seq | CARHSP1           | 0.0003 | -1.6610 | Down |
| BHGZD vs. AIA-M_mRNA_Seq | CASP12            | 0.0236 | 2.2173  | Up   |
| BHGZD vs. AIA-M_mRNA_Seq | CAT               | 0.0085 | -1.1279 | Down |
| BHGZD vs. AIA-M_mRNA_Seq | CAVIN1            | 0.0028 | -1.8521 | Down |
| BHGZD vs. AIA-M_mRNA_Seq | CAVIN2            | 0.0025 | -1.2540 | Down |
| BHGZD vs. AIA-M_mRNA_Seq | CBLN2             | 0.0000 | -1.5381 | Down |
| BHGZD vs. AIA-M_mRNA_Seq | CBX5              | 0.0030 | 1.1093  | Up   |
| BHGZD vs. AIA-M_mRNA_Seq | CCDC112           | 0.0179 | 1.2179  | Up   |
| BHGZD vs. AIA-M_mRNA_Seq | CCDC126           | 0.0156 | -1.0977 | Down |
| BHGZD vs. AIA-M_mRNA_Seq | CCDC127           | 0.0368 | 1.4294  | Up   |
| BHGZD vs. AIA-M_mRNA_Seq | CCDC189           | 0.0011 | -1.5718 | Down |
| BHGZD vs. AIA-M_mRNA_Seq | CCDC92            | 0.0001 | -1.7041 | Down |

|                          |                   |        |         |      |
|--------------------------|-------------------|--------|---------|------|
| BHGZD vs. AIA-M_mRNA_Seq | CCN1              | 0.0067 | 1.0189  | Up   |
| BHGZD vs. AIA-M_mRNA_Seq | CCNJL             | 0.0003 | -1.3404 | Down |
| BHGZD vs. AIA-M_mRNA_Seq | CCR3              | 0.0110 | -1.0801 | Down |
|                          | CD151//LOC1009117 |        |         |      |
| BHGZD vs. AIA-M_mRNA_Seq | 30                | 0.0000 | -1.3641 | Down |
| BHGZD vs. AIA-M_mRNA_Seq | CD177             | 0.0098 | 2.0804  | Up   |
| BHGZD vs. AIA-M_mRNA_Seq | CD226             | 0.0000 | -1.3063 | Down |
| BHGZD vs. AIA-M_mRNA_Seq | CD34              | 0.0136 | -5.0562 | Down |
| BHGZD vs. AIA-M_mRNA_Seq | CD52              | 0.0003 | -1.7161 | Down |
| BHGZD vs. AIA-M_mRNA_Seq | CD79AL            | 0.0045 | 1.1442  | Up   |
| BHGZD vs. AIA-M_mRNA_Seq | CD84              | 0.0005 | -1.0392 | Down |
| BHGZD vs. AIA-M_mRNA_Seq | CD9               | 0.0000 | -1.2845 | Down |
| BHGZD vs. AIA-M_mRNA_Seq | CDC25B            | 0.0012 | -1.4613 | Down |
| BHGZD vs. AIA-M_mRNA_Seq | CDC42BPA          | 0.0001 | -1.4030 | Down |
| BHGZD vs. AIA-M_mRNA_Seq | CDCA2             | 0.0013 | 2.8039  | Up   |
| BHGZD vs. AIA-M_mRNA_Seq | CDCA3             | 0.0100 | -1.6918 | Down |
| BHGZD vs. AIA-M_mRNA_Seq | CDKL1             | 0.0090 | -1.4450 | Down |
| BHGZD vs. AIA-M_mRNA_Seq | CDKN3             | 0.0026 | -1.7457 | Down |
| BHGZD vs. AIA-M_mRNA_Seq | CDR2              | 0.0051 | -1.2937 | Down |
| BHGZD vs. AIA-M_mRNA_Seq | CDS1              | 0.0014 | 1.2314  | Up   |
| BHGZD vs. AIA-M_mRNA_Seq | CEACAM18          | 0.0386 | 1.4692  | Up   |
| BHGZD vs. AIA-M_mRNA_Seq | CELA1             | 0.0007 | -1.6140 | Down |
| BHGZD vs. AIA-M_mRNA_Seq | CENPB             | 0.0071 | -1.1725 | Down |
| BHGZD vs. AIA-M_mRNA_Seq | CENPT             | 0.0433 | -1.5497 | Down |
| BHGZD vs. AIA-M_mRNA_Seq | CENPW             | 0.0108 | -1.6547 | Down |
| BHGZD vs. AIA-M_mRNA_Seq | CEP104            | 0.0063 | -1.1266 | Down |
| BHGZD vs. AIA-M_mRNA_Seq | CEP295NL          | 0.0052 | 4.5164  | Up   |

---

|                          |          |        |         |      |
|--------------------------|----------|--------|---------|------|
| BHGZD vs. AIA-M_mRNA_Seq | CEP83    | 0.0065 | -1.1149 | Down |
| BHGZD vs. AIA-M_mRNA_Seq | CEP89    | 0.0137 | -1.1533 | Down |
| BHGZD vs. AIA-M_mRNA_Seq | CFAP57   | 0.0384 | -2.4903 | Down |
| BHGZD vs. AIA-M_mRNA_Seq | CGAS     | 0.0410 | -1.2327 | Down |
| BHGZD vs. AIA-M_mRNA_Seq | CGREF1   | 0.0308 | -6.5602 | Down |
| BHGZD vs. AIA-M_mRNA_Seq | CH25H    | 0.0283 | 3.8635  | Up   |
| BHGZD vs. AIA-M_mRNA_Seq | CHAC2    | 0.0426 | -1.0990 | Down |
| BHGZD vs. AIA-M_mRNA_Seq | CHCHD2   | 0.0033 | -1.1468 | Down |
| BHGZD vs. AIA-M_mRNA_Seq | CHCHD7   | 0.0224 | -1.1458 | Down |
| BHGZD vs. AIA-M_mRNA_Seq | CHMP4B   | 0.0028 | -1.3198 | Down |
| BHGZD vs. AIA-M_mRNA_Seq | CHMP4BL1 | 0.0008 | -1.4679 | Down |
| BHGZD vs. AIA-M_mRNA_Seq | CHN1     | 0.0053 | -1.3082 | Down |
| BHGZD vs. AIA-M_mRNA_Seq | CHRD1    | 0.0001 | -1.4986 | Down |
| BHGZD vs. AIA-M_mRNA_Seq | CHST2    | 0.0008 | -1.1119 | Down |
| BHGZD vs. AIA-M_mRNA_Seq | CHURC1   | 0.0007 | -1.4608 | Down |
| BHGZD vs. AIA-M_mRNA_Seq | CIB2     | 0.0423 | -3.6097 | Down |
| BHGZD vs. AIA-M_mRNA_Seq | CISH     | 0.0000 | -1.5474 | Down |
| BHGZD vs. AIA-M_mRNA_Seq | CKAP2L   | 0.0357 | -1.6157 | Down |
| BHGZD vs. AIA-M_mRNA_Seq | CLDN7    | 0.0405 | -5.9825 | Down |
| BHGZD vs. AIA-M_mRNA_Seq | CLEC1B   | 0.0001 | -1.3748 | Down |
| BHGZD vs. AIA-M_mRNA_Seq | CLEC4F   | 0.0006 | -1.3655 | Down |
| BHGZD vs. AIA-M_mRNA_Seq | CLIC4    | 0.0000 | -1.3496 | Down |
| BHGZD vs. AIA-M_mRNA_Seq | CLIP2    | 0.0001 | -1.1604 | Down |
| BHGZD vs. AIA-M_mRNA_Seq | CLNK     | 0.0257 | 1.3117  | Up   |
| BHGZD vs. AIA-M_mRNA_Seq | CLOCK    | 0.0000 | -1.5853 | Down |
| BHGZD vs. AIA-M_mRNA_Seq | CLSTN2   | 0.0301 | -3.9501 | Down |
| BHGZD vs. AIA-M_mRNA_Seq | CLU      | 0.0000 | -1.4820 | Down |

---

|                          |                   |        |         |      |
|--------------------------|-------------------|--------|---------|------|
| BHGZD vs. AIA-M_mRNA_Seq | CMAS              | 0.0082 | -1.0558 | Down |
| BHGZD vs. AIA-M_mRNA_Seq | CMC2              | 0.0003 | -1.5774 | Down |
| BHGZD vs. AIA-M_mRNA_Seq | CMPK1             | 0.0001 | -1.0229 | Down |
| BHGZD vs. AIA-M_mRNA_Seq | CMPK2             | 0.0100 | -1.1930 | Down |
| BHGZD vs. AIA-M_mRNA_Seq | CMTM4             | 0.0063 | -1.4590 | Down |
| BHGZD vs. AIA-M_mRNA_Seq | CNIH2             | 0.0018 | -1.2351 | Down |
| BHGZD vs. AIA-M_mRNA_Seq | CNPPD1            | 0.0072 | -1.0427 | Down |
| BHGZD vs. AIA-M_mRNA_Seq | CNST              | 0.0002 | -1.1812 | Down |
| BHGZD vs. AIA-M_mRNA_Seq | COL4A1            | 0.0051 | -2.1515 | Down |
| BHGZD vs. AIA-M_mRNA_Seq | COL4A4            | 0.0006 | -1.2211 | Down |
| BHGZD vs. AIA-M_mRNA_Seq | COX4I1            | 0.0012 | -1.4314 | Down |
| BHGZD vs. AIA-M_mRNA_Seq | COX6A1            | 0.0014 | -1.3820 | Down |
| BHGZD vs. AIA-M_mRNA_Seq | COX6B1            | 0.0040 | -1.2271 | Down |
| BHGZD vs. AIA-M_mRNA_Seq | COX7A2//COX7A2L2  | 0.0026 | -1.2957 | Down |
| BHGZD vs. AIA-M_mRNA_Seq | COX7A2L           | 0.0028 | -1.1900 | Down |
| BHGZD vs. AIA-M_mRNA_Seq | COX7B             | 0.0044 | -1.3038 | Down |
| BHGZD vs. AIA-M_mRNA_Seq | COX8A             | 0.0018 | -1.3801 | Down |
| BHGZD vs. AIA-M_mRNA_Seq | CPA1              | 0.0115 | -3.0935 | Down |
| BHGZD vs. AIA-M_mRNA_Seq | CPQ               | 0.0000 | -1.6821 | Down |
| BHGZD vs. AIA-M_mRNA_Seq | CRABP1            | 0.0081 | -1.9772 | Down |
|                          | CRABP2//LOC100911 |        |         |      |
| BHGZD vs. AIA-M_mRNA_Seq | 902               | 0.0101 | 3.8683  | Up   |
|                          | CRACR2B//LOC1009  |        |         |      |
| BHGZD vs. AIA-M_mRNA_Seq | 11692             | 0.0256 | -1.8030 | Down |
| BHGZD vs. AIA-M_mRNA_Seq | CREG1             | 0.0049 | -1.3873 | Down |
| BHGZD vs. AIA-M_mRNA_Seq | CRIM1             | 0.0009 | -1.1336 | Down |
| BHGZD vs. AIA-M_mRNA_Seq | CSDC2             | 0.0151 | -1.4032 | Down |

|                          |            |        |         |      |
|--------------------------|------------|--------|---------|------|
| BHGZD vs. AIA-M_mRNA_Seq | CSGALNACT1 | 0.0001 | -1.3017 | Down |
| BHGZD vs. AIA-M_mRNA_Seq | CST3       | 0.0001 | -1.3479 | Down |
| BHGZD vs. AIA-M_mRNA_Seq | CTBP1      | 0.0001 | -1.0837 | Down |
| BHGZD vs. AIA-M_mRNA_Seq | CTDSPL     | 0.0089 | -1.0297 | Down |
| BHGZD vs. AIA-M_mRNA_Seq | CTRB1      | 0.0001 | -1.8123 | Down |
| BHGZD vs. AIA-M_mRNA_Seq | CTSB       | 0.0057 | -1.2418 | Down |
| BHGZD vs. AIA-M_mRNA_Seq | CTSD       | 0.0048 | -1.1633 | Down |
| BHGZD vs. AIA-M_mRNA_Seq | CTTN       | 0.0000 | -1.9100 | Down |
| BHGZD vs. AIA-M_mRNA_Seq | CTTNBP2NL  | 0.0004 | -1.4626 | Down |
| BHGZD vs. AIA-M_mRNA_Seq | CUX1       | 0.0028 | -1.1724 | Down |
| BHGZD vs. AIA-M_mRNA_Seq | CXCL2      | 0.0001 | -1.2825 | Down |
| BHGZD vs. AIA-M_mRNA_Seq | CXXC4      | 0.0000 | -1.5581 | Down |
| BHGZD vs. AIA-M_mRNA_Seq | CYB5R4     | 0.0001 | -1.0035 | Down |
| BHGZD vs. AIA-M_mRNA_Seq | CYP27A1    | 0.0346 | -1.9802 | Down |
| BHGZD vs. AIA-M_mRNA_Seq | CYP2J4     | 0.0477 | -1.7076 | Down |
| BHGZD vs. AIA-M_mRNA_Seq | DACT1      | 0.0059 | -2.7562 | Down |
| BHGZD vs. AIA-M_mRNA_Seq | DAND5      | 0.0001 | -1.8524 | Down |
| BHGZD vs. AIA-M_mRNA_Seq | DAP        | 0.0083 | -1.1021 | Down |
| BHGZD vs. AIA-M_mRNA_Seq | DAPK2      | 0.0025 | -1.2747 | Down |
| BHGZD vs. AIA-M_mRNA_Seq | DAZL       | 0.0355 | -4.5690 | Down |
| BHGZD vs. AIA-M_mRNA_Seq | DCTN2      | 0.0017 | -1.3521 | Down |
| BHGZD vs. AIA-M_mRNA_Seq | DCTPP1     | 0.0043 | -1.8575 | Down |
| BHGZD vs. AIA-M_mRNA_Seq | DCUN1D1    | 0.0056 | -1.0872 | Down |
| BHGZD vs. AIA-M_mRNA_Seq | DDX25      | 0.0077 | 2.9352  | Up   |
| BHGZD vs. AIA-M_mRNA_Seq | DENND2C    | 0.0006 | -1.3200 | Down |
| BHGZD vs. AIA-M_mRNA_Seq | DHDH       | 0.0211 | 1.0557  | Up   |
| BHGZD vs. AIA-M_mRNA_Seq | DHRS11     | 0.0012 | -1.4918 | Down |

|                          |                    |        |         |      |
|--------------------------|--------------------|--------|---------|------|
| BHGZD vs. AIA-M_mRNA_Seq | DMTN               | 0.0043 | -1.2073 | Down |
| BHGZD vs. AIA-M_mRNA_Seq | DNAH1              | 0.0002 | -1.6980 | Down |
| BHGZD vs. AIA-M_mRNA_Seq | DNAH6              | 0.0438 | 2.4776  | Up   |
| BHGZD vs. AIA-M_mRNA_Seq | DNAJA4             | 0.0002 | -1.1152 | Down |
| BHGZD vs. AIA-M_mRNA_Seq | DNAJB12            | 0.0008 | -1.3841 | Down |
| BHGZD vs. AIA-M_mRNA_Seq | DNAJB2             | 0.0007 | -1.4800 | Down |
| BHGZD vs. AIA-M_mRNA_Seq | DNASE1L2           | 0.0083 | -5.5664 | Down |
| BHGZD vs. AIA-M_mRNA_Seq | DOCK4              | 0.0115 | 1.1826  | Up   |
| BHGZD vs. AIA-M_mRNA_Seq | DOK4               | 0.0079 | -1.2531 | Down |
| BHGZD vs. AIA-M_mRNA_Seq | DPF3               | 0.0034 | -1.6315 | Down |
| BHGZD vs. AIA-M_mRNA_Seq | DPH3               | 0.0056 | -1.0536 | Down |
| BHGZD vs. AIA-M_mRNA_Seq | DUSP8              | 0.0346 | -3.3416 | Down |
| BHGZD vs. AIA-M_mRNA_Seq | DYNLL1             | 0.0005 | -1.4503 | Down |
| BHGZD vs. AIA-M_mRNA_Seq | DYNLL2             | 0.0003 | -1.0204 | Down |
| BHGZD vs. AIA-M_mRNA_Seq | DYNLRB1            | 0.0035 | -1.2032 | Down |
| BHGZD vs. AIA-M_mRNA_Seq | E2F2               | 0.0026 | -1.2240 | Down |
| BHGZD vs. AIA-M_mRNA_Seq | ECE2               | 0.0000 | -7.0144 | Down |
| BHGZD vs. AIA-M_mRNA_Seq | ECM1               | 0.0049 | -1.0249 | Down |
| BHGZD vs. AIA-M_mRNA_Seq | EEF1D              | 0.0021 | -1.1956 | Down |
| BHGZD vs. AIA-M_mRNA_Seq | EEF1E1             | 0.0176 | -1.0218 | Down |
| BHGZD vs. AIA-M_mRNA_Seq | EGF//LOC100910178  | 0.0040 | 4.1399  | Up   |
| BHGZD vs. AIA-M_mRNA_Seq | EGLN3              | 0.0033 | -1.0173 | Down |
| BHGZD vs. AIA-M_mRNA_Seq | EHD2               | 0.0001 | -1.7746 | Down |
| BHGZD vs. AIA-M_mRNA_Seq | EIF1               | 0.0007 | -1.3649 | Down |
|                          | EIF3H//LOC10091111 |        |         |      |
| BHGZD vs. AIA-M_mRNA_Seq | 0//LOC108348062    | 0.0015 | -1.3678 | Down |
| BHGZD vs. AIA-M_mRNA_Seq | EIF4E2             | 0.0039 | -1.0733 | Down |

|                          |         |        |         |      |
|--------------------------|---------|--------|---------|------|
| BHGZD vs. AIA-M_mRNA_Seq | ELL2    | 0.0040 | -1.3275 | Down |
| BHGZD vs. AIA-M_mRNA_Seq | ELN     | 0.0005 | -6.1763 | Down |
| BHGZD vs. AIA-M_mRNA_Seq | ELOB    | 0.0008 | -1.5477 | Down |
| BHGZD vs. AIA-M_mRNA_Seq | EMB     | 0.0190 | -1.0280 | Down |
| BHGZD vs. AIA-M_mRNA_Seq | ENY2    | 0.0030 | -1.1007 | Down |
| BHGZD vs. AIA-M_mRNA_Seq | EPB41   | 0.0190 | -1.0083 | Down |
| BHGZD vs. AIA-M_mRNA_Seq | EPB42   | 0.0072 | -1.3664 | Down |
| BHGZD vs. AIA-M_mRNA_Seq | EPDR1   | 0.0014 | -1.4755 | Down |
| BHGZD vs. AIA-M_mRNA_Seq | EPN1    | 0.0008 | -1.4475 | Down |
| BHGZD vs. AIA-M_mRNA_Seq | EPOR    | 0.0013 | -1.6470 | Down |
| BHGZD vs. AIA-M_mRNA_Seq | ERFE    | 0.0101 | -2.7202 | Down |
| BHGZD vs. AIA-M_mRNA_Seq | ERI2    | 0.0337 | 1.0330  | Up   |
| BHGZD vs. AIA-M_mRNA_Seq | ERMAP   | 0.0019 | -1.6329 | Down |
| BHGZD vs. AIA-M_mRNA_Seq | ESAM    | 0.0000 | -1.6122 | Down |
| BHGZD vs. AIA-M_mRNA_Seq | ESPNL   | 0.0197 | -3.5269 | Down |
| BHGZD vs. AIA-M_mRNA_Seq | EXOSC5  | 0.0011 | -1.3540 | Down |
| BHGZD vs. AIA-M_mRNA_Seq | F11R    | 0.0000 | -1.5369 | Down |
| BHGZD vs. AIA-M_mRNA_Seq | F13A1   | 0.0000 | -1.3791 | Down |
| BHGZD vs. AIA-M_mRNA_Seq | F2RL2   | 0.0002 | -1.0784 | Down |
| BHGZD vs. AIA-M_mRNA_Seq | F2RL3   | 0.0000 | -1.5841 | Down |
| BHGZD vs. AIA-M_mRNA_Seq | F5      | 0.0000 | -1.2335 | Down |
| BHGZD vs. AIA-M_mRNA_Seq | FADS1   | 0.0049 | -1.1669 | Down |
| BHGZD vs. AIA-M_mRNA_Seq | FADS2   | 0.0048 | -1.6028 | Down |
| BHGZD vs. AIA-M_mRNA_Seq | FAM104A | 0.0009 | -1.5021 | Down |
| BHGZD vs. AIA-M_mRNA_Seq | FAM104B | 0.0062 | -1.1555 | Down |
| BHGZD vs. AIA-M_mRNA_Seq | FAM110B | 0.0329 | -2.5418 | Down |
| BHGZD vs. AIA-M_mRNA_Seq | FAM111A | 0.0027 | -1.3945 | Down |



---

|                          |                |        |         |      |
|--------------------------|----------------|--------|---------|------|
| BHGZD vs. AIA-M_mRNA_Seq | FAM117A        | 0.0007 | -1.4519 | Down |
| BHGZD vs. AIA-M_mRNA_Seq | FAM167A        | 0.0403 | 3.7237  | Up   |
| BHGZD vs. AIA-M_mRNA_Seq | FAM184A        | 0.0007 | -1.5781 | Down |
| BHGZD vs. AIA-M_mRNA_Seq | FAM189A2       | 0.0041 | -1.9042 | Down |
| BHGZD vs. AIA-M_mRNA_Seq | FAM214B        | 0.0067 | -1.1506 | Down |
| BHGZD vs. AIA-M_mRNA_Seq | FAM220A        | 0.0017 | -1.3480 | Down |
| BHGZD vs. AIA-M_mRNA_Seq | FAM228A        | 0.0078 | -1.7052 | Down |
| BHGZD vs. AIA-M_mRNA_Seq | FAM229A        | 0.0392 | -1.1223 | Down |
| BHGZD vs. AIA-M_mRNA_Seq | FAM57A         | 0.0001 | -1.1605 | Down |
| BHGZD vs. AIA-M_mRNA_Seq | FAM57B         | 0.0027 | -1.7906 | Down |
| BHGZD vs. AIA-M_mRNA_Seq | FAM89B         | 0.0002 | -1.8017 | Down |
| BHGZD vs. AIA-M_mRNA_Seq | FAM92A         | 0.0047 | -1.3112 | Down |
| BHGZD vs. AIA-M_mRNA_Seq | FARP2          | 0.0179 | -1.1698 | Down |
| BHGZD vs. AIA-M_mRNA_Seq | FAU//LOC687780 | 0.0005 | -1.6260 | Down |
| BHGZD vs. AIA-M_mRNA_Seq | FBLL1          | 0.0293 | 3.8346  | Up   |
| BHGZD vs. AIA-M_mRNA_Seq | FBLN5          | 0.0352 | -3.6841 | Down |
| BHGZD vs. AIA-M_mRNA_Seq | FBXO7          | 0.0092 | -1.0531 | Down |
| BHGZD vs. AIA-M_mRNA_Seq | FCRL1          | 0.0039 | 1.0027  | Up   |
| BHGZD vs. AIA-M_mRNA_Seq | FECH           | 0.0039 | -1.4115 | Down |
| BHGZD vs. AIA-M_mRNA_Seq | FGD6           | 0.0256 | 1.6158  | Up   |
| BHGZD vs. AIA-M_mRNA_Seq | FHL1           | 0.0000 | -1.4704 | Down |
| BHGZD vs. AIA-M_mRNA_Seq | FMO3           | 0.0223 | -6.4066 | Down |
| BHGZD vs. AIA-M_mRNA_Seq | FN3K           | 0.0053 | -1.2664 | Down |
| BHGZD vs. AIA-M_mRNA_Seq | FN3KRP         | 0.0057 | -1.4223 | Down |
| BHGZD vs. AIA-M_mRNA_Seq | FNTB           | 0.0020 | -1.0347 | Down |
| BHGZD vs. AIA-M_mRNA_Seq | FOXO4          | 0.0063 | -1.1047 | Down |
| BHGZD vs. AIA-M_mRNA_Seq | FPR3           | 0.0000 | 1.0909  | Up   |

---

---

| FTH1//LOC679217//L       |                    |        |         |      |
|--------------------------|--------------------|--------|---------|------|
| BHGZD vs. AIA-M_mRNA_Seq | OC689130           | 0.0005 | -1.3350 | Down |
| BHGZD vs. AIA-M_mRNA_Seq | FTL1               | 0.0002 | -1.6822 | Down |
| BHGZD vs. AIA-M_mRNA_Seq | FXN                | 0.0026 | -1.3956 | Down |
| BHGZD vs. AIA-M_mRNA_Seq | FZD3               | 0.0085 | -1.3375 | Down |
| BHGZD vs. AIA-M_mRNA_Seq | FZR1               | 0.0033 | -1.3592 | Down |
| BHGZD vs. AIA-M_mRNA_Seq | G6PC3              | 0.0002 | -1.1740 | Down |
| BHGZD vs. AIA-M_mRNA_Seq | GABARAP            | 0.0043 | -1.1779 | Down |
| GABARAPL2//LOC10         |                    |        |         |      |
| BHGZD vs. AIA-M_mRNA_Seq | 0359937            | 0.0018 | -1.4343 | Down |
| BHGZD vs. AIA-M_mRNA_Seq | GADD45G            | 0.0309 | -1.1012 | Down |
| BHGZD vs. AIA-M_mRNA_Seq | GALNT10            | 0.0042 | -1.1517 | Down |
| BHGZD vs. AIA-M_mRNA_Seq | GAS2L1             | 0.0001 | -1.4515 | Down |
| BHGZD vs. AIA-M_mRNA_Seq | GAS6               | 0.0265 | -1.2679 | Down |
| GATA1//LOC1083480        |                    |        |         |      |
| BHGZD vs. AIA-M_mRNA_Seq | 91                 | 0.0075 | -1.1711 | Down |
| GATA1//NEWGENE_          |                    |        |         |      |
| BHGZD vs. AIA-M_mRNA_Seq | 2663//LOC108348091 | 0.0015 | -1.5923 | Down |
| BHGZD vs. AIA-M_mRNA_Seq | GATAD1             | 0.0001 | -1.1379 | Down |
| BHGZD vs. AIA-M_mRNA_Seq | GCH1               | 0.0071 | -1.1798 | Down |
| BHGZD vs. AIA-M_mRNA_Seq | GCLM               | 0.0022 | -1.4144 | Down |
| BHGZD vs. AIA-M_mRNA_Seq | GDPD2              | 0.0003 | -1.3230 | Down |
| BHGZD vs. AIA-M_mRNA_Seq | GFI1B              | 0.0003 | -1.4703 | Down |
| BHGZD vs. AIA-M_mRNA_Seq | GLO1               | 0.0058 | -1.0078 | Down |
| BHGZD vs. AIA-M_mRNA_Seq | GLOD5              | 0.0021 | -1.3246 | Down |
| BHGZD vs. AIA-M_mRNA_Seq | GLRX5              | 0.0011 | -1.5008 | Down |
| BHGZD vs. AIA-M_mRNA_Seq | GLS2               | 0.0452 | -5.1076 | Down |

---

|                          |                    |        |         |      |
|--------------------------|--------------------|--------|---------|------|
| BHGZD vs. AIA-M_mRNA_Seq | GLTP               | 0.0035 | -1.2329 | Down |
| BHGZD vs. AIA-M_mRNA_Seq | GLUL               | 0.0007 | -1.5261 | Down |
| BHGZD vs. AIA-M_mRNA_Seq | GM5471             | 0.0013 | -1.3928 | Down |
| BHGZD vs. AIA-M_mRNA_Seq | GMPR               | 0.0000 | -1.4888 | Down |
| BHGZD vs. AIA-M_mRNA_Seq | GNA12              | 0.0001 | -1.3569 | Down |
| BHGZD vs. AIA-M_mRNA_Seq | GNAS               | 0.0032 | -1.3305 | Down |
| BHGZD vs. AIA-M_mRNA_Seq | GNAZ               | 0.0000 | -1.4201 | Down |
| BHGZD vs. AIA-M_mRNA_Seq | GNG11              | 0.0002 | -1.4213 | Down |
| BHGZD vs. AIA-M_mRNA_Seq | GNG12              | 0.0148 | -1.0619 | Down |
| BHGZD vs. AIA-M_mRNA_Seq | GP1BA              | 0.0001 | -1.3329 | Down |
| BHGZD vs. AIA-M_mRNA_Seq | GP1BB              | 0.0431 | -1.5758 | Down |
|                          | GP5//LOC100911551/ |        |         |      |
| BHGZD vs. AIA-M_mRNA_Seq | /NEWGENE_2724      | 0.0000 | -1.5275 | Down |
|                          | GP5//NEWGENE_272   |        |         |      |
| BHGZD vs. AIA-M_mRNA_Seq | 4                  | 0.0000 | -1.5289 | Down |
| BHGZD vs. AIA-M_mRNA_Seq | GP6                | 0.0000 | -1.4377 | Down |
| BHGZD vs. AIA-M_mRNA_Seq | GP9                | 0.0002 | -1.4034 | Down |
| BHGZD vs. AIA-M_mRNA_Seq | GPT                | 0.0426 | -1.4390 | Down |
| BHGZD vs. AIA-M_mRNA_Seq | GPX1               | 0.0178 | -1.1503 | Down |
| BHGZD vs. AIA-M_mRNA_Seq | GPX3               | 0.0001 | -1.5102 | Down |
| BHGZD vs. AIA-M_mRNA_Seq | GPX4               | 0.0022 | -1.4112 | Down |
| BHGZD vs. AIA-M_mRNA_Seq | GRB10              | 0.0028 | -1.3209 | Down |
| BHGZD vs. AIA-M_mRNA_Seq | GRINA              | 0.0015 | -1.3563 | Down |
| BHGZD vs. AIA-M_mRNA_Seq | GRM5               | 0.0141 | -4.2790 | Down |
| BHGZD vs. AIA-M_mRNA_Seq | GSN                | 0.0000 | -1.3103 | Down |
|                          | GSTA1//LOC1083480  |        |         |      |
| BHGZD vs. AIA-M_mRNA_Seq | 61                 | 0.0008 | -1.3929 | Down |

|                          |                                                              |        |         |      |
|--------------------------|--------------------------------------------------------------|--------|---------|------|
| BHGZD vs. AIA-M_mRNA_Seq | GSTA4                                                        | 0.0013 | -1.4648 | Down |
| BHGZD vs. AIA-M_mRNA_Seq | GSTM5//GSTM3                                                 | 0.0054 | -1.5083 | Down |
| BHGZD vs. AIA-M_mRNA_Seq | GSTP1                                                        | 0.0002 | -1.2988 | Down |
| BHGZD vs. AIA-M_mRNA_Seq | GSTT3                                                        | 0.0026 | -1.6639 | Down |
| BHGZD vs. AIA-M_mRNA_Seq | GUCY1A1                                                      | 0.0000 | -1.4963 | Down |
| BHGZD vs. AIA-M_mRNA_Seq | GUCY1B1                                                      | 0.0001 | -1.3631 | Down |
| BHGZD vs. AIA-M_mRNA_Seq | H2AFJ                                                        | 0.0009 | -1.3426 | Down |
| BHGZD vs. AIA-M_mRNA_Seq | HAGH                                                         | 0.0011 | -1.5646 | Down |
| BHGZD vs. AIA-M_mRNA_Seq | HAUS4                                                        | 0.0065 | -1.3259 | Down |
| BHGZD vs. AIA-M_mRNA_Seq | HBA1                                                         | 0.0001 | -1.7903 | Down |
| BHGZD vs. AIA-M_mRNA_Seq | HBA-A1                                                       | 0.0002 | -1.7830 | Down |
| BHGZD vs. AIA-M_mRNA_Seq | HBA-A2                                                       | 0.0001 | -1.7705 | Down |
| BHGZD vs. AIA-M_mRNA_Seq | HBB                                                          | 0.0002 | -1.8271 | Down |
| BHGZD vs. AIA-M_mRNA_Seq | HBB-B1//LOC689064                                            | 0.0001 | -1.7855 | Down |
| BHGZD vs. AIA-M_mRNA_Seq | HBE1                                                         | 0.0240 | -1.2836 | Down |
| BHGZD vs. AIA-M_mRNA_Seq | HBQ1B                                                        | 0.0032 | -1.4137 | Down |
| BHGZD vs. AIA-M_mRNA_Seq | HCFC1R1                                                      | 0.0012 | -1.3137 | Down |
| BHGZD vs. AIA-M_mRNA_Seq | HDAC9                                                        | 0.0009 | 1.0010  | Up   |
| BHGZD vs. AIA-M_mRNA_Seq | HDHD3                                                        | 0.0097 | 4.4040  | Up   |
| BHGZD vs. AIA-M_mRNA_Seq | HEMGN                                                        | 0.0148 | -1.2433 | Down |
| BHGZD vs. AIA-M_mRNA_Seq | HEXA                                                         | 0.0045 | -1.1952 | Down |
| BHGZD vs. AIA-M_mRNA_Seq | HINT1                                                        | 0.0017 | -1.4041 | Down |
| BHGZD vs. AIA-M_mRNA_Seq | HIST1H1D                                                     | 0.0009 | -1.2821 | Down |
|                          | HIST1H2AC//HIST1H<br>2AN//HIST1H2AI//LO<br>C684773//LOC10036 |        |         |      |
| BHGZD vs. AIA-M_mRNA_Seq | 0754                                                         | 0.0013 | -1.4459 | Down |

|                          |                     |        |         |      |
|--------------------------|---------------------|--------|---------|------|
| BHGZD vs. AIA-M_mRNA_Seq | HIST1H2AF           | 0.0018 | -1.2342 | Down |
|                          | HIST1H2AH//LOC103   |        |         |      |
| BHGZD vs. AIA-M_mRNA_Seq | 690190              | 0.0003 | -1.2617 | Down |
| BHGZD vs. AIA-M_mRNA_Seq | HIST1H2AK           | 0.0277 | -1.5185 | Down |
| BHGZD vs. AIA-M_mRNA_Seq | HIST1H2AN           | 0.0240 | -1.4373 | Down |
|                          | HIST1H2AO//HIST2H   |        |         |      |
|                          | 4A//HIST1H4A//LOC1  |        |         |      |
| BHGZD vs. AIA-M_mRNA_Seq | 00912564            | 0.0040 | -1.9358 | Down |
|                          | HIST1H2AO//HIST2H   |        |         |      |
|                          | 4A//HIST4H4//LOC10  |        |         |      |
| BHGZD vs. AIA-M_mRNA_Seq | 0912564             | 0.0169 | -1.7315 | Down |
|                          | HIST1H2AO//HIST2H   |        |         |      |
| BHGZD vs. AIA-M_mRNA_Seq | 4A//LOC100912564    | 0.0001 | -1.4359 | Down |
|                          | HIST1H2AO//HIST2H   |        |         |      |
|                          | 4A//LOC100912564//L |        |         |      |
| BHGZD vs. AIA-M_mRNA_Seq | OC102548682         | 0.0009 | -1.5703 | Down |
|                          | HIST1H2AO//RGD15    |        |         |      |
|                          | 62378//HIST2H4A//L  |        |         |      |
| BHGZD vs. AIA-M_mRNA_Seq | OC100912564         | 0.0081 | -1.2207 | Down |
| BHGZD vs. AIA-M_mRNA_Seq | HIST1H2BD           | 0.0080 | -1.5297 | Down |
|                          | HIST1H2BH//HIST1H   |        |         |      |
|                          | 2BC//LOC684797//LO  |        |         |      |
|                          | C100364835//LOC10   |        |         |      |
|                          | 0365043//LOC100910  |        |         |      |
| BHGZD vs. AIA-M_mRNA_Seq | 200                 | 0.0001 | -1.5220 | Down |
| BHGZD vs. AIA-M_mRNA_Seq | HIST1H2BK           | 0.0429 | -1.6367 | Down |
| BHGZD vs. AIA-M_mRNA_Seq | HIST1H2BO           | 0.0019 | -1.6254 | Down |

---

|                          |                    |        |         |      |
|--------------------------|--------------------|--------|---------|------|
|                          | HIST1H3A//LOC6804  |        |         |      |
| BHGZD vs. AIA-M_mRNA_Seq | 98//LOC682330      | 0.0014 | -1.6275 | Down |
|                          | HIST1H4B//HIST1H2  |        |         |      |
|                          | AO//HIST2H4A//LOC1 |        |         |      |
| BHGZD vs. AIA-M_mRNA_Seq | 00912564           | 0.0008 | -1.5210 | Down |
|                          | HIST2H2AA3//HIST2  |        |         |      |
| BHGZD vs. AIA-M_mRNA_Seq | H2AA2              | 0.0027 | -1.0934 | Down |
| BHGZD vs. AIA-M_mRNA_Seq | HIST2H2AC          | 0.0006 | -2.1036 | Down |
|                          | HIST2H4//HIST1H2A  |        |         |      |
|                          | O//HIST2H4A//LOC10 |        |         |      |
| BHGZD vs. AIA-M_mRNA_Seq | 0912564            | 0.0020 | -2.1042 | Down |
| BHGZD vs. AIA-M_mRNA_Seq | HIST3H2BA          | 0.0009 | -1.5433 | Down |
| BHGZD vs. AIA-M_mRNA_Seq | HIST3H2BB          | 0.0060 | -1.4021 | Down |
| BHGZD vs. AIA-M_mRNA_Seq | HIVEP3             | 0.0267 | 1.0399  | Up   |
| BHGZD vs. AIA-M_mRNA_Seq | HMBS               | 0.0012 | -1.4293 | Down |
| BHGZD vs. AIA-M_mRNA_Seq | HMG20B             | 0.0065 | -1.0252 | Down |
| BHGZD vs. AIA-M_mRNA_Seq | HNF4A              | 0.0066 | 3.9182  | Up   |
| BHGZD vs. AIA-M_mRNA_Seq | HPSE               | 0.0000 | -1.3065 | Down |
| BHGZD vs. AIA-M_mRNA_Seq | HSCB               | 0.0040 | -1.3514 | Down |
| BHGZD vs. AIA-M_mRNA_Seq | HSD17B14           | 0.0006 | -1.5480 | Down |
| BHGZD vs. AIA-M_mRNA_Seq | HYAL3              | 0.0010 | -1.1748 | Down |
| BHGZD vs. AIA-M_mRNA_Seq | HYI                | 0.0024 | -1.4680 | Down |
| BHGZD vs. AIA-M_mRNA_Seq | HYPK               | 0.0020 | -1.3888 | Down |
| BHGZD vs. AIA-M_mRNA_Seq | ICAM4              | 0.0046 | -1.7062 | Down |
| BHGZD vs. AIA-M_mRNA_Seq | IFRD2              | 0.0047 | -1.2586 | Down |
| BHGZD vs. AIA-M_mRNA_Seq | IFT22              | 0.0003 | 4.1572  | Up   |
| BHGZD vs. AIA-M_mRNA_Seq | IFT27              | 0.0010 | -1.6092 | Down |

---

|                          |                    |        |         |      |
|--------------------------|--------------------|--------|---------|------|
| BHGZD vs. AIA-M_mRNA_Seq | IFT46              | 0.0116 | -1.0311 | Down |
| BHGZD vs. AIA-M_mRNA_Seq | IFT57              | 0.0044 | -1.2747 | Down |
| BHGZD vs. AIA-M_mRNA_Seq | IGF2               | 0.0432 | 2.5178  | Up   |
| BHGZD vs. AIA-M_mRNA_Seq | IGSF10             | 0.0001 | -1.4300 | Down |
| BHGZD vs. AIA-M_mRNA_Seq | ILK                | 0.0001 | -1.1246 | Down |
| BHGZD vs. AIA-M_mRNA_Seq | INO80C             | 0.0023 | -1.1134 | Down |
| BHGZD vs. AIA-M_mRNA_Seq | INPP5A             | 0.0000 | -1.1716 | Down |
| BHGZD vs. AIA-M_mRNA_Seq | ISCA1              | 0.0006 | -1.5907 | Down |
| BHGZD vs. AIA-M_mRNA_Seq | ISCA2              | 0.0064 | -1.2692 | Down |
| BHGZD vs. AIA-M_mRNA_Seq | ISCU               | 0.0025 | -1.4229 | Down |
| BHGZD vs. AIA-M_mRNA_Seq | ISG20              | 0.0012 | -1.5247 | Down |
| BHGZD vs. AIA-M_mRNA_Seq | ITGA11             | 0.0002 | -1.4992 | Down |
| BHGZD vs. AIA-M_mRNA_Seq | ITGA2B             | 0.0000 | -1.5017 | Down |
| BHGZD vs. AIA-M_mRNA_Seq | ITGA6              | 0.0000 | -1.4334 | Down |
| BHGZD vs. AIA-M_mRNA_Seq | ITGB3              | 0.0000 | -1.3277 | Down |
| BHGZD vs. AIA-M_mRNA_Seq | ITM2B              | 0.0021 | -1.0853 | Down |
| BHGZD vs. AIA-M_mRNA_Seq | ITSN1              | 0.0294 | -1.1643 | Down |
| BHGZD vs. AIA-M_mRNA_Seq | JAZF1              | 0.0002 | -1.3709 | Down |
| BHGZD vs. AIA-M_mRNA_Seq | KALRN              | 0.0015 | -1.7831 | Down |
|                          | KATNAL1//LOC10091  |        |         |      |
| BHGZD vs. AIA-M_mRNA_Seq | 0196//LOC103690050 | 0.0069 | -1.2866 | Down |
| BHGZD vs. AIA-M_mRNA_Seq | KCNAB1             | 0.0000 | -1.3601 | Down |
| BHGZD vs. AIA-M_mRNA_Seq | KCNS3              | 0.0003 | -1.4733 | Down |
| BHGZD vs. AIA-M_mRNA_Seq | KDR                | 0.0005 | -2.0126 | Down |
| BHGZD vs. AIA-M_mRNA_Seq | KEL                | 0.0020 | -1.5788 | Down |
| BHGZD vs. AIA-M_mRNA_Seq | KIF18B             | 0.0155 | -1.5961 | Down |
| BHGZD vs. AIA-M_mRNA_Seq | KIF21A             | 0.0084 | -1.3138 | Down |

|                          |                   |        |         |      |
|--------------------------|-------------------|--------|---------|------|
| BHGZD vs. AIA-M_mRNA_Seq | KIF2A             | 0.0000 | -1.1164 | Down |
| BHGZD vs. AIA-M_mRNA_Seq | KIF4A             | 0.0080 | -1.5340 | Down |
| BHGZD vs. AIA-M_mRNA_Seq | KLF1              | 0.0020 | -1.4512 | Down |
| BHGZD vs. AIA-M_mRNA_Seq | KLHL13            | 0.0009 | -2.3771 | Down |
| BHGZD vs. AIA-M_mRNA_Seq | KLHL42            | 0.0080 | -1.0737 | Down |
| BHGZD vs. AIA-M_mRNA_Seq | KLRA22            | 0.0175 | 1.6770  | Up   |
|                          | KNG2//KNG2L1//KNG |        |         |      |
| BHGZD vs. AIA-M_mRNA_Seq | 1                 | 0.0152 | -4.9917 | Down |
| BHGZD vs. AIA-M_mRNA_Seq | KNSTRN            | 0.0254 | -1.1195 | Down |
| BHGZD vs. AIA-M_mRNA_Seq | KRT71             | 0.0056 | -1.3524 | Down |
| BHGZD vs. AIA-M_mRNA_Seq | LACC1             | 0.0242 | 1.0089  | Up   |
| BHGZD vs. AIA-M_mRNA_Seq | LANCL3            | 0.0302 | -1.9667 | Down |
| BHGZD vs. AIA-M_mRNA_Seq | LARGE1            | 0.0001 | -1.4699 | Down |
| BHGZD vs. AIA-M_mRNA_Seq | LCORL             | 0.0396 | 1.4755  | Up   |
| BHGZD vs. AIA-M_mRNA_Seq | LEFTY2            | 0.0426 | 4.3278  | Up   |
| BHGZD vs. AIA-M_mRNA_Seq | LEKR1             | 0.0126 | 2.1711  | Up   |
| BHGZD vs. AIA-M_mRNA_Seq | LGALS2            | 0.0046 | -1.1216 | Down |
| BHGZD vs. AIA-M_mRNA_Seq | LGALS5            | 0.0021 | -1.4455 | Down |
| BHGZD vs. AIA-M_mRNA_Seq | LGALSL            | 0.0000 | -1.4054 | Down |
| BHGZD vs. AIA-M_mRNA_Seq | LHFPL6            | 0.0290 | -1.2276 | Down |
| BHGZD vs. AIA-M_mRNA_Seq | LIMS1             | 0.0001 | -1.0388 | Down |
| BHGZD vs. AIA-M_mRNA_Seq | LIPG              | 0.0134 | 1.3060  | Up   |
| BHGZD vs. AIA-M_mRNA_Seq | LMLN2             | 0.0242 | 3.9893  | Up   |
| BHGZD vs. AIA-M_mRNA_Seq | LMNA              | 0.0006 | -1.3151 | Down |
| BHGZD vs. AIA-M_mRNA_Seq | LOC100134871      | 0.0004 | -1.6823 | Down |
| BHGZD vs. AIA-M_mRNA_Seq | LOC100359505      | 0.0009 | -1.4242 | Down |
| BHGZD vs. AIA-M_mRNA_Seq | LOC100359668      | 0.0018 | -1.4674 | Down |



---

|                          |                    |        |         |      |
|--------------------------|--------------------|--------|---------|------|
|                          | LOC100359922//LOC  |        |         |      |
|                          | 100360491//LOC1003 |        |         |      |
|                          | 61259//LOC10036240 |        |         |      |
| BHGZD vs. AIA-M_mRNA_Seq | 0                  | 0.0001 | -1.3456 | Down |
| BHGZD vs. AIA-M_mRNA_Seq | LOC100359951       | 0.0016 | -1.3311 | Down |
|                          | LOC100359951//LOC  |        |         |      |
|                          | 100362149//LOC1003 |        |         |      |
| BHGZD vs. AIA-M_mRNA_Seq | 62684              | 0.0028 | -1.3161 | Down |
| BHGZD vs. AIA-M_mRNA_Seq | LOC100360087       | 0.0005 | -1.6050 | Down |
| BHGZD vs. AIA-M_mRNA_Seq | LOC100360491       | 0.0003 | -1.4071 | Down |
| BHGZD vs. AIA-M_mRNA_Seq | LOC100360573       | 0.0014 | -1.5465 | Down |
| BHGZD vs. AIA-M_mRNA_Seq | LOC100360781       | 0.0013 | -1.4733 | Down |
| BHGZD vs. AIA-M_mRNA_Seq | LOC100360791       | 0.0003 | -1.6598 | Down |
| BHGZD vs. AIA-M_mRNA_Seq | LOC100361061       | 0.0015 | -1.2138 | Down |
|                          | LOC100361180//LOC  |        |         |      |
|                          | 100362366//LOC1003 |        |         |      |
| BHGZD vs. AIA-M_mRNA_Seq | 65810              | 0.0045 | -1.1100 | Down |
| BHGZD vs. AIA-M_mRNA_Seq | LOC100361259       | 0.0040 | -1.3064 | Down |
| BHGZD vs. AIA-M_mRNA_Seq | LOC100361756       | 0.0046 | -1.5654 | Down |
| BHGZD vs. AIA-M_mRNA_Seq | LOC100361933       | 0.0042 | -1.5045 | Down |
| BHGZD vs. AIA-M_mRNA_Seq | LOC100362027       | 0.0039 | -1.1055 | Down |
| BHGZD vs. AIA-M_mRNA_Seq | LOC100362339       | 0.0005 | -1.5781 | Down |
| BHGZD vs. AIA-M_mRNA_Seq | LOC100362384       | 0.0003 | -1.6340 | Down |
| BHGZD vs. AIA-M_mRNA_Seq | LOC100362400       | 0.0005 | -1.2584 | Down |
| BHGZD vs. AIA-M_mRNA_Seq | LOC100362583       | 0.0021 | -1.1921 | Down |
| BHGZD vs. AIA-M_mRNA_Seq | LOC100362684       | 0.0016 | -1.4161 | Down |
| BHGZD vs. AIA-M_mRNA_Seq | LOC100362751       | 0.0027 | -1.4120 | Down |

---

---

|                          |              |        |         |      |
|--------------------------|--------------|--------|---------|------|
| BHGZD vs. AIA-M_mRNA_Seq | LOC100362830 | 0.0012 | -1.2188 | Down |
| BHGZD vs. AIA-M_mRNA_Seq | LOC100363452 | 0.0016 | -1.2069 | Down |
| BHGZD vs. AIA-M_mRNA_Seq | LOC100363469 | 0.0027 | -1.2715 | Down |
| BHGZD vs. AIA-M_mRNA_Seq | LOC100363537 | 0.0161 | -1.6731 | Down |
| BHGZD vs. AIA-M_mRNA_Seq | LOC100364116 | 0.0154 | -1.0954 | Down |
| BHGZD vs. AIA-M_mRNA_Seq | LOC100365450 | 0.0213 | -4.7931 | Down |
| BHGZD vs. AIA-M_mRNA_Seq | LOC100365839 | 0.0014 | -1.2746 | Down |
| BHGZD vs. AIA-M_mRNA_Seq | LOC100909726 | 0.0046 | -1.1102 | Down |
| BHGZD vs. AIA-M_mRNA_Seq | LOC100909857 | 0.0045 | -5.5950 | Down |
| BHGZD vs. AIA-M_mRNA_Seq | LOC100909878 | 0.0072 | -1.1188 | Down |
| BHGZD vs. AIA-M_mRNA_Seq | LOC100909912 | 0.0020 | -1.3189 | Down |
| BHGZD vs. AIA-M_mRNA_Seq | LOC100910650 | 0.0001 | -1.3841 | Down |
| BHGZD vs. AIA-M_mRNA_Seq | LOC100910978 | 0.0351 | -2.8138 | Down |
| BHGZD vs. AIA-M_mRNA_Seq | LOC100911130 | 0.0003 | -1.7290 | Down |
| BHGZD vs. AIA-M_mRNA_Seq | LOC100911371 | 0.0032 | -1.0574 | Down |
| BHGZD vs. AIA-M_mRNA_Seq | LOC100911516 | 0.0016 | -1.1967 | Down |
| BHGZD vs. AIA-M_mRNA_Seq | LOC100911575 | 0.0432 | -1.4293 | Down |
| BHGZD vs. AIA-M_mRNA_Seq | LOC100911674 | 0.0076 | -1.2292 | Down |
| BHGZD vs. AIA-M_mRNA_Seq | LOC100911692 | 0.0059 | -1.9962 | Down |
| BHGZD vs. AIA-M_mRNA_Seq | LOC100912034 | 0.0001 | -1.4206 | Down |
| BHGZD vs. AIA-M_mRNA_Seq | LOC100912228 | 0.0003 | -1.4317 | Down |
| BHGZD vs. AIA-M_mRNA_Seq | LOC100912502 | 0.0020 | -1.5997 | Down |
| BHGZD vs. AIA-M_mRNA_Seq | LOC102549061 | 0.0002 | -1.8583 | Down |
| BHGZD vs. AIA-M_mRNA_Seq | LOC102550036 | 0.0259 | -1.0947 | Down |
| BHGZD vs. AIA-M_mRNA_Seq | LOC102555453 | 0.0005 | -1.3503 | Down |
| BHGZD vs. AIA-M_mRNA_Seq | LOC102556051 | 0.0028 | -1.4675 | Down |
| BHGZD vs. AIA-M_mRNA_Seq | LOC102556092 | 0.0000 | -1.5513 | Down |

---

|                          |                                         |        |         |      |
|--------------------------|-----------------------------------------|--------|---------|------|
| BHGZD vs. AIA-M_mRNA_Seq | LOC102556337                            | 0.0006 | -1.4855 | Down |
| BHGZD vs. AIA-M_mRNA_Seq | LOC103689947                            | 0.0110 | -1.0580 | Down |
| BHGZD vs. AIA-M_mRNA_Seq | LOC103690002                            | 0.0008 | -1.3466 | Down |
| BHGZD vs. AIA-M_mRNA_Seq | LOC103690015                            | 0.0049 | -1.4168 | Down |
| BHGZD vs. AIA-M_mRNA_Seq | LOC103690020                            | 0.0094 | -1.2767 | Down |
| BHGZD vs. AIA-M_mRNA_Seq | LOC103690068                            | 0.0333 | -2.2693 | Down |
|                          | LOC103690821//LOC<br>103692785//LOC1036 |        |         |      |
| BHGZD vs. AIA-M_mRNA_Seq | 94404                                   | 0.0006 | -1.4476 | Down |
|                          | LOC103690821//LOC<br>103692831//LOC1036 |        |         |      |
| BHGZD vs. AIA-M_mRNA_Seq | 94404                                   | 0.0078 | -1.3078 | Down |
|                          | LOC103690821//LOC<br>103693375//LOC1036 |        |         |      |
| BHGZD vs. AIA-M_mRNA_Seq | 94404                                   | 0.0120 | -1.2524 | Down |
|                          | LOC103690821//LOC<br>103694169//LOC1036 |        |         |      |
| BHGZD vs. AIA-M_mRNA_Seq | 94404                                   | 0.0003 | -1.4874 | Down |
|                          | LOC103690821//LOC                       |        |         |      |
| BHGZD vs. AIA-M_mRNA_Seq | 103694404                               | 0.0135 | -1.2256 | Down |
| BHGZD vs. AIA-M_mRNA_Seq | LOC103692169                            | 0.0005 | -1.5489 | Down |
| BHGZD vs. AIA-M_mRNA_Seq | LOC103692173                            | 0.0010 | -1.3119 | Down |
| BHGZD vs. AIA-M_mRNA_Seq | LOC103692984                            | 0.0236 | 2.6544  | Up   |
| BHGZD vs. AIA-M_mRNA_Seq | LOC103694314                            | 0.0204 | -1.1254 | Down |
|                          | LOC108349606//LOC                       |        |         |      |
| BHGZD vs. AIA-M_mRNA_Seq | 108353795                               | 0.0047 | -1.0499 | Down |
| BHGZD vs. AIA-M_mRNA_Seq | LOC108350501                            | 0.0007 | -1.6288 | Down |

---

|                          |                     |        |         |      |
|--------------------------|---------------------|--------|---------|------|
|                          | LOC108350501//LOC   |        |         |      |
|                          | 108351482//LOC1083  |        |         |      |
| BHGZD vs. AIA-M_mRNA_Seq | 52650               | 0.0003 | -1.5678 | Down |
|                          | LOC108350502//LOC   |        |         |      |
| BHGZD vs. AIA-M_mRNA_Seq | 108353446           | 0.0006 | -1.5240 | Down |
| BHGZD vs. AIA-M_mRNA_Seq | LOC108351406        | 0.0304 | -4.1433 | Down |
| BHGZD vs. AIA-M_mRNA_Seq | LOC108351482        | 0.0026 | -1.3714 | Down |
| BHGZD vs. AIA-M_mRNA_Seq | LOC108352861        | 0.0154 | -1.0067 | Down |
| BHGZD vs. AIA-M_mRNA_Seq | LOC498222           | 0.0078 | -1.5868 | Down |
| BHGZD vs. AIA-M_mRNA_Seq | LOC498424           | 0.0275 | -1.1075 | Down |
| BHGZD vs. AIA-M_mRNA_Seq | LOC498555           | 0.0004 | -1.6347 | Down |
| BHGZD vs. AIA-M_mRNA_Seq | LOC679739           | 0.0439 | -2.2732 | Down |
| BHGZD vs. AIA-M_mRNA_Seq | LOC680700           | 0.0174 | -1.1102 | Down |
| BHGZD vs. AIA-M_mRNA_Seq | LOC680959           | 0.0049 | -2.3372 | Down |
|                          | LOC681182//LOC681   |        |         |      |
| BHGZD vs. AIA-M_mRNA_Seq | 341                 | 0.0000 | 1.0622  | Up   |
|                          | LOC682793//RPL38//  |        |         |      |
| BHGZD vs. AIA-M_mRNA_Seq | LOC690468           | 0.0000 | -1.7773 | Down |
|                          | LOC684762//LOC102   |        |         |      |
|                          | 548682//LOC1025491  |        |         |      |
| BHGZD vs. AIA-M_mRNA_Seq | 73                  | 0.0131 | -1.2133 | Down |
|                          | LOC684762//LOC684   |        |         |      |
|                          | 841//LOC102548682// |        |         |      |
| BHGZD vs. AIA-M_mRNA_Seq | LOC102549173        | 0.0290 | -1.2013 | Down |
|                          | LOC684762//LOC690   |        |         |      |
|                          | 126//LOC102548682// |        |         |      |
| BHGZD vs. AIA-M_mRNA_Seq | LOC102549173        | 0.0358 | -1.5651 | Down |

---

|                          |                   |        |         |      |
|--------------------------|-------------------|--------|---------|------|
| BHGZD vs. AIA-M_mRNA_Seq | LOC685085         | 0.0022 | -1.1059 | Down |
|                          | LOC685933//TBC1D1 |        |         |      |
| BHGZD vs. AIA-M_mRNA_Seq | 2                 | 0.0414 | 1.5340  | Up   |
| BHGZD vs. AIA-M_mRNA_Seq | LOC685963         | 0.0000 | -1.8704 | Down |
| BHGZD vs. AIA-M_mRNA_Seq | LOC688815         | 0.0133 | -1.4655 | Down |
| BHGZD vs. AIA-M_mRNA_Seq | LOC689574         | 0.0004 | -1.6061 | Down |
| BHGZD vs. AIA-M_mRNA_Seq | LOC689899         | 0.0070 | -1.1045 | Down |
| BHGZD vs. AIA-M_mRNA_Seq | LOC691418         | 0.0235 | -1.0361 | Down |
| BHGZD vs. AIA-M_mRNA_Seq | LOXL3             | 0.0002 | -1.4840 | Down |
| BHGZD vs. AIA-M_mRNA_Seq | LOXL4             | 0.0433 | -5.2438 | Down |
| BHGZD vs. AIA-M_mRNA_Seq | LRP4              | 0.0085 | -1.0556 | Down |
| BHGZD vs. AIA-M_mRNA_Seq | LRR1              | 0.0357 | -5.3247 | Down |
| BHGZD vs. AIA-M_mRNA_Seq | LRRC51            | 0.0204 | -1.2492 | Down |
| BHGZD vs. AIA-M_mRNA_Seq | LRRC71            | 0.0003 | -1.5799 | Down |
| BHGZD vs. AIA-M_mRNA_Seq | LTBP1             | 0.0009 | -1.3291 | Down |
| BHGZD vs. AIA-M_mRNA_Seq | LTK               | 0.0448 | -1.8038 | Down |
| BHGZD vs. AIA-M_mRNA_Seq | LY6G6C            | 0.0000 | -1.5001 | Down |
| BHGZD vs. AIA-M_mRNA_Seq | LY6G6F            | 0.0000 | -1.4740 | Down |
| BHGZD vs. AIA-M_mRNA_Seq | LY6L              | 0.0321 | 1.3637  | Up   |
| BHGZD vs. AIA-M_mRNA_Seq | LYL1              | 0.0011 | -1.3306 | Down |
| BHGZD vs. AIA-M_mRNA_Seq | LYVE1             | 0.0000 | -1.3934 | Down |
| BHGZD vs. AIA-M_mRNA_Seq | LZTS1             | 0.0151 | 1.8058  | Up   |
| BHGZD vs. AIA-M_mRNA_Seq | MAGED2            | 0.0001 | -1.2126 | Down |
| BHGZD vs. AIA-M_mRNA_Seq | MANBAL            | 0.0085 | -1.0353 | Down |
| BHGZD vs. AIA-M_mRNA_Seq | MAP1B             | 0.0102 | -1.1763 | Down |
| BHGZD vs. AIA-M_mRNA_Seq | MAP1LC3A          | 0.0013 | -1.2683 | Down |
| BHGZD vs. AIA-M_mRNA_Seq | MAP1LC3B          | 0.0006 | -1.5919 | Down |

|                          |                   |        |         |      |
|--------------------------|-------------------|--------|---------|------|
| BHGZD vs. AIA-M_mRNA_Seq | MAP1LC3B2         | 0.0175 | -1.4347 | Down |
|                          | MAP2K3//LOC103689 |        |         |      |
| BHGZD vs. AIA-M_mRNA_Seq | 956//LOC108348082 | 0.0047 | -1.1809 | Down |
|                          | MAP2K3//LOC108348 |        |         |      |
| BHGZD vs. AIA-M_mRNA_Seq | 082               | 0.0368 | -1.4296 | Down |
| BHGZD vs. AIA-M_mRNA_Seq | MAPK10            | 0.0155 | -1.5761 | Down |
| BHGZD vs. AIA-M_mRNA_Seq | MAPK8IP1          | 0.0016 | -2.4659 | Down |
| BHGZD vs. AIA-M_mRNA_Seq | MARCH2            | 0.0005 | -1.6508 | Down |
| BHGZD vs. AIA-M_mRNA_Seq | MARCH8            | 0.0098 | -1.1514 | Down |
| BHGZD vs. AIA-M_mRNA_Seq | MARK1             | 0.0248 | 1.0751  | Up   |
| BHGZD vs. AIA-M_mRNA_Seq | MAST1             | 0.0481 | -3.0588 | Down |
| BHGZD vs. AIA-M_mRNA_Seq | MAST4             | 0.0244 | -1.2505 | Down |
| BHGZD vs. AIA-M_mRNA_Seq | MB21D2            | 0.0004 | -1.4490 | Down |
| BHGZD vs. AIA-M_mRNA_Seq | MBOAT2            | 0.0312 | 1.3213  | Up   |
| BHGZD vs. AIA-M_mRNA_Seq | MCPT1L1           | 0.0000 | -1.7125 | Down |
| BHGZD vs. AIA-M_mRNA_Seq | MCRIP1            | 0.0033 | -1.0451 | Down |
| BHGZD vs. AIA-M_mRNA_Seq | MCUR1             | 0.0001 | -1.0092 | Down |
| BHGZD vs. AIA-M_mRNA_Seq | ME1               | 0.0000 | -1.5397 | Down |
| BHGZD vs. AIA-M_mRNA_Seq | MEA1              | 0.0035 | -1.1456 | Down |
| BHGZD vs. AIA-M_mRNA_Seq | MED12L            | 0.0000 | -1.4364 | Down |
| BHGZD vs. AIA-M_mRNA_Seq | MED25             | 0.0006 | -1.5579 | Down |
| BHGZD vs. AIA-M_mRNA_Seq | MELK              | 0.0439 | 2.0318  | Up   |
| BHGZD vs. AIA-M_mRNA_Seq | MEMO1             | 0.0108 | -1.1541 | Down |
| BHGZD vs. AIA-M_mRNA_Seq | MEST              | 0.0007 | -1.7263 | Down |
| BHGZD vs. AIA-M_mRNA_Seq | MFAP3L            | 0.0000 | -1.5052 | Down |
| BHGZD vs. AIA-M_mRNA_Seq | MFF               | 0.0028 | -1.3228 | Down |
| BHGZD vs. AIA-M_mRNA_Seq | MFSD12            | 0.0041 | -1.2594 | Down |

|                          |                   |        |         |      |
|--------------------------|-------------------|--------|---------|------|
| BHGZD vs. AIA-M_mRNA_Seq | MFSD2B            | 0.0101 | -1.4997 | Down |
| BHGZD vs. AIA-M_mRNA_Seq | MFSD6             | 0.0000 | -1.0233 | Down |
| BHGZD vs. AIA-M_mRNA_Seq | MGC94199          | 0.0195 | 1.5424  | Up   |
|                          | MGC94199//LOC1025 |        |         |      |
| BHGZD vs. AIA-M_mRNA_Seq | 54232             | 0.0216 | 1.9556  | Up   |
| BHGZD vs. AIA-M_mRNA_Seq | MGC95210          | 0.0007 | -1.4406 | Down |
| BHGZD vs. AIA-M_mRNA_Seq | MGLL              | 0.0005 | -1.6987 | Down |
| BHGZD vs. AIA-M_mRNA_Seq | MGRN1             | 0.0000 | -1.2031 | Down |
| BHGZD vs. AIA-M_mRNA_Seq | MGST3             | 0.0027 | -1.5163 | Down |
| BHGZD vs. AIA-M_mRNA_Seq | MICAL2            | 0.0019 | -1.3556 | Down |
| BHGZD vs. AIA-M_mRNA_Seq | MICAL3            | 0.0004 | -1.4663 | Down |
| BHGZD vs. AIA-M_mRNA_Seq | MKRN1             | 0.0017 | -1.4175 | Down |
| BHGZD vs. AIA-M_mRNA_Seq | MMD               | 0.0004 | -1.2623 | Down |
| BHGZD vs. AIA-M_mRNA_Seq | MMP28             | 0.0211 | -1.0628 | Down |
| BHGZD vs. AIA-M_mRNA_Seq | MMRN1             | 0.0000 | -1.5474 | Down |
| BHGZD vs. AIA-M_mRNA_Seq | MMRN2             | 0.0015 | 3.0209  | Up   |
| BHGZD vs. AIA-M_mRNA_Seq | MORC4             | 0.0001 | -1.4301 | Down |
| BHGZD vs. AIA-M_mRNA_Seq | MPG               | 0.0009 | -1.5303 | Down |
| BHGZD vs. AIA-M_mRNA_Seq | MPIG6B            | 0.0001 | -1.5224 | Down |
| BHGZD vs. AIA-M_mRNA_Seq | MPL               | 0.0000 | -1.5075 | Down |
| BHGZD vs. AIA-M_mRNA_Seq | MPP2              | 0.0387 | -1.1260 | Down |
| BHGZD vs. AIA-M_mRNA_Seq | MPPED2            | 0.0003 | -1.4039 | Down |
| BHGZD vs. AIA-M_mRNA_Seq | MPST              | 0.0005 | -1.7733 | Down |
| BHGZD vs. AIA-M_mRNA_Seq | MRPL37            | 0.0014 | -1.3539 | Down |
| BHGZD vs. AIA-M_mRNA_Seq | MRPL53            | 0.0048 | -1.1671 | Down |
| BHGZD vs. AIA-M_mRNA_Seq | MRPS36            | 0.0062 | -1.1319 | Down |
| BHGZD vs. AIA-M_mRNA_Seq | MRVI1             | 0.0000 | -1.4740 | Down |

|                          |                    |        |         |      |
|--------------------------|--------------------|--------|---------|------|
| BHGZD vs. AIA-M_mRNA_Seq | MSRA               | 0.0301 | -1.1511 | Down |
| BHGZD vs. AIA-M_mRNA_Seq | MTHFD2             | 0.0007 | -1.0831 | Down |
| BHGZD vs. AIA-M_mRNA_Seq | MTMR11             | 0.0440 | 3.3129  | Up   |
| BHGZD vs. AIA-M_mRNA_Seq | MUC20              | 0.0000 | -1.5329 | Down |
| BHGZD vs. AIA-M_mRNA_Seq | MXI1               | 0.0046 | -1.1420 | Down |
| BHGZD vs. AIA-M_mRNA_Seq | MYBL2              | 0.0208 | -1.2279 | Down |
| BHGZD vs. AIA-M_mRNA_Seq | MYCT1              | 0.0000 | -1.5488 | Down |
|                          | MYL6L//MYL6//MYL6  |        |         |      |
| BHGZD vs. AIA-M_mRNA_Seq | B//LOC100909726    | 0.0002 | -1.2505 | Down |
| BHGZD vs. AIA-M_mRNA_Seq | MYL9               | 0.0000 | -1.5114 | Down |
| BHGZD vs. AIA-M_mRNA_Seq | MYLK               | 0.0000 | -1.4627 | Down |
| BHGZD vs. AIA-M_mRNA_Seq | MYLK2              | 0.0009 | -1.5014 | Down |
| BHGZD vs. AIA-M_mRNA_Seq | MYO5C              | 0.0073 | -1.3306 | Down |
| BHGZD vs. AIA-M_mRNA_Seq | NABP2              | 0.0060 | -1.0200 | Down |
| BHGZD vs. AIA-M_mRNA_Seq | NAGS               | 0.0408 | -1.6725 | Down |
| BHGZD vs. AIA-M_mRNA_Seq | NAPA               | 0.0011 | -1.5382 | Down |
| BHGZD vs. AIA-M_mRNA_Seq | NATD1              | 0.0030 | -1.3747 | Down |
| BHGZD vs. AIA-M_mRNA_Seq | NCK2               | 0.0000 | -1.4045 | Down |
| BHGZD vs. AIA-M_mRNA_Seq | NCKAP1             | 0.0000 | -1.2797 | Down |
| BHGZD vs. AIA-M_mRNA_Seq | NCOA4              | 0.0077 | -1.0773 | Down |
| BHGZD vs. AIA-M_mRNA_Seq | NDC80              | 0.0356 | -1.0392 | Down |
| BHGZD vs. AIA-M_mRNA_Seq | NDUFA1             | 0.0003 | -1.5318 | Down |
|                          | NDUFA1//NEWGENE    |        |         |      |
|                          | _1560955//LOC10834 |        |         |      |
| BHGZD vs. AIA-M_mRNA_Seq | 8144               | 0.0008 | -1.4910 | Down |
| BHGZD vs. AIA-M_mRNA_Seq | NDUFA11            | 0.0049 | -1.2927 | Down |
| BHGZD vs. AIA-M_mRNA_Seq | NDUFA12            | 0.0057 | -1.0922 | Down |



|                          |                  |        |         |      |
|--------------------------|------------------|--------|---------|------|
| BHGZD vs. AIA-M_mRNA_Seq | NDUFA13          | 0.0059 | -1.1366 | Down |
| BHGZD vs. AIA-M_mRNA_Seq | NDUFAF8          | 0.0105 | -1.1756 | Down |
| BHGZD vs. AIA-M_mRNA_Seq | NDUFB11          | 0.0095 | -1.1127 | Down |
| BHGZD vs. AIA-M_mRNA_Seq | NDUFB2           | 0.0170 | -1.0173 | Down |
| BHGZD vs. AIA-M_mRNA_Seq | NDUFC1           | 0.0170 | -1.0310 | Down |
| BHGZD vs. AIA-M_mRNA_Seq | NEDD8            | 0.0011 | -1.3824 | Down |
| BHGZD vs. AIA-M_mRNA_Seq | NEK2//NEK2L1     | 0.0257 | -1.7163 | Down |
| BHGZD vs. AIA-M_mRNA_Seq | NEURL1           | 0.0000 | -1.4923 | Down |
| BHGZD vs. AIA-M_mRNA_Seq | NFE2             | 0.0007 | -1.2552 | Down |
| BHGZD vs. AIA-M_mRNA_Seq | NFKBIB           | 0.0009 | -1.3369 | Down |
| BHGZD vs. AIA-M_mRNA_Seq | NINJ2            | 0.0021 | -1.3729 | Down |
| BHGZD vs. AIA-M_mRNA_Seq | NIPA1            | 0.0087 | 3.1578  | Up   |
| BHGZD vs. AIA-M_mRNA_Seq | NLK              | 0.0000 | -1.1014 | Down |
| BHGZD vs. AIA-M_mRNA_Seq | NMRK1            | 0.0092 | -2.7614 | Down |
| BHGZD vs. AIA-M_mRNA_Seq | NOL4L            | 0.0414 | -1.9413 | Down |
|                          | NOS1AP//LOC10036 |        |         |      |
| BHGZD vs. AIA-M_mRNA_Seq | 1087             | 0.0077 | -1.2200 | Down |
| BHGZD vs. AIA-M_mRNA_Seq | NPTXR            | 0.0379 | -3.6461 | Down |
| BHGZD vs. AIA-M_mRNA_Seq | NPY              | 0.0003 | -1.4144 | Down |
| BHGZD vs. AIA-M_mRNA_Seq | NR4A3            | 0.0083 | -1.9842 | Down |
| BHGZD vs. AIA-M_mRNA_Seq | NRCAM            | 0.0089 | -1.2036 | Down |
| BHGZD vs. AIA-M_mRNA_Seq | NRG1             | 0.0093 | -1.3917 | Down |
| BHGZD vs. AIA-M_mRNA_Seq | NRGN             | 0.0001 | -1.4248 | Down |
| BHGZD vs. AIA-M_mRNA_Seq | NRIP3            | 0.0016 | -1.0978 | Down |
| BHGZD vs. AIA-M_mRNA_Seq | NRTN             | 0.0003 | -1.6553 | Down |
| BHGZD vs. AIA-M_mRNA_Seq | NT5C3A           | 0.0000 | -1.4062 | Down |
| BHGZD vs. AIA-M_mRNA_Seq | NUCB2            | 0.0001 | -1.2429 | Down |

|                          |         |        |         |      |
|--------------------------|---------|--------|---------|------|
| BHGZD vs. AIA-M_mRNA_Seq | NUDT2   | 0.0185 | -1.0576 | Down |
| BHGZD vs. AIA-M_mRNA_Seq | NUDT4   | 0.0015 | -1.2969 | Down |
| BHGZD vs. AIA-M_mRNA_Seq | NUP62CL | 0.0308 | -1.0537 | Down |
| BHGZD vs. AIA-M_mRNA_Seq | NUPR2   | 0.0001 | -1.8266 | Down |
| BHGZD vs. AIA-M_mRNA_Seq | NXF2    | 0.0093 | -5.4044 | Down |
| BHGZD vs. AIA-M_mRNA_Seq | NXT1    | 0.0008 | -1.6966 | Down |
| BHGZD vs. AIA-M_mRNA_Seq | OAS1G   | 0.0024 | 2.4580  | Up   |
| BHGZD vs. AIA-M_mRNA_Seq | OAZ1    | 0.0007 | -1.4725 | Down |
| BHGZD vs. AIA-M_mRNA_Seq | ODC1    | 0.0000 | -1.3426 | Down |
| BHGZD vs. AIA-M_mRNA_Seq | OLFM4   | 0.0336 | 1.1084  | Up   |
| BHGZD vs. AIA-M_mRNA_Seq | OLR1637 | 0.0109 | 2.8840  | Up   |
| BHGZD vs. AIA-M_mRNA_Seq | OLR59   | 0.0047 | -1.9336 | Down |
| BHGZD vs. AIA-M_mRNA_Seq | OPN3    | 0.0009 | -1.1988 | Down |
| BHGZD vs. AIA-M_mRNA_Seq | OPTN    | 0.0045 | -1.1834 | Down |
| BHGZD vs. AIA-M_mRNA_Seq | ORC6    | 0.0344 | 1.1976  | Up   |
| BHGZD vs. AIA-M_mRNA_Seq | ORMDL3  | 0.0002 | -1.1673 | Down |
| BHGZD vs. AIA-M_mRNA_Seq | OSBPL1A | 0.0001 | -1.0807 | Down |
| BHGZD vs. AIA-M_mRNA_Seq | OST4    | 0.0006 | -1.4842 | Down |
| BHGZD vs. AIA-M_mRNA_Seq | OTOA    | 0.0466 | -5.1508 | Down |
| BHGZD vs. AIA-M_mRNA_Seq | OTUB2   | 0.0095 | -1.1483 | Down |
| BHGZD vs. AIA-M_mRNA_Seq | P2RX1   | 0.0000 | -1.4235 | Down |
| BHGZD vs. AIA-M_mRNA_Seq | P2RY1   | 0.0000 | -1.6463 | Down |
| BHGZD vs. AIA-M_mRNA_Seq | P2RY12  | 0.0000 | -1.5602 | Down |
| BHGZD vs. AIA-M_mRNA_Seq | P3H3    | 0.0132 | 1.3148  | Up   |
| BHGZD vs. AIA-M_mRNA_Seq | PAIP2   | 0.0024 | -1.2009 | Down |
| BHGZD vs. AIA-M_mRNA_Seq | PAM     | 0.0001 | -1.2818 | Down |
| BHGZD vs. AIA-M_mRNA_Seq | PAQR6   | 0.0047 | -1.4019 | Down |

|                          |                   |        |         |      |
|--------------------------|-------------------|--------|---------|------|
| BHGZD vs. AIA-M_mRNA_Seq | PAQR9             | 0.0014 | -1.4533 | Down |
| BHGZD vs. AIA-M_mRNA_Seq | PARVB             | 0.0001 | -1.4990 | Down |
| BHGZD vs. AIA-M_mRNA_Seq | PASK              | 0.0386 | 1.2195  | Up   |
| BHGZD vs. AIA-M_mRNA_Seq | PATZ1             | 0.0001 | -1.2687 | Down |
| BHGZD vs. AIA-M_mRNA_Seq | PCDHGB5           | 0.0274 | 3.5018  | Up   |
| BHGZD vs. AIA-M_mRNA_Seq | PCMT1             | 0.0002 | -1.2344 | Down |
| BHGZD vs. AIA-M_mRNA_Seq | PCNP              | 0.0008 | -1.2251 | Down |
|                          | PCSK1N//LOC103690 |        |         |      |
| BHGZD vs. AIA-M_mRNA_Seq | 091//LOC108348172 | 0.0302 | -1.2303 | Down |
|                          | PCSK1N//LOC108348 |        |         |      |
| BHGZD vs. AIA-M_mRNA_Seq | 172               | 0.0063 | -1.4267 | Down |
| BHGZD vs. AIA-M_mRNA_Seq | PCSK6             | 0.0002 | -2.7458 | Down |
| BHGZD vs. AIA-M_mRNA_Seq | PDE3A             | 0.0001 | -1.4264 | Down |
| BHGZD vs. AIA-M_mRNA_Seq | PDE5A             | 0.0000 | -1.4466 | Down |
| BHGZD vs. AIA-M_mRNA_Seq | PDLIM1            | 0.0000 | -1.3929 | Down |
| BHGZD vs. AIA-M_mRNA_Seq | PDZK1IP1          | 0.0140 | -1.5762 | Down |
| BHGZD vs. AIA-M_mRNA_Seq | PEAR1             | 0.0000 | -1.3727 | Down |
| BHGZD vs. AIA-M_mRNA_Seq | PEBP1             | 0.0008 | -1.3536 | Down |
| BHGZD vs. AIA-M_mRNA_Seq | PECR              | 0.0187 | 1.0183  | Up   |
| BHGZD vs. AIA-M_mRNA_Seq | PF4               | 0.0004 | -1.4629 | Down |
| BHGZD vs. AIA-M_mRNA_Seq | PGAP1             | 0.0003 | 1.8565  | Up   |
| BHGZD vs. AIA-M_mRNA_Seq | PGLYRP3           | 0.0032 | -1.6226 | Down |
| BHGZD vs. AIA-M_mRNA_Seq | PGLYRP3B          | 0.0331 | -1.7295 | Down |
| BHGZD vs. AIA-M_mRNA_Seq | PGPEP1            | 0.0429 | 1.0256  | Up   |
| BHGZD vs. AIA-M_mRNA_Seq | PHB               | 0.0016 | -1.0872 | Down |
| BHGZD vs. AIA-M_mRNA_Seq | PHETA2            | 0.0091 | 1.3172  | Up   |
| BHGZD vs. AIA-M_mRNA_Seq | PHOSPHO1          | 0.0030 | -1.3974 | Down |

---

|                          |         |        |         |      |
|--------------------------|---------|--------|---------|------|
| BHGZD vs. AIA-M_mRNA_Seq | PI4K2B  | 0.0006 | -1.0575 | Down |
| BHGZD vs. AIA-M_mRNA_Seq | PIANP   | 0.0471 | -1.0732 | Down |
| BHGZD vs. AIA-M_mRNA_Seq | PIGQ    | 0.0074 | -1.0895 | Down |
| BHGZD vs. AIA-M_mRNA_Seq | PIM1    | 0.0031 | -1.1513 | Down |
| BHGZD vs. AIA-M_mRNA_Seq | PINK1   | 0.0003 | -1.4308 | Down |
| BHGZD vs. AIA-M_mRNA_Seq | PIP5K1B | 0.0036 | -1.1939 | Down |
| BHGZD vs. AIA-M_mRNA_Seq | PJA1    | 0.0000 | -1.0142 | Down |
| BHGZD vs. AIA-M_mRNA_Seq | PKD1L2  | 0.0013 | -1.6635 | Down |
| BHGZD vs. AIA-M_mRNA_Seq | PKIA    | 0.0002 | -1.3519 | Down |
| BHGZD vs. AIA-M_mRNA_Seq | PKLR    | 0.0007 | -1.7943 | Down |
| BHGZD vs. AIA-M_mRNA_Seq | PKN2    | 0.0037 | -1.1477 | Down |
| BHGZD vs. AIA-M_mRNA_Seq | PLA1A   | 0.0000 | -1.4809 | Down |
| BHGZD vs. AIA-M_mRNA_Seq | PLA2G2A | 0.0001 | -1.5044 | Down |
| BHGZD vs. AIA-M_mRNA_Seq | PLAT    | 0.0005 | 3.0763  | Up   |
| BHGZD vs. AIA-M_mRNA_Seq | PLEKHB1 | 0.0029 | -1.5719 | Down |
| BHGZD vs. AIA-M_mRNA_Seq | PLEKHH3 | 0.0216 | 1.2192  | Up   |
| BHGZD vs. AIA-M_mRNA_Seq | PLEKHJ1 | 0.0011 | -1.5404 | Down |
| BHGZD vs. AIA-M_mRNA_Seq | PLEKHO1 | 0.0010 | -1.5349 | Down |
| BHGZD vs. AIA-M_mRNA_Seq | PLOD2   | 0.0000 | -1.8337 | Down |
| BHGZD vs. AIA-M_mRNA_Seq | PLP1    | 0.0000 | -1.3573 | Down |
| BHGZD vs. AIA-M_mRNA_Seq | PLS1    | 0.0000 | -1.2310 | Down |
| BHGZD vs. AIA-M_mRNA_Seq | PLTP    | 0.0012 | -1.3760 | Down |
| BHGZD vs. AIA-M_mRNA_Seq | PNKD    | 0.0023 | -1.4333 | Down |
| BHGZD vs. AIA-M_mRNA_Seq | PON1    | 0.0253 | 1.6109  | Up   |
| BHGZD vs. AIA-M_mRNA_Seq | PPBP    | 0.0000 | -1.7361 | Down |
| BHGZD vs. AIA-M_mRNA_Seq | PPFIA4  | 0.0002 | -1.0912 | Down |
| BHGZD vs. AIA-M_mRNA_Seq | PPIF    | 0.0001 | -1.3334 | Down |

---

---

|                          |           |        |         |      |
|--------------------------|-----------|--------|---------|------|
| BHGZD vs. AIA-M_mRNA_Seq | PPM1E     | 0.0307 | 1.0831  | Up   |
| BHGZD vs. AIA-M_mRNA_Seq | PPP2R5B   | 0.0119 | -1.0650 | Down |
| BHGZD vs. AIA-M_mRNA_Seq | PRAF2     | 0.0011 | -1.6593 | Down |
| BHGZD vs. AIA-M_mRNA_Seq | PRDX2     | 0.0008 | -1.5057 | Down |
| BHGZD vs. AIA-M_mRNA_Seq | PRELID3A  | 0.0359 | -2.6534 | Down |
| BHGZD vs. AIA-M_mRNA_Seq | PRKAR2B   | 0.0000 | -1.2695 | Down |
| BHGZD vs. AIA-M_mRNA_Seq | PRKD1     | 0.0450 | 2.1290  | Up   |
| BHGZD vs. AIA-M_mRNA_Seq | PROCR     | 0.0004 | -1.4674 | Down |
| BHGZD vs. AIA-M_mRNA_Seq | PROSER2   | 0.0073 | -1.4237 | Down |
| BHGZD vs. AIA-M_mRNA_Seq | PRTFDC1   | 0.0001 | -1.4336 | Down |
| BHGZD vs. AIA-M_mRNA_Seq | PRXL2A    | 0.0060 | -1.2514 | Down |
| BHGZD vs. AIA-M_mRNA_Seq | PSENER    | 0.0005 | -1.5602 | Down |
| BHGZD vs. AIA-M_mRNA_Seq | PSMD4     | 0.0024 | -1.2502 | Down |
| BHGZD vs. AIA-M_mRNA_Seq | PSMD9     | 0.0014 | -1.3777 | Down |
| BHGZD vs. AIA-M_mRNA_Seq | PSME1-PS1 | 0.0089 | -1.4399 | Down |
| BHGZD vs. AIA-M_mRNA_Seq | PSMF1     | 0.0118 | -1.0468 | Down |
| BHGZD vs. AIA-M_mRNA_Seq | PTDSS2    | 0.0064 | -1.1168 | Down |
| BHGZD vs. AIA-M_mRNA_Seq | PTGS1     | 0.0000 | -1.5111 | Down |
| BHGZD vs. AIA-M_mRNA_Seq | PTOV1     | 0.0033 | -1.1137 | Down |
| BHGZD vs. AIA-M_mRNA_Seq | PTPN13    | 0.0331 | -2.6389 | Down |
| BHGZD vs. AIA-M_mRNA_Seq | PTPRJ     | 0.0001 | -1.1227 | Down |
| BHGZD vs. AIA-M_mRNA_Seq | PTTG1     | 0.0024 | -1.6067 | Down |
| BHGZD vs. AIA-M_mRNA_Seq | PTTG1IP   | 0.0001 | -1.0350 | Down |
| BHGZD vs. AIA-M_mRNA_Seq | R3HDM4    | 0.0014 | -1.2220 | Down |
| BHGZD vs. AIA-M_mRNA_Seq | RAB11A    | 0.0016 | -1.0218 | Down |
| BHGZD vs. AIA-M_mRNA_Seq | RAB27B    | 0.0005 | -1.2478 | Down |
| BHGZD vs. AIA-M_mRNA_Seq | RAB3IL1   | 0.0061 | -1.2725 | Down |

---

---

|                          |            |        |         |      |
|--------------------------|------------|--------|---------|------|
| BHGZD vs. AIA-M_mRNA_Seq | RAB43      | 0.0032 | -1.1207 | Down |
| BHGZD vs. AIA-M_mRNA_Seq | RABEPK     | 0.0047 | -1.1352 | Down |
| BHGZD vs. AIA-M_mRNA_Seq | RAC1       | 0.0002 | -1.0531 | Down |
| BHGZD vs. AIA-M_mRNA_Seq | RACK1      | 0.0031 | -1.1744 | Down |
| BHGZD vs. AIA-M_mRNA_Seq | RAD23A     | 0.0003 | -1.6208 | Down |
| BHGZD vs. AIA-M_mRNA_Seq | RAD51AP1   | 0.0048 | 1.6318  | Up   |
| BHGZD vs. AIA-M_mRNA_Seq | RAD51C     | 0.0409 | -1.0536 | Down |
| BHGZD vs. AIA-M_mRNA_Seq | RAMP3      | 0.0000 | -1.5240 | Down |
| BHGZD vs. AIA-M_mRNA_Seq | RANBP10    | 0.0240 | -1.0807 | Down |
| BHGZD vs. AIA-M_mRNA_Seq | RAP1GAP    | 0.0027 | 4.0986  | Up   |
| BHGZD vs. AIA-M_mRNA_Seq | RASGRP3    | 0.0002 | -1.2567 | Down |
| BHGZD vs. AIA-M_mRNA_Seq | RASL10A    | 0.0001 | -1.3945 | Down |
| BHGZD vs. AIA-M_mRNA_Seq | RASSF7     | 0.0275 | -1.2678 | Down |
| BHGZD vs. AIA-M_mRNA_Seq | RBM38      | 0.0069 | -1.3115 | Down |
| BHGZD vs. AIA-M_mRNA_Seq | RBMS2      | 0.0005 | -1.2979 | Down |
| BHGZD vs. AIA-M_mRNA_Seq | RBPMS2     | 0.0067 | -2.0492 | Down |
| BHGZD vs. AIA-M_mRNA_Seq | REC114     | 0.0011 | -1.5782 | Down |
| BHGZD vs. AIA-M_mRNA_Seq | REEP2      | 0.0000 | -1.4944 | Down |
| BHGZD vs. AIA-M_mRNA_Seq | REPS2      | 0.0000 | -6.6043 | Down |
| BHGZD vs. AIA-M_mRNA_Seq | RET        | 0.0002 | -1.1924 | Down |
| BHGZD vs. AIA-M_mRNA_Seq | REXO2      | 0.0008 | -1.3899 | Down |
| BHGZD vs. AIA-M_mRNA_Seq | RFFL       | 0.0007 | -1.3043 | Down |
| BHGZD vs. AIA-M_mRNA_Seq | RGD1309350 | 0.0006 | -1.7082 | Down |
| BHGZD vs. AIA-M_mRNA_Seq | RGD1309779 | 0.0446 | 1.5398  | Up   |
| BHGZD vs. AIA-M_mRNA_Seq | RGD1310166 | 0.0490 | -2.9606 | Down |
| BHGZD vs. AIA-M_mRNA_Seq | RGD1310507 | 0.0033 | -1.5821 | Down |
| BHGZD vs. AIA-M_mRNA_Seq | RGD1311575 | 0.0001 | -1.5037 | Down |

---

---

|                          |            |        |         |      |
|--------------------------|------------|--------|---------|------|
| BHGZD vs. AIA-M_mRNA_Seq | RGD1311739 | 0.0016 | -1.4109 | Down |
| BHGZD vs. AIA-M_mRNA_Seq | RGD1359634 | 0.0207 | 2.9925  | Up   |
| BHGZD vs. AIA-M_mRNA_Seq | RGD1560015 | 0.0002 | -1.1337 | Down |
| BHGZD vs. AIA-M_mRNA_Seq | RGD1562029 | 0.0108 | 3.8040  | Up   |
| BHGZD vs. AIA-M_mRNA_Seq | RGD1562036 | 0.0089 | -3.1653 | Down |
| BHGZD vs. AIA-M_mRNA_Seq | RGD1562080 | 0.0017 | -3.0379 | Down |
| BHGZD vs. AIA-M_mRNA_Seq | RGD1562402 | 0.0024 | -1.2785 | Down |
| BHGZD vs. AIA-M_mRNA_Seq | RGD1562420 | 0.0208 | -1.0369 | Down |
| BHGZD vs. AIA-M_mRNA_Seq | RGD1562451 | 0.0213 | -1.2808 | Down |
| BHGZD vs. AIA-M_mRNA_Seq | RGD1563222 | 0.0300 | -1.3581 | Down |
| BHGZD vs. AIA-M_mRNA_Seq | RGD1563861 | 0.0255 | -1.1131 | Down |
| BHGZD vs. AIA-M_mRNA_Seq | RGD1564129 | 0.0007 | -1.2745 | Down |
| BHGZD vs. AIA-M_mRNA_Seq | RGD1564480 | 0.0006 | -1.6024 | Down |
| BHGZD vs. AIA-M_mRNA_Seq | RGD1565410 | 0.0011 | 5.1452  | Up   |
| BHGZD vs. AIA-M_mRNA_Seq | RGD1566099 | 0.0012 | -1.6080 | Down |
| BHGZD vs. AIA-M_mRNA_Seq | RGD1566369 | 0.0075 | -1.0401 | Down |
| BHGZD vs. AIA-M_mRNA_Seq | RGL1       | 0.0010 | 1.1014  | Up   |
| BHGZD vs. AIA-M_mRNA_Seq | RGS10      | 0.0003 | -1.1043 | Down |
| BHGZD vs. AIA-M_mRNA_Seq | RGS18      | 0.0000 | -1.2328 | Down |
| BHGZD vs. AIA-M_mRNA_Seq | RGS6       | 0.0002 | -1.2242 | Down |
| BHGZD vs. AIA-M_mRNA_Seq | RHAG       | 0.0077 | -1.2140 | Down |
| BHGZD vs. AIA-M_mRNA_Seq | RHBDL3     | 0.0001 | -1.2811 | Down |
| BHGZD vs. AIA-M_mRNA_Seq | RHD        | 0.0078 | -1.3186 | Down |
| BHGZD vs. AIA-M_mRNA_Seq | RIMKLA     | 0.0058 | 3.9068  | Up   |
| BHGZD vs. AIA-M_mRNA_Seq | RIOK3      | 0.0017 | -1.3843 | Down |
| BHGZD vs. AIA-M_mRNA_Seq | RIPOR3     | 0.0000 | -7.2593 | Down |
| BHGZD vs. AIA-M_mRNA_Seq | RN7SL1     | 0.0149 | -1.2773 | Down |

---

---

|                          |                   |        |         |      |
|--------------------------|-------------------|--------|---------|------|
| BHGZD vs. AIA-M_mRNA_Seq | RNASEK            | 0.0008 | -1.0501 | Down |
| BHGZD vs. AIA-M_mRNA_Seq | RND1              | 0.0460 | 2.5463  | Up   |
| BHGZD vs. AIA-M_mRNA_Seq | RNF10             | 0.0015 | -1.4918 | Down |
| BHGZD vs. AIA-M_mRNA_Seq | RNF11L1           | 0.0001 | -1.3206 | Down |
| BHGZD vs. AIA-M_mRNA_Seq | RNF123            | 0.0034 | -1.2518 | Down |
| BHGZD vs. AIA-M_mRNA_Seq | RNF152            | 0.0459 | -1.5736 | Down |
| BHGZD vs. AIA-M_mRNA_Seq | RNF187            | 0.0012 | -1.4005 | Down |
| BHGZD vs. AIA-M_mRNA_Seq | RNF5              | 0.0006 | -1.5312 | Down |
| BHGZD vs. AIA-M_mRNA_Seq | RPAP1             | 0.0000 | -1.4851 | Down |
| BHGZD vs. AIA-M_mRNA_Seq | RPL10//RGD1563861 | 0.0010 | -1.4014 | Down |
| BHGZD vs. AIA-M_mRNA_Seq | RPL11             | 0.0010 | -1.2118 | Down |
| BHGZD vs. AIA-M_mRNA_Seq | RPL12             | 0.0023 | -1.2417 | Down |
| BHGZD vs. AIA-M_mRNA_Seq | RPL12-PS1         | 0.0027 | -1.1343 | Down |
| BHGZD vs. AIA-M_mRNA_Seq | RPL13             | 0.0011 | -1.2271 | Down |
| BHGZD vs. AIA-M_mRNA_Seq | RPL13A            | 0.0018 | -1.2561 | Down |
| BHGZD vs. AIA-M_mRNA_Seq | RPL15             | 0.0037 | -1.1421 | Down |
| BHGZD vs. AIA-M_mRNA_Seq | RPL17             | 0.0029 | -1.0626 | Down |
| BHGZD vs. AIA-M_mRNA_Seq | RPL18A            | 0.0007 | -1.5001 | Down |
| BHGZD vs. AIA-M_mRNA_Seq | RPL19             | 0.0033 | -1.1390 | Down |
| BHGZD vs. AIA-M_mRNA_Seq | RPL21             | 0.0003 | -1.4967 | Down |
| BHGZD vs. AIA-M_mRNA_Seq | RPL24             | 0.0008 | -1.3211 | Down |
| BHGZD vs. AIA-M_mRNA_Seq | RPL26             | 0.0007 | -1.5254 | Down |
| BHGZD vs. AIA-M_mRNA_Seq | RPL27A            | 0.0017 | -1.2827 | Down |
| BHGZD vs. AIA-M_mRNA_Seq | RPL28             | 0.0017 | -1.3151 | Down |
| BHGZD vs. AIA-M_mRNA_Seq | RPL29             | 0.0036 | -1.0916 | Down |
| BHGZD vs. AIA-M_mRNA_Seq | RPL30             | 0.0028 | -1.4105 | Down |
| BHGZD vs. AIA-M_mRNA_Seq | RPL31             | 0.0012 | -1.2807 | Down |

---



|                          |                     |        |         |      |
|--------------------------|---------------------|--------|---------|------|
| BHGZD vs. AIA-M_mRNA_Seq | RPL31L4             | 0.0044 | -1.0757 | Down |
| BHGZD vs. AIA-M_mRNA_Seq | RPL32               | 0.0028 | -1.0470 | Down |
| BHGZD vs. AIA-M_mRNA_Seq | RPL35               | 0.0010 | -1.4947 | Down |
|                          | RPL35A//LOC103690   |        |         |      |
| BHGZD vs. AIA-M_mRNA_Seq | 996//LOC108349682   | 0.0023 | -1.1413 | Down |
|                          | RPL35A//LOC103690   |        |         |      |
|                          | 996//LOC108349682// |        |         |      |
| BHGZD vs. AIA-M_mRNA_Seq | LOC108351058        | 0.0027 | -1.1384 | Down |
| BHGZD vs. AIA-M_mRNA_Seq | RPL36               | 0.0028 | -1.2333 | Down |
|                          | RPL36AL//RPL36A-    |        |         |      |
| BHGZD vs. AIA-M_mRNA_Seq | PS2//LOC108348287   | 0.0089 | -1.0490 | Down |
|                          | RPL37//LOC1003607   |        |         |      |
| BHGZD vs. AIA-M_mRNA_Seq | 81//LOC100360841    | 0.0011 | -1.6884 | Down |
|                          | RPL37A-             |        |         |      |
| BHGZD vs. AIA-M_mRNA_Seq | PS1//RPL37A         | 0.0010 | -1.3658 | Down |
| BHGZD vs. AIA-M_mRNA_Seq | RPL38-PS1           | 0.0001 | -1.8542 | Down |
| BHGZD vs. AIA-M_mRNA_Seq | RPL38-PS2           | 0.0038 | -1.3034 | Down |
| BHGZD vs. AIA-M_mRNA_Seq | RPL38-PS3           | 0.0001 | -1.7464 | Down |
|                          | RPL39//LOC1036908   |        |         |      |
|                          | 21//LOC103692785//L |        |         |      |
|                          | OC103692831//LOC1   |        |         |      |
|                          | 03693375//LOC10369  |        |         |      |
| BHGZD vs. AIA-M_mRNA_Seq | 4169//LOC103694404  | 0.0159 | -1.1673 | Down |
| BHGZD vs. AIA-M_mRNA_Seq | RPL4                | 0.0023 | -1.0453 | Down |
| BHGZD vs. AIA-M_mRNA_Seq | RPL41               | 0.0010 | -1.5483 | Down |
| BHGZD vs. AIA-M_mRNA_Seq | RPL7                | 0.0016 | -1.1948 | Down |
| BHGZD vs. AIA-M_mRNA_Seq | RPLP0               | 0.0008 | -1.4930 | Down |

---

|                          |                   |        |         |      |
|--------------------------|-------------------|--------|---------|------|
|                          | RPLP1//LOC1003605 |        |         |      |
| BHGZD vs. AIA-M_mRNA_Seq | 22                | 0.0009 | -1.5256 | Down |
|                          | RPLP2//LOC1009115 |        |         |      |
| BHGZD vs. AIA-M_mRNA_Seq | 75                | 0.0002 | -1.6001 | Down |
| BHGZD vs. AIA-M_mRNA_Seq | RPP25             | 0.0320 | -1.5779 | Down |
| BHGZD vs. AIA-M_mRNA_Seq | RPS10             | 0.0007 | -1.4712 | Down |
| BHGZD vs. AIA-M_mRNA_Seq | RPS10L1           | 0.0014 | -1.4354 | Down |
|                          | RPS12//LOC1003605 |        |         |      |
| BHGZD vs. AIA-M_mRNA_Seq | 73                | 0.0005 | -1.5406 | Down |
| BHGZD vs. AIA-M_mRNA_Seq | RPS13//LOC684988  | 0.0031 | -1.0147 | Down |
|                          | RPS14//LOC1009118 |        |         |      |
| BHGZD vs. AIA-M_mRNA_Seq | 47                | 0.0011 | -1.4683 | Down |
| BHGZD vs. AIA-M_mRNA_Seq | RPS15             | 0.0015 | -1.3394 | Down |
| BHGZD vs. AIA-M_mRNA_Seq | RPS15AL4          | 0.0100 | -1.1298 | Down |
| BHGZD vs. AIA-M_mRNA_Seq | RPS16             | 0.0035 | -1.2782 | Down |
| BHGZD vs. AIA-M_mRNA_Seq | RPS17             | 0.0019 | -1.2422 | Down |
| BHGZD vs. AIA-M_mRNA_Seq | RPS18             | 0.0042 | -1.2695 | Down |
| BHGZD vs. AIA-M_mRNA_Seq | RPS18L1           | 0.0005 | -1.6961 | Down |
| BHGZD vs. AIA-M_mRNA_Seq | RPS19             | 0.0030 | -1.2698 | Down |
|                          | RPS19//LOC1009103 |        |         |      |
| BHGZD vs. AIA-M_mRNA_Seq | 36                | 0.0052 | -1.0677 | Down |
| BHGZD vs. AIA-M_mRNA_Seq | RPS2              | 0.0054 | -1.0296 | Down |
| BHGZD vs. AIA-M_mRNA_Seq | RPS20             | 0.0018 | -1.3284 | Down |
| BHGZD vs. AIA-M_mRNA_Seq | RPS23             | 0.0017 | -1.2603 | Down |
| BHGZD vs. AIA-M_mRNA_Seq | RPS24             | 0.0023 | -1.2192 | Down |
| BHGZD vs. AIA-M_mRNA_Seq | RPS27A            | 0.0000 | -1.8142 | Down |

---

---

| RPS29//LOC1083526        |                  |        |         |      |
|--------------------------|------------------|--------|---------|------|
| BHGZD vs. AIA-M_mRNA_Seq | 50               | 0.0027 | -1.4120 | Down |
| BHGZD vs. AIA-M_mRNA_Seq | RPS3A            | 0.0015 | -1.2565 | Down |
| BHGZD vs. AIA-M_mRNA_Seq | RPS4X            | 0.0024 | -1.1839 | Down |
| BHGZD vs. AIA-M_mRNA_Seq | RPS4X-PS9//RPS4X | 0.0040 | -1.1573 | Down |
| BHGZD vs. AIA-M_mRNA_Seq | RPS5             | 0.0032 | -1.1458 | Down |
| BHGZD vs. AIA-M_mRNA_Seq | RPS6KB2          | 0.0027 | -1.2097 | Down |
| RPS7//LOC10036283        |                  |        |         |      |
| BHGZD vs. AIA-M_mRNA_Seq | 0                | 0.0040 | -1.0188 | Down |
| BHGZD vs. AIA-M_mRNA_Seq | RPS8             | 0.0026 | -1.0664 | Down |
| BHGZD vs. AIA-M_mRNA_Seq | RPSA             | 0.0017 | -1.2365 | Down |
| BHGZD vs. AIA-M_mRNA_Seq | RRM2B            | 0.0299 | 1.0285  | Up   |
| BHGZD vs. AIA-M_mRNA_Seq | RSAD2            | 0.0101 | -1.1132 | Down |
| BHGZD vs. AIA-M_mRNA_Seq | RSPH9            | 0.0169 | -4.9822 | Down |
| BHGZD vs. AIA-M_mRNA_Seq | RT1-HA           | 0.0230 | 1.1581  | Up   |
| BHGZD vs. AIA-M_mRNA_Seq | RT1-T24-1        | 0.0012 | -1.1816 | Down |
| BHGZD vs. AIA-M_mRNA_Seq | RTFDC1           | 0.0034 | -1.0165 | Down |
| BHGZD vs. AIA-M_mRNA_Seq | RTP4             | 0.0025 | 1.1822  | Up   |
| BHGZD vs. AIA-M_mRNA_Seq | RWDD2B           | 0.0063 | 1.1211  | Up   |
| BHGZD vs. AIA-M_mRNA_Seq | RXFP1            | 0.0033 | -1.2965 | Down |
| BHGZD vs. AIA-M_mRNA_Seq | SAG              | 0.0128 | -4.6040 | Down |
| BHGZD vs. AIA-M_mRNA_Seq | SAP30L           | 0.0001 | -1.0851 | Down |
| BHGZD vs. AIA-M_mRNA_Seq | SARS             | 0.0161 | -1.0873 | Down |
| BHGZD vs. AIA-M_mRNA_Seq | SAT2             | 0.0151 | -1.4751 | Down |
| BHGZD vs. AIA-M_mRNA_Seq | SCAI             | 0.0207 | 1.1195  | Up   |
| BHGZD vs. AIA-M_mRNA_Seq | SCAMP5           | 0.0000 | -1.7017 | Down |
| BHGZD vs. AIA-M_mRNA_Seq | SCARF1           | 0.0020 | -1.5817 | Down |

---

|                          |           |        |         |      |
|--------------------------|-----------|--------|---------|------|
| BHGZD vs. AIA-M_mRNA_Seq | SCLY      | 0.0024 | -1.4109 | Down |
| BHGZD vs. AIA-M_mRNA_Seq | SDC1      | 0.0391 | 1.2074  | Up   |
| BHGZD vs. AIA-M_mRNA_Seq | SEC14L5   | 0.0013 | -1.8066 | Down |
| BHGZD vs. AIA-M_mRNA_Seq | SEC61G    | 0.0013 | -1.6278 | Down |
| BHGZD vs. AIA-M_mRNA_Seq | SELENBP1  | 0.0147 | -1.1449 | Down |
| BHGZD vs. AIA-M_mRNA_Seq | SELENOK   | 0.0014 | -1.3013 | Down |
| BHGZD vs. AIA-M_mRNA_Seq | SELENOM   | 0.0251 | -1.5035 | Down |
| BHGZD vs. AIA-M_mRNA_Seq | SEMA5A    | 0.0003 | -4.0576 | Down |
| BHGZD vs. AIA-M_mRNA_Seq | SEMA6D    | 0.0003 | -1.2306 | Down |
| BHGZD vs. AIA-M_mRNA_Seq | SEPT10    | 0.0271 | 1.5958  | Up   |
| BHGZD vs. AIA-M_mRNA_Seq | SEPT8     | 0.0416 | -1.3064 | Down |
| BHGZD vs. AIA-M_mRNA_Seq | SERF2     | 0.0006 | -1.3055 | Down |
| BHGZD vs. AIA-M_mRNA_Seq | SERP2     | 0.0007 | -1.7643 | Down |
| BHGZD vs. AIA-M_mRNA_Seq | SERPINB11 | 0.0000 | -1.2382 | Down |
| BHGZD vs. AIA-M_mRNA_Seq | SERPINB8  | 0.0260 | 1.1425  | Up   |
| BHGZD vs. AIA-M_mRNA_Seq | SERPINE2  | 0.0397 | -1.4497 | Down |
| BHGZD vs. AIA-M_mRNA_Seq | SERPINF1  | 0.0046 | -2.6737 | Down |
| BHGZD vs. AIA-M_mRNA_Seq | SFTPD     | 0.0021 | -1.4149 | Down |
| BHGZD vs. AIA-M_mRNA_Seq | SH2D1B2   | 0.0000 | -1.5883 | Down |
| BHGZD vs. AIA-M_mRNA_Seq | SH3BGR    | 0.0077 | -1.3007 | Down |
| BHGZD vs. AIA-M_mRNA_Seq | SH3GLB1   | 0.0006 | -1.5723 | Down |
| BHGZD vs. AIA-M_mRNA_Seq | SH3RF2    | 0.0442 | -2.1533 | Down |
| BHGZD vs. AIA-M_mRNA_Seq | SH3YL1    | 0.0030 | -1.2224 | Down |
| BHGZD vs. AIA-M_mRNA_Seq | SHPK      | 0.0000 | -1.1246 | Down |
| BHGZD vs. AIA-M_mRNA_Seq | SIK3      | 0.0066 | -1.0021 | Down |
| BHGZD vs. AIA-M_mRNA_Seq | SIN3B     | 0.0005 | -1.2766 | Down |
| BHGZD vs. AIA-M_mRNA_Seq | SIRT2     | 0.0004 | -1.6874 | Down |

|                          |                   |        |         |      |
|--------------------------|-------------------|--------|---------|------|
| BHGZD vs. AIA-M_mRNA_Seq | SIX4              | 0.0380 | 3.7416  | Up   |
| BHGZD vs. AIA-M_mRNA_Seq | SKA1              | 0.0140 | -1.9499 | Down |
| BHGZD vs. AIA-M_mRNA_Seq | SKA3              | 0.0460 | -1.0119 | Down |
| BHGZD vs. AIA-M_mRNA_Seq | SLC18A2           | 0.0000 | -1.3524 | Down |
| BHGZD vs. AIA-M_mRNA_Seq | SLC22A23          | 0.0000 | -2.0738 | Down |
| BHGZD vs. AIA-M_mRNA_Seq | SLC24A3           | 0.0000 | -1.6236 | Down |
| BHGZD vs. AIA-M_mRNA_Seq | SLC25A18          | 0.0132 | -4.0128 | Down |
| BHGZD vs. AIA-M_mRNA_Seq | SLC25A37          | 0.0096 | -1.2201 | Down |
| BHGZD vs. AIA-M_mRNA_Seq | SLC25A38          | 0.0007 | -1.4819 | Down |
| BHGZD vs. AIA-M_mRNA_Seq | SLC25A39          | 0.0004 | -1.7307 | Down |
| BHGZD vs. AIA-M_mRNA_Seq | SLC2A4            | 0.0005 | -1.4783 | Down |
| BHGZD vs. AIA-M_mRNA_Seq | SLC30A10          | 0.0119 | -1.3482 | Down |
| BHGZD vs. AIA-M_mRNA_Seq | SLC35B1           | 0.0010 | -1.3289 | Down |
| BHGZD vs. AIA-M_mRNA_Seq | SLC38A5           | 0.0006 | -1.5494 | Down |
| BHGZD vs. AIA-M_mRNA_Seq | SLC3A2            | 0.0026 | -1.4234 | Down |
|                          | SLC40A1//LOC10091 |        |         |      |
| BHGZD vs. AIA-M_mRNA_Seq | 1874              | 0.0000 | -1.3934 | Down |
|                          | SLC40A1//NEWGEN   |        |         |      |
| BHGZD vs. AIA-M_mRNA_Seq | E_620180          | 0.0000 | -1.4706 | Down |
| BHGZD vs. AIA-M_mRNA_Seq | SLC43A1           | 0.0173 | -1.0722 | Down |
| BHGZD vs. AIA-M_mRNA_Seq | SLC48A1           | 0.0016 | -1.4264 | Down |
| BHGZD vs. AIA-M_mRNA_Seq | SLC4A1            | 0.0311 | -1.0723 | Down |
| BHGZD vs. AIA-M_mRNA_Seq | SLC6A4            | 0.0000 | -1.5201 | Down |
| BHGZD vs. AIA-M_mRNA_Seq | SLC7A5            | 0.0000 | -1.1010 | Down |
| BHGZD vs. AIA-M_mRNA_Seq | SLIT1             | 0.0111 | -1.0718 | Down |
|                          | SMAD9//LOC1036915 |        |         |      |
| BHGZD vs. AIA-M_mRNA_Seq | 56                | 0.0110 | -2.6856 | Down |

---

|                          |            |        |         |      |
|--------------------------|------------|--------|---------|------|
| BHGZD vs. AIA-M_mRNA_Seq | SMDT1      | 0.0027 | -1.2508 | Down |
| BHGZD vs. AIA-M_mRNA_Seq | SMIM1      | 0.0078 | -1.5768 | Down |
| BHGZD vs. AIA-M_mRNA_Seq | SMOX       | 0.0005 | -1.5696 | Down |
| BHGZD vs. AIA-M_mRNA_Seq | SMPD1      | 0.0001 | -1.1724 | Down |
| BHGZD vs. AIA-M_mRNA_Seq | SMPDL3B    | 0.0042 | -1.0129 | Down |
| BHGZD vs. AIA-M_mRNA_Seq | SMTN       | 0.0012 | -1.3597 | Down |
| BHGZD vs. AIA-M_mRNA_Seq | SNCA       | 0.0009 | -1.5606 | Down |
| BHGZD vs. AIA-M_mRNA_Seq | SNX3       | 0.0007 | -1.4851 | Down |
| BHGZD vs. AIA-M_mRNA_Seq | SNX33      | 0.0033 | -1.0010 | Down |
| BHGZD vs. AIA-M_mRNA_Seq | SOCS1      | 0.0073 | -1.0574 | Down |
| BHGZD vs. AIA-M_mRNA_Seq | SOWAHA     | 0.0024 | -1.6062 | Down |
| BHGZD vs. AIA-M_mRNA_Seq | SOX15      | 0.0243 | -6.8370 | Down |
| BHGZD vs. AIA-M_mRNA_Seq | SPECC1     | 0.0103 | -1.2139 | Down |
| BHGZD vs. AIA-M_mRNA_Seq | SPEF1      | 0.0071 | -1.2025 | Down |
| BHGZD vs. AIA-M_mRNA_Seq | SPRED2     | 0.0500 | 1.4641  | Up   |
| BHGZD vs. AIA-M_mRNA_Seq | SPRYD7     | 0.0083 | -1.0096 | Down |
| BHGZD vs. AIA-M_mRNA_Seq | SPTB       | 0.0129 | -1.1295 | Down |
| BHGZD vs. AIA-M_mRNA_Seq | SPTBN4     | 0.0014 | -1.0941 | Down |
| BHGZD vs. AIA-M_mRNA_Seq | SRC        | 0.0001 | -1.2069 | Down |
| BHGZD vs. AIA-M_mRNA_Seq | SRMS       | 0.0016 | 1.4440  | Up   |
| BHGZD vs. AIA-M_mRNA_Seq | SRPK3      | 0.0284 | 1.0772  | Up   |
| BHGZD vs. AIA-M_mRNA_Seq | SRXN1      | 0.0433 | -1.4114 | Down |
| BHGZD vs. AIA-M_mRNA_Seq | SSBP3      | 0.0006 | -1.4987 | Down |
| BHGZD vs. AIA-M_mRNA_Seq | SSMEM1     | 0.0031 | -2.2691 | Down |
| BHGZD vs. AIA-M_mRNA_Seq | SSR4       | 0.0011 | -1.3273 | Down |
| BHGZD vs. AIA-M_mRNA_Seq | ST3GAL2    | 0.0005 | -1.4417 | Down |
| BHGZD vs. AIA-M_mRNA_Seq | ST6GALNAC3 | 0.0177 | -1.0250 | Down |

---

---

|                          |         |        |         |      |
|--------------------------|---------|--------|---------|------|
| BHGZD vs. AIA-M_mRNA_Seq | STARD13 | 0.0142 | 1.1647  | Up   |
| BHGZD vs. AIA-M_mRNA_Seq | STARD6  | 0.0174 | -1.2440 | Down |
| BHGZD vs. AIA-M_mRNA_Seq | STIM1   | 0.0001 | -1.1853 | Down |
| BHGZD vs. AIA-M_mRNA_Seq | STOM    | 0.0000 | -1.3455 | Down |
| BHGZD vs. AIA-M_mRNA_Seq | STON2   | 0.0004 | -1.6397 | Down |
| BHGZD vs. AIA-M_mRNA_Seq | STRA8   | 0.0029 | -1.9002 | Down |
| BHGZD vs. AIA-M_mRNA_Seq | STRADB  | 0.0077 | -1.1604 | Down |
| BHGZD vs. AIA-M_mRNA_Seq | STX11   | 0.0000 | -1.1858 | Down |
| BHGZD vs. AIA-M_mRNA_Seq | STX5    | 0.0056 | -1.0121 | Down |
| BHGZD vs. AIA-M_mRNA_Seq | STXBP1  | 0.0002 | -1.5291 | Down |
| BHGZD vs. AIA-M_mRNA_Seq | SUDS3   | 0.0014 | -1.2449 | Down |
| BHGZD vs. AIA-M_mRNA_Seq | SUSD2   | 0.0419 | 1.0372  | Up   |
| BHGZD vs. AIA-M_mRNA_Seq | SV2A    | 0.0001 | -1.0481 | Down |
| BHGZD vs. AIA-M_mRNA_Seq | SVIP    | 0.0020 | -1.5149 | Down |
| BHGZD vs. AIA-M_mRNA_Seq | SYNGR1  | 0.0000 | -2.2628 | Down |
| BHGZD vs. AIA-M_mRNA_Seq | SYT5    | 0.0002 | -1.3477 | Down |
| BHGZD vs. AIA-M_mRNA_Seq | SYTL4   | 0.0001 | -1.6984 | Down |
| BHGZD vs. AIA-M_mRNA_Seq | TAL1    | 0.0000 | -1.5858 | Down |
| BHGZD vs. AIA-M_mRNA_Seq | TAX1BP1 | 0.0002 | -1.2792 | Down |
| BHGZD vs. AIA-M_mRNA_Seq | TAX1BP3 | 0.0005 | -1.0984 | Down |
| BHGZD vs. AIA-M_mRNA_Seq | TCF7L2  | 0.0225 | 1.1941  | Up   |
| BHGZD vs. AIA-M_mRNA_Seq | TCP11   | 0.0159 | -1.1927 | Down |
| BHGZD vs. AIA-M_mRNA_Seq | TCP11L1 | 0.0193 | -1.1538 | Down |
| BHGZD vs. AIA-M_mRNA_Seq | TENT5C  | 0.0020 | -1.2484 | Down |
| BHGZD vs. AIA-M_mRNA_Seq | TESC    | 0.0016 | -1.1924 | Down |
| BHGZD vs. AIA-M_mRNA_Seq | TEX2    | 0.0000 | -1.0473 | Down |
| BHGZD vs. AIA-M_mRNA_Seq | TFDP2   | 0.0026 | -1.3466 | Down |

---

|                          |                   |        |         |      |
|--------------------------|-------------------|--------|---------|------|
| BHGZD vs. AIA-M_mRNA_Seq | TGFB111           | 0.0264 | -1.0061 | Down |
| BHGZD vs. AIA-M_mRNA_Seq | TGIF2             | 0.0005 | -1.2433 | Down |
| BHGZD vs. AIA-M_mRNA_Seq | THBS1             | 0.0000 | -1.5613 | Down |
|                          | TIMM17B//LOC10091 |        |         |      |
| BHGZD vs. AIA-M_mRNA_Seq | 1130              | 0.0165 | -1.4451 | Down |
|                          | TIMM23//LOC100362 |        |         |      |
| BHGZD vs. AIA-M_mRNA_Seq | 432               | 0.0071 | -1.0061 | Down |
| BHGZD vs. AIA-M_mRNA_Seq | TIMP3             | 0.0004 | -1.6675 | Down |
| BHGZD vs. AIA-M_mRNA_Seq | TINAGL1           | 0.0006 | -1.8323 | Down |
| BHGZD vs. AIA-M_mRNA_Seq | TINF2             | 0.0048 | -1.1032 | Down |
| BHGZD vs. AIA-M_mRNA_Seq | TK1               | 0.0013 | -1.6205 | Down |
| BHGZD vs. AIA-M_mRNA_Seq | TLE5              | 0.0007 | -1.4037 | Down |
| BHGZD vs. AIA-M_mRNA_Seq | TLL2              | 0.0051 | -4.4050 | Down |
| BHGZD vs. AIA-M_mRNA_Seq | TMA7              | 0.0062 | 1.1763  | Up   |
| BHGZD vs. AIA-M_mRNA_Seq | TMBIM6            | 0.0006 | -1.4265 | Down |
| BHGZD vs. AIA-M_mRNA_Seq | TMCC2             | 0.0010 | -1.4845 | Down |
| BHGZD vs. AIA-M_mRNA_Seq | TMEFF2            | 0.0007 | -2.5595 | Down |
| BHGZD vs. AIA-M_mRNA_Seq | TMEM117           | 0.0000 | -1.4119 | Down |
| BHGZD vs. AIA-M_mRNA_Seq | TMEM134           | 0.0032 | -1.1218 | Down |
| BHGZD vs. AIA-M_mRNA_Seq | TMEM140           | 0.0001 | -1.3274 | Down |
| BHGZD vs. AIA-M_mRNA_Seq | TMEM144           | 0.0137 | -1.1567 | Down |
| BHGZD vs. AIA-M_mRNA_Seq | TMEM14C           | 0.0042 | -1.1619 | Down |
| BHGZD vs. AIA-M_mRNA_Seq | TMEM184A          | 0.0084 | -1.5175 | Down |
| BHGZD vs. AIA-M_mRNA_Seq | TMEM246           | 0.0016 | -1.4807 | Down |
| BHGZD vs. AIA-M_mRNA_Seq | TMEM256           | 0.0071 | -1.3970 | Down |
| BHGZD vs. AIA-M_mRNA_Seq | TMEM258B          | 0.0153 | -1.7226 | Down |
| BHGZD vs. AIA-M_mRNA_Seq | TMEM56            | 0.0015 | -2.3856 | Down |



|                          |                   |        |         |      |
|--------------------------|-------------------|--------|---------|------|
| BHGZD vs. AIA-M_mRNA_Seq | TMEM86B           | 0.0016 | -1.5648 | Down |
| BHGZD vs. AIA-M_mRNA_Seq | TMEM9             | 0.0134 | -1.0740 | Down |
| BHGZD vs. AIA-M_mRNA_Seq | TMEM97            | 0.0182 | 1.0210  | Up   |
| BHGZD vs. AIA-M_mRNA_Seq | TMIE              | 0.0037 | -1.3898 | Down |
| BHGZD vs. AIA-M_mRNA_Seq | TMOD1             | 0.0053 | -1.2447 | Down |
| BHGZD vs. AIA-M_mRNA_Seq | TNFRSF11A         | 0.0003 | 2.3900  | Up   |
| BHGZD vs. AIA-M_mRNA_Seq | TP53TG5           | 0.0168 | -3.3568 | Down |
| BHGZD vs. AIA-M_mRNA_Seq | TPD52L1           | 0.0012 | -1.2119 | Down |
| BHGZD vs. AIA-M_mRNA_Seq | TPM1              | 0.0021 | -1.4927 | Down |
| BHGZD vs. AIA-M_mRNA_Seq | TPM4              | 0.0001 | -1.1242 | Down |
| BHGZD vs. AIA-M_mRNA_Seq | TPRG1L            | 0.0019 | -1.2176 | Down |
| BHGZD vs. AIA-M_mRNA_Seq | TPT1              | 0.0002 | -1.6882 | Down |
| BHGZD vs. AIA-M_mRNA_Seq | TPX2              | 0.0033 | -1.3055 | Down |
| BHGZD vs. AIA-M_mRNA_Seq | TREML1            | 0.0002 | -1.4372 | Down |
|                          | TRIAP1//LOC100910 |        |         |      |
|                          | 137//NEWGENE_158  |        |         |      |
| BHGZD vs. AIA-M_mRNA_Seq | 6233              | 0.0003 | -1.1794 | Down |
|                          | TRIAP1//NEWGENE_  |        |         |      |
| BHGZD vs. AIA-M_mRNA_Seq | 1586233           | 0.0014 | -1.0307 | Down |
| BHGZD vs. AIA-M_mRNA_Seq | TRIL              | 0.0289 | -4.7701 | Down |
| BHGZD vs. AIA-M_mRNA_Seq | TRIM10            | 0.0045 | -1.5615 | Down |
| BHGZD vs. AIA-M_mRNA_Seq | TRIM17            | 0.0370 | -1.1120 | Down |
| BHGZD vs. AIA-M_mRNA_Seq | TRIM58            | 0.0051 | -1.3158 | Down |
| BHGZD vs. AIA-M_mRNA_Seq | TRIR              | 0.0043 | -1.0614 | Down |
| BHGZD vs. AIA-M_mRNA_Seq | TRMT9B            | 0.0007 | -1.6915 | Down |
| BHGZD vs. AIA-M_mRNA_Seq | TRPC6             | 0.0001 | -1.3142 | Down |
| BHGZD vs. AIA-M_mRNA_Seq | TSC22D1           | 0.0000 | -1.3799 | Down |

---

|                          |         |        |         |      |
|--------------------------|---------|--------|---------|------|
| BHGZD vs. AIA-M_mRNA_Seq | TSPAN12 | 0.0000 | -1.5640 | Down |
| BHGZD vs. AIA-M_mRNA_Seq | TSPAN17 | 0.0003 | -1.2472 | Down |
| BHGZD vs. AIA-M_mRNA_Seq | TSPAN33 | 0.0014 | -1.4014 | Down |
| BHGZD vs. AIA-M_mRNA_Seq | TSPAN5  | 0.0179 | -1.0485 | Down |
| BHGZD vs. AIA-M_mRNA_Seq | TSPAN9  | 0.0004 | -1.3575 | Down |
| BHGZD vs. AIA-M_mRNA_Seq | TSPO2   | 0.0007 | -1.6432 | Down |
| BHGZD vs. AIA-M_mRNA_Seq | TSPYL5  | 0.0340 | -1.5653 | Down |
| BHGZD vs. AIA-M_mRNA_Seq | TTC27   | 0.0001 | -1.1400 | Down |
| BHGZD vs. AIA-M_mRNA_Seq | TTYH3   | 0.0001 | -1.2176 | Down |
| BHGZD vs. AIA-M_mRNA_Seq | TUBA4A  | 0.0010 | -1.3379 | Down |
| BHGZD vs. AIA-M_mRNA_Seq | TUBB1   | 0.0000 | -1.7032 | Down |
| BHGZD vs. AIA-M_mRNA_Seq | TUBB2A  | 0.0001 | -1.3655 | Down |
| BHGZD vs. AIA-M_mRNA_Seq | TUBB2B  | 0.0017 | -1.0895 | Down |
| BHGZD vs. AIA-M_mRNA_Seq | TUBB4B  | 0.0010 | -1.4425 | Down |
| BHGZD vs. AIA-M_mRNA_Seq | TUSC2   | 0.0043 | -1.3212 | Down |
| BHGZD vs. AIA-M_mRNA_Seq | TXN1    | 0.0077 | -1.0425 | Down |
| BHGZD vs. AIA-M_mRNA_Seq | TXN2    | 0.0047 | -1.2682 | Down |
| BHGZD vs. AIA-M_mRNA_Seq | TYMS    | 0.0221 | -1.0200 | Down |
| BHGZD vs. AIA-M_mRNA_Seq | TYRO3   | 0.0000 | -1.7972 | Down |
| BHGZD vs. AIA-M_mRNA_Seq | UBA52   | 0.0002 | -1.7399 | Down |
| BHGZD vs. AIA-M_mRNA_Seq | UBAC1   | 0.0024 | -1.3939 | Down |
| BHGZD vs. AIA-M_mRNA_Seq | UBALD1  | 0.0005 | -1.1965 | Down |
| BHGZD vs. AIA-M_mRNA_Seq | UBASH3B | 0.0001 | -1.0896 | Down |
| BHGZD vs. AIA-M_mRNA_Seq | UBB     | 0.0007 | -1.4931 | Down |
| BHGZD vs. AIA-M_mRNA_Seq | UBE2B   | 0.0001 | -1.5589 | Down |
| BHGZD vs. AIA-M_mRNA_Seq | UBE2C   | 0.0026 | -1.4693 | Down |
| BHGZD vs. AIA-M_mRNA_Seq | UBE2E2  | 0.0016 | -1.4357 | Down |

---

|                          |                   |        |         |      |
|--------------------------|-------------------|--------|---------|------|
| BHGZD vs. AIA-M_mRNA_Seq | UBE2J1            | 0.0037 | -1.1665 | Down |
| BHGZD vs. AIA-M_mRNA_Seq | UBE2M             | 0.0014 | -1.3259 | Down |
| BHGZD vs. AIA-M_mRNA_Seq | UBE2O             | 0.0176 | -1.0614 | Down |
| BHGZD vs. AIA-M_mRNA_Seq | UBE2R2            | 0.0018 | -1.3996 | Down |
| BHGZD vs. AIA-M_mRNA_Seq | UBE2S             | 0.0012 | -1.2763 | Down |
|                          | UBE2V1//LOC679539 |        |         |      |
| BHGZD vs. AIA-M_mRNA_Seq | //LOC100912618    | 0.0012 | -1.4727 | Down |
| BHGZD vs. AIA-M_mRNA_Seq | UBL4A             | 0.0005 | -1.5293 | Down |
| BHGZD vs. AIA-M_mRNA_Seq | UBL7              | 0.0059 | -1.2809 | Down |
| BHGZD vs. AIA-M_mRNA_Seq | UBXN11            | 0.0005 | -1.6632 | Down |
| BHGZD vs. AIA-M_mRNA_Seq | UBXN2A            | 0.0058 | -1.2439 | Down |
| BHGZD vs. AIA-M_mRNA_Seq | UBXN6             | 0.0026 | -1.2152 | Down |
| BHGZD vs. AIA-M_mRNA_Seq | UCP2              | 0.0033 | -1.3519 | Down |
| BHGZD vs. AIA-M_mRNA_Seq | UNC13B            | 0.0000 | -1.4375 | Down |
| BHGZD vs. AIA-M_mRNA_Seq | UQCR10            | 0.0288 | -1.2418 | Down |
| BHGZD vs. AIA-M_mRNA_Seq | UQCRH             | 0.0006 | -1.5497 | Down |
| BHGZD vs. AIA-M_mRNA_Seq | UROD              | 0.0176 | -1.1135 | Down |
| BHGZD vs. AIA-M_mRNA_Seq | UROS              | 0.0032 | -1.6156 | Down |
| BHGZD vs. AIA-M_mRNA_Seq | USE1              | 0.0011 | -1.4692 | Down |
| BHGZD vs. AIA-M_mRNA_Seq | USP15             | 0.0114 | -1.1119 | Down |
| BHGZD vs. AIA-M_mRNA_Seq | USP27X            | 0.0004 | 4.4683  | Up   |
| BHGZD vs. AIA-M_mRNA_Seq | USP29             | 0.0153 | 1.1940  | Up   |
| BHGZD vs. AIA-M_mRNA_Seq | USP46             | 0.0006 | -1.2311 | Down |
| BHGZD vs. AIA-M_mRNA_Seq | UTS2R             | 0.0187 | -3.7157 | Down |
| BHGZD vs. AIA-M_mRNA_Seq | VASH1             | 0.0000 | -1.4343 | Down |
| BHGZD vs. AIA-M_mRNA_Seq | VBP1              | 0.0005 | -1.5982 | Down |
| BHGZD vs. AIA-M_mRNA_Seq | VIPR2             | 0.0000 | -1.4657 | Down |

|                          |                 |        |         |      |
|--------------------------|-----------------|--------|---------|------|
| BHGZD vs. AIA-M_mRNA_Seq | VNN3            | 0.0334 | 1.2322  | Up   |
| BHGZD vs. AIA-M_mRNA_Seq | VRK2            | 0.0090 | -1.1618 | Down |
| BHGZD vs. AIA-M_mRNA_Seq | VSIG2           | 0.0039 | -1.2263 | Down |
| BHGZD vs. AIA-M_mRNA_Seq | VWA3A           | 0.0059 | -5.5050 | Down |
| BHGZD vs. AIA-M_mRNA_Seq | VWF             | 0.0000 | -1.4591 | Down |
| BHGZD vs. AIA-M_mRNA_Seq | WBP1            | 0.0141 | -1.0701 | Down |
| BHGZD vs. AIA-M_mRNA_Seq | WBP2            | 0.0029 | -1.2298 | Down |
| BHGZD vs. AIA-M_mRNA_Seq | WDR34           | 0.0094 | -1.2365 | Down |
| BHGZD vs. AIA-M_mRNA_Seq | WDR45           | 0.0027 | -1.3246 | Down |
|                          | WDR62//NEWGENE_ |        |         |      |
| BHGZD vs. AIA-M_mRNA_Seq | 1306714         | 0.0265 | 1.6527  | Up   |
| BHGZD vs. AIA-M_mRNA_Seq | WNT11           | 0.0290 | -2.5134 | Down |
| BHGZD vs. AIA-M_mRNA_Seq | WNT2            | 0.0055 | -2.3451 | Down |
| BHGZD vs. AIA-M_mRNA_Seq | WWTR1           | 0.0010 | -1.8317 | Down |
| BHGZD vs. AIA-M_mRNA_Seq | XK              | 0.0000 | -1.4285 | Down |
| BHGZD vs. AIA-M_mRNA_Seq | XKR8            | 0.0002 | -1.4189 | Down |
| BHGZD vs. AIA-M_mRNA_Seq | YAP1            | 0.0002 | -1.9990 | Down |
| BHGZD vs. AIA-M_mRNA_Seq | YBX2            | 0.0003 | -1.7178 | Down |
| BHGZD vs. AIA-M_mRNA_Seq | YBX3            | 0.0010 | -1.5023 | Down |
| BHGZD vs. AIA-M_mRNA_Seq | YIPF3           | 0.0096 | -1.0152 | Down |
| BHGZD vs. AIA-M_mRNA_Seq | YPEL3           | 0.0016 | -1.3542 | Down |
| BHGZD vs. AIA-M_mRNA_Seq | YPEL5           | 0.0007 | -1.3825 | Down |
| BHGZD vs. AIA-M_mRNA_Seq | YWHAH           | 0.0001 | -1.1209 | Down |
| BHGZD vs. AIA-M_mRNA_Seq | ZBED5           | 0.0061 | -1.1077 | Down |
| BHGZD vs. AIA-M_mRNA_Seq | ZCCHC12         | 0.0024 | -2.1065 | Down |
| BHGZD vs. AIA-M_mRNA_Seq | ZDHHC2          | 0.0063 | -1.0562 | Down |
| BHGZD vs. AIA-M_mRNA_Seq | ZFAND2B         | 0.0004 | -1.3023 | Down |

---

|                          |             |        |         |      |
|--------------------------|-------------|--------|---------|------|
| BHGZD vs. AIA-M_mRNA_Seq | ZFP780B-PS1 | 0.0131 | 1.3243  | Up   |
| BHGZD vs. AIA-M_mRNA_Seq | ZWINT       | 0.0002 | -1.0175 | Down |

---

**Table S6 The topological feature of nodes in the interaction network of RA-candidate-marker gene-BHGZD-effective gene**

| <b>Node</b> | <b>Degree</b> | <b>Betweenness</b> | <b>Closeness</b> |
|-------------|---------------|--------------------|------------------|
| COX4I1      | 17.0000       | 0.0033             | 0.2943           |
| COX6C       | 15.0000       | 0.0044             | 0.2659           |
| TNFRSF14    | 2.0000        | 0.0002             | 0.2877           |
| BTLA        | 3.0000        | 0.0000             | 0.2493           |
| FOS         | 45.0000       | 0.0333             | 0.3907           |
| JUND        | 7.0000        | 0.0002             | 0.3234           |
| SERPINC1    | 30.0000       | 0.0064             | 0.3454           |
| F2          | 48.0000       | 0.0340             | 0.3900           |
| COX7C       | 14.0000       | 0.0003             | 0.2620           |
| COX5B       | 17.0000       | 0.0049             | 0.3002           |
| COX5A       | 20.0000       | 0.0100             | 0.3057           |
| FGG         | 38.0000       | 0.0039             | 0.3673           |
| FGA         | 40.0000       | 0.0066             | 0.3694           |
| FGB         | 28.0000       | 0.0018             | 0.3578           |
| ATP5A1      | 14.0000       | 0.0027             | 0.2969           |
| ATP5B       | 13.0000       | 0.0027             | 0.2983           |
| MT-CO2      | 23.0000       | 0.0162             | 0.3199           |
| NCOA2       | 22.0000       | 0.0032             | 0.3338           |
| AR          | 45.0000       | 0.0312             | 0.3936           |
| ASS1        | 6.0000        | 0.0011             | 0.2783           |
| ASL         | 6.0000        | 0.0001             | 0.2784           |
| COX6B1      | 15.0000       | 0.0001             | 0.2636           |
| JUN         | 55.0000       | 0.0347             | 0.4046           |

---

|               |         |        |        |
|---------------|---------|--------|--------|
| <b>NFKB1</b>  | 29.0000 | 0.0064 | 0.3618 |
| <b>NFKBIA</b> | 23.0000 | 0.0057 | 0.3574 |
| IFIT3         | 4.0000  | 0.0075 | 0.2981 |
| IFIT1         | 5.0000  | 0.0027 | 0.2695 |
| CSNK2B        | 5.0000  | 0.0001 | 0.2783 |
| CSNK2A1       | 12.0000 | 0.0048 | 0.3195 |
| MT-CO3        | 12.0000 | 0.0000 | 0.2597 |
| ITGB2         | 28.0000 | 0.0144 | 0.3472 |
| ITGAL         | 17.0000 | 0.0102 | 0.3330 |
| CDC20         | 24.0000 | 0.0052 | 0.2981 |
| PLK1          | 20.0000 | 0.0028 | 0.3040 |
| MT-CO1        | 14.0000 | 0.0008 | 0.2748 |
| <b>PIK3R1</b> | 52.0000 | 0.0170 | 0.3845 |
| <b>PIK3CA</b> | 49.0000 | 0.0130 | 0.3845 |
| ATP5C1        | 12.0000 | 0.0061 | 0.2672 |
| CDK1          | 36.0000 | 0.0384 | 0.3501 |
| ATF3          | 13.0000 | 0.0006 | 0.3286 |
| S100A9        | 3.0000  | 0.0002 | 0.2483 |
| S100A8        | 6.0000  | 0.0083 | 0.3154 |
| NCAPG         | 14.0000 | 0.0003 | 0.2680 |
| AURKB         | 18.0000 | 0.0039 | 0.2873 |
| ESPL1         | 14.0000 | 0.0034 | 0.2736 |
| SERPIND1      | 22.0000 | 0.0006 | 0.3370 |
| <b>AKT1</b>   | 77.0000 | 0.0734 | 0.4198 |
| HSP90AA1      | 51.0000 | 0.0542 | 0.3921 |
| NR3C1         | 35.0000 | 0.0184 | 0.3782 |
| CFB           | 2.0000  | 0.0000 | 0.2710 |

---

---

|          |         |        |        |
|----------|---------|--------|--------|
| C3       | 46.0000 | 0.0197 | 0.3562 |
| YARS     | 6.0000  | 0.0014 | 0.2670 |
| EPRS     | 16.0000 | 0.0258 | 0.3199 |
| CACNB1   | 8.0000  | 0.0025 | 0.2566 |
| CACNA2D1 | 8.0000  | 0.0002 | 0.2570 |
| NCOA1    | 30.0000 | 0.0195 | 0.3612 |
| PPARG    | 28.0000 | 0.0107 | 0.3624 |
| HSPA1A   | 12.0000 | 0.0010 | 0.3296 |
| CS       | 19.0000 | 0.0044 | 0.3056 |
| MDH2     | 15.0000 | 0.0028 | 0.2834 |
| ECT2     | 11.0000 | 0.0010 | 0.2761 |
| F10      | 16.0000 | 0.0031 | 0.3077 |
| OASL     | 4.0000  | 0.0040 | 0.2317 |
| ESR1     | 42.0000 | 0.0169 | 0.3875 |
| CACNB2   | 11.0000 | 0.0049 | 0.2658 |
| CACNA1C  | 17.0000 | 0.0337 | 0.3194 |
| COX6A2   | 14.0000 | 0.0003 | 0.2620 |
| GRIN2B   | 16.0000 | 0.0063 | 0.3311 |
| DLG4     | 26.0000 | 0.0300 | 0.3450 |
| CACNG1   | 7.0000  | 0.0001 | 0.2569 |
| CYP1A1   | 42.0000 | 0.0104 | 0.3247 |
| AHR      | 22.0000 | 0.0085 | 0.3679 |
| SKA1     | 14.0000 | 0.0015 | 0.2765 |
| TOP2A    | 16.0000 | 0.0008 | 0.2734 |
| PROC     | 24.0000 | 0.0008 | 0.3410 |
| LSM6     | 2.0000  | 0.0000 | 0.2423 |
| SF3B3    | 3.0000  | 0.0031 | 0.2423 |

---



---

|         |         |        |        |
|---------|---------|--------|--------|
| CDC25B  | 8.0000  | 0.0001 | 0.2814 |
| EIF3F   | 3.0000  | 0.0011 | 0.2765 |
| RPS26   | 5.0000  | 0.0048 | 0.2568 |
| CTTN    | 13.0000 | 0.0067 | 0.3340 |
| SRC     | 83.0000 | 0.1233 | 0.4292 |
| GRIN2A  | 14.0000 | 0.0062 | 0.3255 |
| EGLN1   | 5.0000  | 0.0024 | 0.3143 |
| AKR1C1  | 11.0000 | 0.0001 | 0.2771 |
| AKR1C3  | 21.0000 | 0.0046 | 0.3141 |
| HDAC2   | 16.0000 | 0.0104 | 0.3150 |
| SMARCA5 | 7.0000  | 0.0010 | 0.2890 |
| TPI1    | 22.0000 | 0.0267 | 0.3326 |
| GAPDHS  | 4.0000  | 0.0007 | 0.3114 |
| ACO2    | 11.0000 | 0.0010 | 0.2931 |
| PIK3CD  | 15.0000 | 0.0005 | 0.3286 |
| ESR2    | 20.0000 | 0.0037 | 0.3576 |
| NR1H4   | 14.0000 | 0.0070 | 0.3123 |
| NFKB2   | 9.0000  | 0.0001 | 0.3218 |
| GATA1   | 7.0000  | 0.0037 | 0.3184 |
| TAL1    | 1.0000  | 0.0000 | 0.2416 |
| PPARA   | 22.0000 | 0.0069 | 0.3556 |
| COX7B   | 12.0000 | 0.0000 | 0.2597 |
| POMC    | 41.0000 | 0.0237 | 0.3704 |
| AGRP    | 2.0000  | 0.0000 | 0.2922 |
| HSD3B1  | 21.0000 | 0.0090 | 0.3126 |
| CYP11A1 | 10.0000 | 0.0036 | 0.2865 |
| UGT1A3  | 29.0000 | 0.0019 | 0.2899 |

---

---

|            |         |        |        |
|------------|---------|--------|--------|
| UGT1A1     | 39.0000 | 0.0061 | 0.3085 |
| GRIN1      | 20.0000 | 0.0346 | 0.3432 |
| NRG2       | 7.0000  | 0.0000 | 0.3242 |
| ERBB3      | 20.0000 | 0.0007 | 0.3523 |
| VEGFA      | 75.0000 | 0.0477 | 0.4021 |
| EGF        | 62.0000 | 0.0318 | 0.4001 |
| IGF1       | 53.0000 | 0.0134 | 0.3905 |
| ADH1B      | 14.0000 | 0.0005 | 0.2694 |
| ALDH2      | 10.0000 | 0.0081 | 0.2918 |
| RUVBL2     | 6.0000  | 0.0042 | 0.2918 |
| PIH1D1     | 2.0000  | 0.0000 | 0.2827 |
| <b>IL6</b> | 90.0000 | 0.0783 | 0.4214 |
| SOCS3      | 22.0000 | 0.0149 | 0.3495 |
| <b>TNF</b> | 62.0000 | 0.0352 | 0.4031 |
| PTPN1      | 23.0000 | 0.0071 | 0.3527 |
| CDC6       | 15.0000 | 0.0020 | 0.2992 |
| HGF        | 36.0000 | 0.0028 | 0.3702 |
| SLC51B     | 4.0000  | 0.0000 | 0.2406 |
| SLC51A     | 4.0000  | 0.0000 | 0.2419 |
| FKBP5      | 12.0000 | 0.0008 | 0.3235 |
| AKR1C2     | 7.0000  | 0.0002 | 0.2622 |
| GABRG2     | 17.0000 | 0.0080 | 0.2617 |
| GABRA1     | 18.0000 | 0.0115 | 0.2605 |
| CACNA1S    | 9.0000  | 0.0008 | 0.2663 |
| CCL5       | 35.0000 | 0.0099 | 0.3521 |
| PF4        | 39.0000 | 0.0031 | 0.3543 |
| THBS1      | 24.0000 | 0.0084 | 0.3423 |

---

---

|             |         |        |        |
|-------------|---------|--------|--------|
| CENPU       | 14.0000 | 0.0005 | 0.2766 |
| CENPT       | 9.0000  | 0.0003 | 0.2750 |
| PARP1       | 11.0000 | 0.0050 | 0.3335 |
| CASP3       | 31.0000 | 0.0252 | 0.3852 |
| ACTB        | 26.0000 | 0.0146 | 0.3728 |
| GABRB2      | 17.0000 | 0.0170 | 0.2692 |
| <b>IL1B</b> | 47.0000 | 0.0117 | 0.3829 |
| QDPR        | 5.0000  | 0.0007 | 0.2633 |
| SPR         | 9.0000  | 0.0031 | 0.3188 |
| CEBPB       | 20.0000 | 0.0017 | 0.3421 |
| KLHL13      | 8.0000  | 0.0001 | 0.2701 |
| ALOX5       | 16.0000 | 0.0106 | 0.3202 |
| LTC4S       | 1.0000  | 0.0000 | 0.2426 |
| COX8A       | 12.0000 | 0.0007 | 0.2623 |
| NLRP3       | 8.0000  | 0.0002 | 0.3191 |
| ALB         | 74.0000 | 0.0715 | 0.4155 |
| CLU         | 30.0000 | 0.0119 | 0.3566 |
| APP         | 75.0000 | 0.0497 | 0.4100 |
| RYR1        | 8.0000  | 0.0007 | 0.2595 |
| F2RL3       | 14.0000 | 0.0023 | 0.3252 |
| F11         | 12.0000 | 0.0000 | 0.2917 |
| ITGB3       | 27.0000 | 0.0088 | 0.3562 |
| ITGA5       | 12.0000 | 0.0024 | 0.3263 |
| GABRA5      | 15.0000 | 0.0018 | 0.2235 |
| CYP19A1     | 25.0000 | 0.0103 | 0.3461 |
| DNMT1       | 9.0000  | 0.0009 | 0.3389 |
| HSPA2       | 14.0000 | 0.0108 | 0.3120 |

---

---

|          |         |        |        |
|----------|---------|--------|--------|
| MAOB     | 14.0000 | 0.0035 | 0.2789 |
| COMT     | 15.0000 | 0.0021 | 0.2837 |
| RARG     | 6.0000  | 0.0023 | 0.3090 |
| VWF      | 42.0000 | 0.0155 | 0.3713 |
| SERPINE2 | 8.0000  | 0.0001 | 0.2969 |
| PGR      | 22.0000 | 0.0037 | 0.3590 |
| SNCA     | 8.0000  | 0.0014 | 0.3335 |
| HSPA1B   | 8.0000  | 0.0000 | 0.3054 |
| NOS2     | 20.0000 | 0.0095 | 0.3628 |
| HSD17B1  | 14.0000 | 0.0004 | 0.2953 |
| GABRB3   | 13.0000 | 0.0000 | 0.2151 |
| GABRA6   | 14.0000 | 0.0000 | 0.2170 |
| CCL4     | 36.0000 | 0.0058 | 0.3726 |
| CCL3     | 11.0000 | 0.0000 | 0.3207 |
| ALDOC    | 13.0000 | 0.0015 | 0.3028 |
| JAK1     | 23.0000 | 0.0052 | 0.3531 |
| SERPINA1 | 35.0000 | 0.0139 | 0.3545 |
| FCGRT    | 1.0000  | 0.0000 | 0.2937 |
| NGFR     | 19.0000 | 0.0015 | 0.3387 |
| ADH1A    | 14.0000 | 0.0005 | 0.2694 |
| YAP1     | 10.0000 | 0.0014 | 0.3333 |
| ABL1     | 20.0000 | 0.0056 | 0.3626 |
| TNFSF13B | 4.0000  | 0.0000 | 0.3170 |
| CXCL2    | 24.0000 | 0.0010 | 0.3447 |
| GAB1     | 18.0000 | 0.0006 | 0.3487 |
| GABRA4   | 15.0000 | 0.0031 | 0.2171 |
| PIK3CG   | 4.0000  | 0.0000 | 0.3057 |

---

---

|         |         |        |        |
|---------|---------|--------|--------|
| IDH2    | 9.0000  | 0.0006 | 0.2895 |
| FGF1    | 14.0000 | 0.0034 | 0.3175 |
| FGF2    | 41.0000 | 0.0196 | 0.3751 |
| PPBP    | 40.0000 | 0.0074 | 0.3634 |
| GABRB1  | 15.0000 | 0.0031 | 0.2171 |
| GRIN2C  | 8.0000  | 0.0000 | 0.2725 |
| SLC25A4 | 5.0000  | 0.0001 | 0.2505 |
| LPL     | 18.0000 | 0.0134 | 0.3405 |
| EDN1    | 41.0000 | 0.0232 | 0.3843 |
| PLAT    | 9.0000  | 0.0017 | 0.3253 |
| IDH1    | 19.0000 | 0.0054 | 0.3293 |
| HCK     | 24.0000 | 0.0058 | 0.3527 |
| KHSRP   | 2.0000  | 0.0000 | 0.2962 |
| SDC4    | 12.0000 | 0.0095 | 0.3352 |
| GNAS    | 15.0000 | 0.0016 | 0.3410 |
| ADCY2   | 28.0000 | 0.0054 | 0.3368 |
| AHRR    | 3.0000  | 0.0002 | 0.2765 |
| GABRA2  | 15.0000 | 0.0000 | 0.2171 |
| GABRA3  | 14.0000 | 0.0000 | 0.2170 |
| CYP2C19 | 28.0000 | 0.0021 | 0.3111 |
| CYP2C9  | 31.0000 | 0.0021 | 0.3113 |
| DHFR    | 11.0000 | 0.0038 | 0.3061 |
| CSF1    | 27.0000 | 0.0018 | 0.3543 |
| UNC13B  | 3.0000  | 0.0062 | 0.1957 |
| PPFIA1  | 2.0000  | 0.0000 | 0.1638 |
| CYP3A4  | 47.0000 | 0.0160 | 0.3299 |
| GRIN2D  | 10.0000 | 0.0005 | 0.2968 |

---

---

|        |         |        |        |
|--------|---------|--------|--------|
| APRT   | 8.0000  | 0.0023 | 0.2863 |
| ATIC   | 8.0000  | 0.0050 | 0.3140 |
| PTGS2  | 43.0000 | 0.0177 | 0.3815 |
| VDR    | 10.0000 | 0.0025 | 0.3111 |
| GP9    | 14.0000 | 0.0003 | 0.3071 |
| CAT    | 35.0000 | 0.0356 | 0.3806 |
| DAO    | 8.0000  | 0.0039 | 0.3046 |
| PTGS1  | 13.0000 | 0.0021 | 0.3030 |
| ADH1C  | 14.0000 | 0.0005 | 0.2694 |
| CBR1   | 12.0000 | 0.0016 | 0.2835 |
| FABP6  | 8.0000  | 0.0038 | 0.3046 |
| HAO1   | 9.0000  | 0.0008 | 0.3128 |
| GRM5   | 20.0000 | 0.0252 | 0.3380 |
| YWHAE  | 13.0000 | 0.0043 | 0.3211 |
| LARS2  | 3.0000  | 0.0000 | 0.2438 |
| PLOD2  | 8.0000  | 0.0010 | 0.2425 |
| PLOD1  | 8.0000  | 0.0010 | 0.2425 |
| CEBPD  | 9.0000  | 0.0002 | 0.3095 |
| GRIN3A | 9.0000  | 0.0011 | 0.2748 |
| HCAR3  | 17.0000 | 0.0000 | 0.3137 |
| HCAR2  | 17.0000 | 0.0000 | 0.3137 |
| RUNX2  | 18.0000 | 0.0050 | 0.3445 |
| BGLAP  | 13.0000 | 0.0017 | 0.3373 |
| RHOC   | 11.0000 | 0.0052 | 0.3273 |
| ADCY5  | 28.0000 | 0.0054 | 0.3368 |
| MTNR1B | 19.0000 | 0.0026 | 0.3175 |
| TTR    | 18.0000 | 0.0054 | 0.3419 |

---

---

|         |         |        |        |
|---------|---------|--------|--------|
| CYP1B1  | 23.0000 | 0.0055 | 0.3266 |
| RAB9A   | 2.0000  | 1.0000 | 1.0000 |
| DENND2C | 1.0000  | 0.0000 | 0.6667 |
| UGT2B7  | 31.0000 | 0.0029 | 0.2991 |
| FCGR2A  | 8.0000  | 0.0002 | 0.3347 |
| CYP3A7  | 18.0000 | 0.0003 | 0.2810 |
| CYP3A5  | 32.0000 | 0.0018 | 0.3020 |
| GRIK1   | 2.0000  | 0.0000 | 0.2676 |
| PPIF    | 7.0000  | 0.0022 | 0.3028 |
| PPP1CC  | 23.0000 | 0.0165 | 0.3005 |
| S100A13 | 2.0000  | 0.0001 | 0.2455 |
| RET     | 9.0000  | 0.0032 | 0.3222 |
| NR0B1   | 6.0000  | 0.0038 | 0.2984 |
| CDK6    | 9.0000  | 0.0011 | 0.3195 |
| LEPRE1  | 10.0000 | 0.0035 | 0.2443 |
| COL1A1  | 19.0000 | 0.0280 | 0.3170 |
| DBH     | 4.0000  | 0.0000 | 0.2408 |
| NR3C2   | 13.0000 | 0.0024 | 0.3255 |
| CRABP1  | 3.0000  | 0.0000 | 0.2444 |
| CYP26A1 | 19.0000 | 0.0044 | 0.2860 |
| PRDX5   | 3.0000  | 0.0001 | 0.2816 |
| CD3G    | 16.0000 | 0.0073 | 0.3252 |
| ITK     | 8.0000  | 0.0029 | 0.3200 |
| GSTP1   | 22.0000 | 0.0070 | 0.3255 |
| PRDX6   | 13.0000 | 0.0064 | 0.3095 |
| GP1BB   | 10.0000 | 0.0001 | 0.2994 |
| RHOB    | 12.0000 | 0.0086 | 0.3421 |

---

---

|         |         |        |        |
|---------|---------|--------|--------|
| NR1I3   | 15.0000 | 0.0003 | 0.2947 |
| CYP1A2  | 32.0000 | 0.0024 | 0.3044 |
| GRB10   | 6.0000  | 0.0062 | 0.3184 |
| F7      | 7.0000  | 0.0001 | 0.3023 |
| PPP1R3B | 4.0000  | 0.0019 | 0.2449 |
| PTK2B   | 13.0000 | 0.0039 | 0.3456 |
| CRABP2  | 3.0000  | 0.0004 | 0.2487 |
| SLCO1B1 | 20.0000 | 0.0040 | 0.3132 |
| SELP    | 18.0000 | 0.0072 | 0.3539 |
| HSD11B1 | 13.0000 | 0.0108 | 0.3095 |
| IL7     | 17.0000 | 0.0037 | 0.3313 |
| SULT1E1 | 10.0000 | 0.0000 | 0.2770 |
| NR1I2   | 25.0000 | 0.0086 | 0.3108 |
| KCNA2   | 6.0000  | 0.0063 | 0.2728 |
| NEDD4L  | 8.0000  | 0.0003 | 0.2754 |
| UBA1    | 10.0000 | 0.0030 | 0.2874 |
| F11R    | 6.0000  | 0.0001 | 0.3037 |
| PYGL    | 6.0000  | 0.0027 | 0.2572 |
| PYGM    | 6.0000  | 0.0021 | 0.2562 |
| CD8A    | 6.0000  | 0.0002 | 0.3119 |
| DUSP1   | 13.0000 | 0.0012 | 0.3271 |
| ALOX15  | 15.0000 | 0.0013 | 0.3270 |
| GSTM4   | 19.0000 | 0.0009 | 0.2985 |
| GSTM5   | 17.0000 | 0.0001 | 0.2757 |
| ITPA    | 11.0000 | 0.0024 | 0.2903 |
| PCYT1B  | 3.0000  | 0.0002 | 0.2220 |
| PCYT1A  | 4.0000  | 0.0027 | 0.2726 |

---



---

|         |         |        |        |
|---------|---------|--------|--------|
| ELN     | 11.0000 | 0.0043 | 0.3284 |
| LOXL3   | 1.0000  | 0.0000 | 0.2473 |
| MYL9    | 6.0000  | 0.0045 | 0.2914 |
| CES1    | 6.0000  | 0.0041 | 0.2525 |
| ACTA1   | 10.0000 | 0.0018 | 0.3418 |
| AKR1B1  | 14.0000 | 0.0081 | 0.3174 |
| PEX10   | 7.0000  | 0.0039 | 0.3023 |
| SFTPA1  | 1.0000  | 0.0000 | 0.2030 |
| SFTPD   | 2.0000  | 0.0031 | 0.2546 |
| MNDA    | 11.0000 | 0.0020 | 0.2918 |
| LYZ     | 18.0000 | 0.0031 | 0.3189 |
| OSM     | 12.0000 | 0.0002 | 0.3239 |
| ABCB11  | 12.0000 | 0.0023 | 0.2504 |
| PROS1   | 20.0000 | 0.0031 | 0.3382 |
| PTPN13  | 4.0000  | 0.0031 | 0.3080 |
| PLEKHA1 | 1.0000  | 0.0000 | 0.2356 |
| TTC30B  | 2.0000  | 0.0031 | 0.2272 |
| KIFAP3  | 1.0000  | 0.0000 | 0.1852 |
| ANXA1   | 31.0000 | 0.0067 | 0.3574 |
| TRIM72  | 1.0000  | 0.0000 | 0.2634 |
| PRF1    | 9.0000  | 0.0038 | 0.3120 |
| GNLY    | 2.0000  | 0.0000 | 0.2380 |
| GSTM3   | 19.0000 | 0.0028 | 0.3167 |
| GNPDA1  | 3.0000  | 0.0002 | 0.2670 |
| HK1     | 12.0000 | 0.0090 | 0.3364 |
| DOK4    | 1.0000  | 0.0000 | 0.2438 |
| CEL     | 9.0000  | 0.0034 | 0.2737 |

---

---

|          |         |        |        |
|----------|---------|--------|--------|
| GABRQ    | 13.0000 | 0.0000 | 0.2151 |
| LCN2     | 10.0000 | 0.0005 | 0.3323 |
| OLFM4    | 7.0000  | 0.0001 | 0.2953 |
| UTS2R    | 12.0000 | 0.0005 | 0.3222 |
| SPAG5    | 11.0000 | 0.0000 | 0.2650 |
| CYP2A6   | 24.0000 | 0.0007 | 0.2788 |
| PLOD3    | 8.0000  | 0.0010 | 0.2425 |
| ARHGEF4  | 4.0000  | 0.0031 | 0.2560 |
| IFNB1    | 16.0000 | 0.0025 | 0.3380 |
| CYP2B6   | 36.0000 | 0.0065 | 0.3313 |
| OPTN     | 6.0000  | 0.0007 | 0.2981 |
| CYP2C8   | 30.0000 | 0.0019 | 0.3111 |
| PLD1     | 16.0000 | 0.0077 | 0.3335 |
| CYP2D6   | 15.0000 | 0.0006 | 0.2899 |
| SULT2A1  | 16.0000 | 0.0019 | 0.3237 |
| ENTPD1   | 11.0000 | 0.0041 | 0.2931 |
| HRC      | 15.0000 | 0.0002 | 0.3313 |
| C7       | 3.0000  | 0.0002 | 0.2751 |
| P4HA1    | 7.0000  | 0.0004 | 0.2472 |
| ARHGAP18 | 4.0000  | 0.0022 | 0.2568 |
| ZFP36    | 7.0000  | 0.0003 | 0.3260 |
| IRAK2    | 5.0000  | 0.0000 | 0.2878 |
| STS      | 19.0000 | 0.0069 | 0.2874 |
| SULT2B1  | 12.0000 | 0.0017 | 0.2742 |
| AOC3     | 5.0000  | 0.0011 | 0.2704 |
| ABCC1    | 2.0000  | 0.0000 | 0.3014 |
| ABCG2    | 19.0000 | 0.0139 | 0.3323 |

---

---

|         |         |        |        |
|---------|---------|--------|--------|
| GABRG3  | 12.0000 | 0.0000 | 0.2168 |
| HSD11B2 | 4.0000  | 0.0001 | 0.2851 |
| RHOV    | 6.0000  | 0.0014 | 0.3017 |
| ESRRA   | 7.0000  | 0.0011 | 0.2998 |
| TRAIP   | 7.0000  | 0.0000 | 0.2691 |
| LRP8    | 8.0000  | 0.0008 | 0.3137 |
| CYP26C1 | 14.0000 | 0.0003 | 0.2647 |
| COX7A1  | 10.0000 | 0.0000 | 0.2583 |
| GPBR1   | 24.0000 | 0.0018 | 0.3482 |
| DHFRL1  | 6.0000  | 0.0001 | 0.2663 |
| CTSB    | 5.0000  | 0.0001 | 0.3132 |
| MMRN1   | 16.0000 | 0.0000 | 0.3330 |
| GNAZ    | 11.0000 | 0.0037 | 0.3398 |
| WIPF3   | 1.0000  | 0.0000 | 0.2717 |
| MTNR1A  | 18.0000 | 0.0015 | 0.3138 |
| SLCO1A2 | 12.0000 | 0.0075 | 0.3098 |
| EBF1    | 8.0000  | 0.0002 | 0.2883 |
| PLD2    | 7.0000  | 0.0009 | 0.3126 |
| CFTR    | 16.0000 | 0.0184 | 0.3385 |
| GRIN3B  | 9.0000  | 0.0011 | 0.2748 |
| FARS2   | 4.0000  | 0.0002 | 0.2464 |
| CLEC5A  | 8.0000  | 0.0031 | 0.2719 |
| PHYH    | 1.0000  | 0.0000 | 0.2322 |
| NOC2L   | 4.0000  | 0.0035 | 0.2579 |
| HGS     | 8.0000  | 0.0011 | 0.3191 |
| EGLN2   | 2.0000  | 0.0000 | 0.2417 |
| EGLN3   | 6.0000  | 0.0050 | 0.2962 |

---

---

|          |         |        |        |
|----------|---------|--------|--------|
| CD177    | 7.0000  | 0.0000 | 0.2718 |
| RNASE3   | 10.0000 | 0.0036 | 0.2812 |
| PCGF3    | 2.0000  | 0.0000 | 0.2424 |
| SCML2    | 3.0000  | 0.0003 | 0.2652 |
| LGALS1   | 15.0000 | 0.0031 | 0.3298 |
| PRSS3P2  | 14.0000 | 0.0065 | 0.3079 |
| NCAN     | 3.0000  | 0.0011 | 0.2566 |
| CYP27B1  | 4.0000  | 0.0002 | 0.3053 |
| POLR2H   | 13.0000 | 0.0113 | 0.3192 |
| COL4A3   | 12.0000 | 0.0037 | 0.2751 |
| P2RY2    | 16.0000 | 0.0032 | 0.3394 |
| BBOX1    | 2.0000  | 0.0022 | 0.2268 |
| ARSI     | 2.0000  | 0.0000 | 0.2379 |
| CEP83    | 5.0000  | 0.0000 | 0.2897 |
| PHOSPHO1 | 3.0000  | 0.0004 | 0.2454 |
| LDHA     | 12.0000 | 0.0045 | 0.3270 |
| ANXA5    | 16.0000 | 0.0047 | 0.3525 |
| PTPRB    | 8.0000  | 0.0015 | 0.3117 |
| FSHR     | 11.0000 | 0.0009 | 0.3086 |
| FGF4     | 10.0000 | 0.0000 | 0.3102 |
| SHBG     | 8.0000  | 0.0001 | 0.3211 |
| LCT      | 7.0000  | 0.0062 | 0.2674 |
| GCK      | 8.0000  | 0.0015 | 0.2929 |
| GPBAR1   | 7.0000  | 0.0006 | 0.2957 |
| TAS1R2   | 17.0000 | 0.0000 | 0.3137 |
| ARSA     | 10.0000 | 0.0025 | 0.2839 |
| DUSP6    | 3.0000  | 0.0031 | 0.2877 |

---

---

|          |         |        |        |
|----------|---------|--------|--------|
| LEPREL1  | 6.0000  | 0.0006 | 0.2494 |
| HS3ST3A1 | 1.0000  | 0.0000 | 0.2512 |
| PTPN22   | 3.0000  | 0.0031 | 0.2549 |
| GAS2     | 5.0000  | 0.0124 | 0.2829 |
| ID1      | 4.0000  | 0.0005 | 0.2925 |
| IL22RA2  | 6.0000  | 0.0011 | 0.3003 |
| MCHR2    | 26.0000 | 0.0014 | 0.3342 |
| ESRRG    | 3.0000  | 0.0031 | 0.2674 |
| C8G      | 2.0000  | 0.0000 | 0.2634 |
| STAMPB   | 2.0000  | 0.0018 | 0.2872 |
| SEMA6B   | 2.0000  | 0.0008 | 0.2376 |
| PLXNC1   | 2.0000  | 0.0000 | 0.2084 |
| CTSH     | 7.0000  | 0.0013 | 0.2849 |
| S100A7   | 8.0000  | 0.0000 | 0.2772 |
| CCKAR    | 13.0000 | 0.0032 | 0.3270 |
| KLHL25   | 7.0000  | 0.0000 | 0.2691 |
| EPHA7    | 4.0000  | 0.0000 | 0.3044 |
| EPHA1    | 6.0000  | 0.0039 | 0.3107 |
| NNMT     | 2.0000  | 0.0000 | 0.2441 |
| BST1     | 10.0000 | 0.0067 | 0.2722 |
| SPON2    | 3.0000  | 0.0002 | 0.2727 |
| TPO      | 2.0000  | 0.0000 | 0.2490 |
| TYR      | 7.0000  | 0.0071 | 0.3203 |
| SLC6A4   | 6.0000  | 0.0017 | 0.2870 |
| MEPE     | 15.0000 | 0.0001 | 0.3306 |
| RAB26    | 1.0000  | 0.0000 | 0.6667 |
| PAPSS1   | 7.0000  | 0.0031 | 0.3138 |

---

---

|         |         |        |        |
|---------|---------|--------|--------|
| HIVEP3  | 5.0000  | 0.0031 | 0.2943 |
| COL20A1 | 9.0000  | 0.0001 | 0.2433 |
| STC2    | 14.0000 | 0.0000 | 0.3296 |
| IL4I1   | 11.0000 | 0.0048 | 0.2846 |
| LEPREL2 | 5.0000  | 0.0000 | 0.2423 |
| CYP2U1  | 11.0000 | 0.0000 | 0.2913 |
| TRIM17  | 3.0000  | 0.0032 | 0.1974 |
| CEP70   | 6.0000  | 0.0000 | 0.2908 |
| SEMA5A  | 3.0000  | 0.0023 | 0.2568 |
| NR2F1   | 6.0000  | 0.0001 | 0.3069 |
| SYT5    | 3.0000  | 0.0092 | 0.2429 |
| KRT80   | 1.0000  | 0.0000 | 1.0000 |
| KRT79   | 1.0000  | 0.0000 | 1.0000 |
| ZNF521  | 6.0000  | 0.0002 | 0.2901 |
| RNF217  | 7.0000  | 0.0000 | 0.2691 |
| SPDYA   | 2.0000  | 0.0031 | 0.2596 |
| UCK2    | 2.0000  | 0.0001 | 0.2351 |
| GNMT    | 4.0000  | 0.0021 | 0.2535 |
| ART4    | 2.0000  | 0.0000 | 0.2141 |
| ABCC2   | 14.0000 | 0.0011 | 0.2727 |
| SPTB    | 1.0000  | 0.0000 | 0.1888 |
| SCN1A   | 6.0000  | 0.0062 | 0.2326 |
| LIPG    | 6.0000  | 0.0010 | 0.2696 |
| STON2   | 5.0000  | 0.0000 | 0.2947 |
| GAS2L1  | 1.0000  | 0.0000 | 0.1809 |
| RASL10A | 2.0000  | 0.0031 | 0.2207 |
| CD1D    | 3.0000  | 0.0001 | 0.3071 |

---

---

|         |         |        |        |
|---------|---------|--------|--------|
| CTSL    | 4.0000  | 0.0003 | 0.3041 |
| B4GALT1 | 2.0000  | 0.0004 | 0.2278 |
| EGR3    | 1.0000  | 0.0000 | 0.1784 |
| SLCO4C1 | 10.0000 | 0.0036 | 0.2759 |
| TOP2B   | 4.0000  | 0.0002 | 0.2653 |
| ABLIM2  | 1.0000  | 0.0000 | 0.3005 |
| DIEXF   | 3.0000  | 0.0002 | 0.2120 |
| RPP25   | 2.0000  | 0.0000 | 0.2059 |
| TDRKH   | 1.0000  | 0.0000 | 0.2818 |
| BHMT    | 3.0000  | 0.0004 | 0.2278 |
| MIF     | 4.0000  | 0.0023 | 0.3096 |
| PDE3A   | 5.0000  | 0.0001 | 0.2667 |
| FOLR2   | 2.0000  | 0.0000 | 0.2141 |
| MED9    | 7.0000  | 0.0000 | 0.2859 |
| ACHE    | 5.0000  | 0.0036 | 0.3177 |
| RGSL1   | 1.0000  | 0.0000 | 0.2537 |
| HINT1   | 4.0000  | 0.0005 | 0.2527 |
| PPAP2B  | 6.0000  | 0.0013 | 0.2749 |
| CDCA2   | 8.0000  | 0.0000 | 0.2637 |
| TLR5    | 8.0000  | 0.0001 | 0.3107 |
| GADD45G | 1.0000  | 0.0000 | 0.2594 |
| FST     | 2.0000  | 0.0031 | 0.2298 |
| CHRD    | 1.0000  | 0.0000 | 0.1869 |
| NKG7    | 3.0000  | 0.0002 | 0.2626 |
| PLA2G1B | 17.0000 | 0.0057 | 0.3298 |
| LSS     | 3.0000  | 0.0016 | 0.2443 |
| HMGCR   | 3.0000  | 0.0002 | 0.2299 |

---

---

|          |         |        |        |
|----------|---------|--------|--------|
| MAPK8IP1 | 4.0000  | 0.0001 | 0.3234 |
| KCNMA1   | 8.0000  | 0.0040 | 0.2533 |
| RTP4     | 3.0000  | 0.0000 | 0.2308 |
| PRLR     | 5.0000  | 0.0000 | 0.3053 |
| SLC2A1   | 10.0000 | 0.0084 | 0.3184 |
| ABCB1    | 20.0000 | 0.0143 | 0.3456 |
| MMRN2    | 3.0000  | 0.0031 | 0.2239 |
| CLEC14A  | 3.0000  | 0.0047 | 0.2779 |
| CTDSPL   | 3.0000  | 0.0031 | 0.2401 |
| CTDSP1   | 1.0000  | 0.0000 | 0.1937 |
| PRSS1    | 5.0000  | 0.0007 | 0.2860 |
| APC2     | 1.0000  | 0.0000 | 0.2039 |
| SLC24A5  | 2.0000  | 0.0001 | 0.2480 |
| GABRD    | 13.0000 | 0.0023 | 0.2299 |
| SLC22A7  | 8.0000  | 0.0008 | 0.2595 |
| SLC22A8  | 12.0000 | 0.0049 | 0.2738 |
| ATP1A2   | 3.0000  | 0.0010 | 0.1973 |
| GSTA1    | 18.0000 | 0.0002 | 0.2813 |
| PLTP     | 4.0000  | 0.0004 | 0.2989 |
| PLA2G2A  | 14.0000 | 0.0011 | 0.3096 |
| P2RX4    | 2.0000  | 0.0000 | 0.2721 |
| CPB1     | 5.0000  | 0.0014 | 0.2657 |
| SOAT1    | 4.0000  | 0.0000 | 0.2330 |
| GABRG1   | 15.0000 | 0.0061 | 0.2606 |
| BATF     | 3.0000  | 0.0000 | 0.2961 |
| KCNA3    | 4.0000  | 0.0004 | 0.2713 |
| PRKAB1   | 2.0000  | 0.0005 | 0.2544 |

---



---

|          |         |        |        |
|----------|---------|--------|--------|
| ESRRB    | 1.0000  | 0.0000 | 0.2654 |
| SERPINA6 | 4.0000  | 0.0000 | 0.3071 |
| MB       | 3.0000  | 0.0000 | 0.3047 |
| ATP1A1   | 4.0000  | 0.0040 | 0.2190 |
| SOAT2    | 4.0000  | 0.0000 | 0.2330 |
| CTRB1    | 4.0000  | 0.0009 | 0.2267 |
| ATP1A3   | 2.0000  | 0.0000 | 0.1831 |
| SLCO1B3  | 9.0000  | 0.0005 | 0.2810 |
| GABRE    | 9.0000  | 0.0000 | 0.2153 |
| SIRT5    | 5.0000  | 0.0004 | 0.3099 |
| VKORC1L1 | 2.0000  | 0.0006 | 0.2435 |
| AMY1A    | 5.0000  | 0.0004 | 0.2280 |
| RMDN3    | 1.0000  | 0.0000 | 0.2609 |
| ARC      | 4.0000  | 0.0000 | 0.2930 |
| KCNK5    | 2.0000  | 0.0003 | 0.2482 |
| AMY2B    | 6.0000  | 0.0010 | 0.2208 |
| TYRO3    | 1.0000  | 0.0000 | 0.2528 |
| AMY2A    | 6.0000  | 0.0024 | 0.2476 |
| BRMS1L   | 2.0000  | 0.0000 | 0.2473 |
| QRSL1    | 2.0000  | 0.0000 | 0.2433 |
| ACSBG1   | 3.0000  | 0.0000 | 0.2591 |
| MUC1     | 13.0000 | 0.0095 | 0.3410 |
| LGALS3   | 5.0000  | 0.0001 | 0.3080 |
| RBPJL    | 1.0000  | 0.0000 | 0.2397 |
| ABO      | 2.0000  | 0.0002 | 0.2743 |
| KCNA5    | 4.0000  | 0.0021 | 0.2823 |
| KCNA4    | 4.0000  | 0.0025 | 0.2634 |

---

---

|                 |         |        |        |
|-----------------|---------|--------|--------|
| SCD             | 4.0000  | 0.0022 | 0.2859 |
| GAMT            | 3.0000  | 0.0003 | 0.2179 |
| GLRA3           | 4.0000  | 0.0064 | 0.2619 |
| PLA2G2E         | 13.0000 | 0.0007 | 0.3013 |
| UBD             | 2.0000  | 0.0001 | 0.2351 |
| PDE5A           | 7.0000  | 0.0064 | 0.2937 |
| LYVE1           | 3.0000  | 0.0000 | 0.2977 |
| ART1            | 1.0000  | 0.0000 | 0.2502 |
| SIGMAR1         | 2.0000  | 0.0004 | 0.2205 |
| KCNA1           | 8.0000  | 0.0113 | 0.2851 |
| MBL2            | 4.0000  | 0.0003 | 0.3026 |
| NR4A2           | 2.0000  | 0.0031 | 0.2813 |
| KCNA10          | 1.0000  | 0.0000 | 0.2220 |
| C1S             | 2.0000  | 0.0000 | 0.2629 |
| MAP2            | 8.0000  | 0.0049 | 0.3325 |
| CUBN            | 1.0000  | 0.0000 | 0.2937 |
| FECH            | 3.0000  | 0.0002 | 0.2862 |
| VSNL1           | 3.0000  | 0.0062 | 0.2114 |
| KCND1           | 1.0000  | 0.0000 | 0.1746 |
| RAD54L2         | 1.0000  | 0.0000 | 0.2825 |
| ASTN1           | 2.0000  | 0.0031 | 0.1916 |
| MAP6            | 1.0000  | 0.0000 | 0.1608 |
| ENSG00000258947 | 1.0000  | 0.0000 | 0.2496 |
| AKAP12          | 3.0000  | 0.0025 | 0.3131 |
| KCND2           | 4.0000  | 0.0094 | 0.2675 |
| HAVCR2          | 3.0000  | 0.0003 | 0.2882 |
| BCHE            | 5.0000  | 0.0009 | 0.3239 |

---

---

|          |         |        |        |
|----------|---------|--------|--------|
| WNT2     | 3.0000  | 0.0000 | 0.3066 |
| NQO1     | 11.0000 | 0.0028 | 0.3170 |
| KCND3    | 3.0000  | 0.0000 | 0.2424 |
| SLC6A9   | 2.0000  | 0.0031 | 0.2077 |
| SLC12A2  | 1.0000  | 0.0000 | 0.2530 |
| NUDT9    | 3.0000  | 0.0000 | 0.2129 |
| OGFOD1   | 3.0000  | 0.0033 | 0.2456 |
| OGFOD2   | 3.0000  | 0.0031 | 0.2050 |
| SCARF1   | 1.0000  | 0.0000 | 0.2432 |
| SLC22A11 | 3.0000  | 0.0006 | 0.2558 |
| GPNMB    | 1.0000  | 0.0000 | 0.2607 |
| HLX      | 1.0000  | 0.0000 | 0.2111 |
| LYPLAL1  | 3.0000  | 0.0002 | 0.2330 |
| MAN2C1   | 1.0000  | 0.0000 | 1.0000 |
| MAN1B1   | 1.0000  | 0.0000 | 1.0000 |
| TMLHE    | 1.0000  | 0.0000 | 0.1649 |
| ANG      | 4.0000  | 0.0068 | 0.2980 |
| NCEH1    | 1.0000  | 0.0000 | 0.2017 |
| NMT2     | 1.0000  | 0.0000 | 0.2782 |
| RNASE1   | 4.0000  | 0.0005 | 0.3028 |
| PCLO     | 2.0000  | 0.0000 | 0.1638 |
| GABRP    | 10.0000 | 0.0000 | 0.2147 |
| ORAI1    | 1.0000  | 0.0000 | 0.2422 |
| KCNB1    | 1.0000  | 0.0000 | 0.3005 |
| PADI4    | 1.0000  | 0.0000 | 0.2032 |
| SLCO2B1  | 7.0000  | 0.0004 | 0.2685 |
| UGT3A1   | 1.0000  | 0.0000 | 0.2366 |

---

---

|         |        |        |        |
|---------|--------|--------|--------|
| RPAP1   | 1.0000 | 0.0000 | 0.2260 |
| SLC15A1 | 4.0000 | 0.0000 | 0.2386 |
| SIGLEC1 | 1.0000 | 0.0000 | 0.2544 |
| CMA1    | 1.0000 | 0.0000 | 0.2777 |
| SLC26A2 | 1.0000 | 0.0000 | 0.2390 |
| RNF150  | 1.0000 | 0.0000 | 0.1784 |
| TREML1  | 2.0000 | 0.0031 | 0.2617 |
| MSRA    | 2.0000 | 0.0019 | 0.2770 |
| PTGR1   | 1.0000 | 0.0000 | 0.2364 |
| SLC22A6 | 6.0000 | 0.0001 | 0.2565 |
| KCNC1   | 1.0000 | 0.0000 | 0.1746 |
| CELA1   | 1.0000 | 0.0000 | 0.2618 |
| SLC5A2  | 2.0000 | 0.0000 | 0.2417 |
| SLC16A7 | 2.0000 | 0.0000 | 0.2417 |
| PLAGL1  | 2.0000 | 0.0000 | 0.2417 |
| SLC16A1 | 2.0000 | 0.0000 | 0.2575 |
| EPB41L3 | 1.0000 | 0.0000 | 0.2144 |
| PMP22   | 2.0000 | 0.0031 | 0.2207 |
| PRX     | 1.0000 | 0.0000 | 0.1809 |
| FAM25A  | 1.0000 | 0.0000 | 0.1830 |
| NPPB    | 1.0000 | 0.0000 | 0.2777 |
| MTTP    | 2.0000 | 0.0000 | 0.2617 |
| EFTUD1  | 1.0000 | 0.0000 | 0.1951 |
| SLCO1C1 | 2.0000 | 0.0000 | 0.2190 |
| SLC23A1 | 1.0000 | 0.0000 | 0.2111 |
| NQO2    | 2.0000 | 0.0000 | 0.2412 |
| RFX2    | 1.0000 | 0.0000 | 0.2149 |

---

---

|         |        |        |        |
|---------|--------|--------|--------|
| TRIM13  | 2.0000 | 0.0002 | 0.2824 |
| TREML4  | 1.0000 | 0.0000 | 0.2075 |
| PCDH15  | 2.0000 | 0.0003 | 0.2824 |
| ATP2B2  | 2.0000 | 0.0001 | 0.2586 |
| RERG    | 1.0000 | 0.0000 | 0.2235 |
| MEST    | 2.0000 | 0.0000 | 0.2417 |
| PI4K2B  | 1.0000 | 0.0000 | 0.2778 |
| KCNB2   | 1.0000 | 0.0000 | 0.2100 |
| CBLN2   | 1.0000 | 0.0000 | 0.2196 |
| HSPB6   | 2.0000 | 0.0031 | 0.2821 |
| SETDB2  | 3.0000 | 0.0000 | 0.1954 |
| SLCO4A1 | 3.0000 | 0.0000 | 0.2191 |
| SLCO6A1 | 1.0000 | 0.0000 | 0.1721 |
| ECE2    | 1.0000 | 0.0000 | 0.2777 |
| EHD2    | 1.0000 | 0.0000 | 0.2062 |
| CAMK1   | 1.0000 | 0.0000 | 0.2022 |
| CA2     | 3.0000 | 0.0031 | 0.2682 |
| PKIA    | 2.0000 | 0.0062 | 0.2368 |
| ACKR4   | 1.0000 | 0.0000 | 0.2605 |
| NANP    | 1.0000 | 0.0000 | 0.2201 |
| PIM1    | 2.0000 | 0.0000 | 0.2777 |
| ADAD1   | 1.0000 | 0.0000 | 0.2481 |
| SCHIP1  | 1.0000 | 0.0000 | 1.0000 |
| NRGN    | 1.0000 | 0.0000 | 1.0000 |
| CHL1    | 1.0000 | 0.0000 | 0.2488 |
| METRN   | 1.0000 | 0.0000 | 0.2286 |
| CLC     | 1.0000 | 0.0000 | 0.2196 |

---

---

|         |        |        |        |
|---------|--------|--------|--------|
| AQP3    | 1.0000 | 0.0000 | 0.2874 |
| PAM     | 1.0000 | 0.0000 | 0.2704 |
| CA4     | 1.0000 | 0.0000 | 0.2869 |
| MAST2   | 1.0000 | 0.0000 | 0.2275 |
| RORA    | 1.0000 | 0.0000 | 0.2654 |
| OBSL1   | 1.0000 | 0.0000 | 0.2257 |
| TNMD    | 1.0000 | 0.0000 | 0.2408 |
| CD300LB | 1.0000 | 0.0000 | 0.2138 |
| LHFP    | 1.0000 | 0.0000 | 0.2101 |
| SYTL4   | 1.0000 | 0.0000 | 0.2465 |
| CD101   | 1.0000 | 0.0000 | 0.2455 |
| MRVI1   | 1.0000 | 0.0000 | 0.2115 |
| ANGPTL2 | 1.0000 | 0.0000 | 0.2966 |
| RTCB    | 1.0000 | 0.0000 | 0.2424 |
| P4HTM   | 1.0000 | 0.0000 | 0.1702 |

---

**Table S7 The chemical profiling of Baihu-Guizhi Decoction (BHGZD) using UFLC-Q-TOF-MS/MS system**

| <b>Bioactive compounds (BACs)</b> | <b>Cas No.</b> | <b>Molecular formula</b>                        | <b>Molecular Weight/Da</b> | <b>t<sub>R</sub> (min)</b> | <b>Negative ion mode</b> | <b>Error (ppm)</b> | <b>Positive ion mode</b> | <b>Error (ppm)</b> | <b>Herbs</b>                         |
|-----------------------------------|----------------|-------------------------------------------------|----------------------------|----------------------------|--------------------------|--------------------|--------------------------|--------------------|--------------------------------------|
| citric acid                       | 77-92-9        | C <sub>6</sub> H <sub>8</sub> O <sub>7</sub>    | 192.03                     | 1.5                        | 191.02                   | 4.2                | —                        | —                  | <i>Glycyrrhizae Radix et Rhizoma</i> |
| *neomangiferin                    | 64809-67-2     | C <sub>25</sub> H <sub>28</sub> O <sub>16</sub> | 584.14                     | 4.97                       | 583.13                   | -0.2               | 585.15                   | 0.7                | <i>Anemarrhenae Rhizoma</i>          |
| *mangiferin                       | 4773-96-0      | C <sub>19</sub> H <sub>18</sub> O <sub>11</sub> | 422.08                     | 7.13                       | 421.08                   | 0.3                | 423.09                   | 0.9                | <i>Anemarrhenae Rhizoma</i>          |
| schaftoside                       | 51938-32-0     | C <sub>26</sub> H <sub>28</sub> O <sub>14</sub> | 564.15                     | 9.79                       | —                        | —                  | 565.16                   | 1.7                | <i>Glycyrrhizae Radix et Rhizoma</i> |
| *isoschaftoside                   | 52012-29-0     | C <sub>26</sub> H <sub>28</sub> O <sub>14</sub> | 564.15                     | 10.47                      | 563.14                   | 1                  | 565.16                   | 1.7                | <i>Glycyrrhizae Radix et Rhizoma</i> |
| *7-O-methyl mangiferin            | 31002-12-7     | C <sub>20</sub> H <sub>20</sub> O <sub>11</sub> | 436.1                      | 10.7                       | 435.09                   | 0.9                | 437.11                   | 0.9                | <i>Anemarrhenae Rhizoma</i>          |
| liquiritin                        | 551-15-5       | C <sub>21</sub> H <sub>22</sub> O <sub>9</sub>  | 418.13                     | 11.16                      | 417.12                   | 1                  | —                        | —                  | <i>Glycyrrhizae Radix et Rhizoma</i> |
| *vitexin                          | 3681-93-4      | C <sub>21</sub> H <sub>20</sub> O <sub>10</sub> | 432.11                     | 11.31                      | 431.1                    | -0.3               | 433.11                   | 0.5                | <i>Anemarrhenae Rhizoma</i>          |
| *isovitexin                       | 29702-25-8     | C <sub>21</sub> H <sub>20</sub> O <sub>10</sub> | 432.11                     | 11.56                      | 431.1                    | 0.6                | 433.11                   | 0.5                | <i>Anemarrhenae Rhizoma</i>          |
| liquiritin apioside               | 199796-12-8    | C <sub>26</sub> H <sub>30</sub> O <sub>13</sub> | 550.17                     | 11.58                      | 549.16                   | 0.1                | 551.18                   | 1.8                | <i>Glycyrrhizae Radix et Rhizoma</i> |
| hydroxygenkwanin                  | 20243-59-8     | C <sub>16</sub> H <sub>12</sub> O <sub>6</sub>  | 300.06                     | 13.98                      | 299.06                   | 0.7                | —                        | —                  | NA                                   |
| *isoliquiritin apioside           | 120926-46-7    | C <sub>26</sub> H <sub>30</sub> O <sub>13</sub> | 550.17                     | 16.74                      | 549.16                   | 0.1                | 551.18                   | 1.8                | <i>Glycyrrhizae Radix et Rhizoma</i> |
| Glycyroside                       | 125310-04-5    | C <sub>27</sub> H <sub>30</sub> O <sub>13</sub> | 562.17                     | 16.82                      | —                        | —                  | 563.18                   | 1.5                | <i>Glycyrrhizae Radix et Rhizoma</i> |

|                             |                          |                                                 |        |       |        |      |        |      |                                      |
|-----------------------------|--------------------------|-------------------------------------------------|--------|-------|--------|------|--------|------|--------------------------------------|
| *isoliquiritin              | 5041-81-6                | C <sub>21</sub> H <sub>22</sub> O <sub>9</sub>  | 418.13 | 16.96 | 417.12 | 1    | 419.13 | -0.1 | <i>Glycyrrhizae Radix et Rhizoma</i> |
| ononin                      | 486-62-4                 | C <sub>22</sub> H <sub>22</sub> O <sub>9</sub>  | 430.13 | 17.08 | —      | —    | 431.13 | 0.4  | <i>Glycyrrhizae Radix et Rhizoma</i> |
| officinalisinin I           | 57944-18-0               | C <sub>45</sub> H <sub>76</sub> O <sub>19</sub> | 920.5  | 17.26 | —      | —    | 921.5  | -7.3 | <i>Anemarrhenae Rhizoma</i>          |
| *liquiritigenin             | 578-86-9                 | C <sub>15</sub> H <sub>12</sub> O <sub>4</sub>  | 256.07 | 17.29 | 255.07 | 0.8  | —      | —    | <i>Glycyrrhizae Radix et Rhizoma</i> |
| anemarsaponin E             | 136565-73-6              | C <sub>45</sub> H <sub>76</sub> O <sub>20</sub> | 936.49 | 17.32 | 935.49 | -0.1 | —      | —    | <i>Anemarrhenae Rhizoma</i>          |
| neoisoliquiritin            | 7014-39-<br>3/59122-93-9 | C <sub>21</sub> H <sub>22</sub> O <sub>9</sub>  | 418.13 | 17.81 | 417.12 | 1    | 419.13 | -0.1 | <i>Glycyrrhizae Radix et Rhizoma</i> |
| cinnamic acid               | 621-82-9/140-<br>10-3    | C <sub>9</sub> H <sub>8</sub> O <sub>2</sub>    | 148.05 | 18.6  | —      | —    | 149.06 | -2.6 | <i>Cinnamomi Ramulus</i>             |
| xilingsaponin B             | 256642-89-4              | C <sub>45</sub> H <sub>74</sub> O <sub>18</sub> | 902.49 | 20.76 | —      | —    | 903.5  | 2.5  | <i>Anemarrhenae Rhizoma</i>          |
| *timosaponin BII            | 136656-07-0              | C <sub>45</sub> H <sub>76</sub> O <sub>19</sub> | 920.5  | 20.77 | 919.49 | 1    | —      | —    | <i>Anemarrhenae Rhizoma</i>          |
| timosaponin D               | 220095-97-6              | C <sub>45</sub> H <sub>74</sub> O <sub>19</sub> | 918.48 | 23.04 | 917.48 | 1.7  | 919.49 | 3.4  | <i>Anemarrhenae Rhizoma</i>          |
| isoliquiritigenin           | 961-29-5                 | C <sub>15</sub> H <sub>12</sub> O <sub>4</sub>  | 256.07 | 25.94 | 255.07 | 0.8  | —      | —    | <i>Glycyrrhizae Radix et Rhizoma</i> |
| *formononetin               | 485-72-3                 | C <sub>16</sub> H <sub>12</sub> O <sub>4</sub>  | 268.07 | 26.55 | 267.07 | 3.4  | 269.08 | 0    | <i>Glycyrrhizae Radix et Rhizoma</i> |
| pseudoprototimosaponin AIII | 142759-74-8              | C <sub>45</sub> H <sub>74</sub> O <sub>18</sub> | 902.49 | 27.18 | 901.48 | 1.1  | 903.5  | 2.5  | <i>Anemarrhenae Rhizoma</i>          |



|                                       |             |                                                 |        |       |        |     |        |     |                                      |
|---------------------------------------|-------------|-------------------------------------------------|--------|-------|--------|-----|--------|-----|--------------------------------------|
| glabrolide                            | 10401-33-9  | C <sub>30</sub> H <sub>44</sub> O <sub>4</sub>  | 468.32 | 29.56 | —      | —   | 469.33 | 0.7 | <i>Glycyrrhizae Radix et Rhizoma</i> |
| *anemarrhensaponin<br>I               | 163047-21-0 | C <sub>39</sub> H <sub>66</sub> O <sub>14</sub> | 758.45 | 31.61 | 757.44 | 0.6 | —      | —   | <i>Anemarrhenae Rhizoma</i>          |
| glycyrrhetic acid 3-O-<br>glucuronide | 34096-83-8  | C <sub>36</sub> H <sub>54</sub> O <sub>10</sub> | 646.37 | 31.74 | —      | —   | 647.38 | 1.1 | <i>Glycyrrhizae Radix et Rhizoma</i> |
| *glycyrrhizic acid                    | 1405-86-3   | C <sub>42</sub> H <sub>62</sub> O <sub>16</sub> | 822.4  | 31.78 | 821.4  | 0.8 | 823.41 | 3.3 | <i>Glycyrrhizae Radix et Rhizoma</i> |
| timosaponin A II                      | 117210-12-5 | C <sub>39</sub> H <sub>64</sub> O <sub>14</sub> | 756.43 | 36.6  | 755.42 | 1.3 | 757.44 | 2   | <i>Anemarrhenae Rhizoma</i>          |
| timosaponin A IV                      | 942621-71-8 | C <sub>39</sub> H <sub>64</sub> O <sub>13</sub> | 740.43 | 40.08 | 739.43 | 1   | —      | —   | <i>Anemarrhenae Rhizoma</i>          |

\*Quantitative bioactive compounds (BACs)

**Table S8 13 chemical compounds were quantitatively determined using UFLC-Q-TOF-MS/MS system**

| Bioactive compounds (ng/mL) | Time      |         |           |          |          |          |         |        |
|-----------------------------|-----------|---------|-----------|----------|----------|----------|---------|--------|
|                             | 30min     | 1h      | 2h        | 4h       | 6h       | 8h       | 12h     | 24h    |
| timosaponin B II            | 170964.00 | 652.22  | 62955.68  | 1051.32  | 29345.93 | 1214.54  | —       | —      |
| mangiferin                  | 149928.80 | 3113.73 | 249631.85 | 14345.01 | 74135.91 | 18821.78 | 8535.02 | —      |
| glycyrrhizic acid           | 43346.92  | 331.02  | 12301.35  | 2002.37  | 3882.31  | 3036.35  | 2253.26 | 145.49 |
| neomangiferin               | 17115.79  | —       | —         | —        | —        | 54.54    | 36.61   | —      |
| 7-O-methyl mangiferin       | 7683.26   | 527.96  | 22650.62  | 2471.67  | 29457.59 | 3495.38  | 1854.79 | —      |
| anemarrhensaponin I         | 6903.70   | —       | 2311.89   | —        | 790.29   | —        | —       | —      |
| vitexin                     | 1265.33   | —       | —         | —        | —        | —        | —       | —      |
| formononetin                | 523.60    | —       | —         | —        | —        | —        | —       | —      |
| liquiritigenin              | 188.15    | 10.05   | 97.25     | 24.13    | 60.18    | 56.51    | —       | —      |
| isoliquiritin               | 177.85    | —       | —         | —        | 160.76   | —        | —       | —      |
| isoliquiritin apioside      | 166.88    | —       | 205.44    | —        | 174.09   | —        | —       | —      |
| isoschaftoside              | 123.12    | —       | 183.21    | —        | 172.01   | 19.86    | —       | —      |

---

|            |       |   |   |   |   |   |   |   |   |
|------------|-------|---|---|---|---|---|---|---|---|
| isovitexin | 74.17 | — | — | — | — | — | — | — | — |
|------------|-------|---|---|---|---|---|---|---|---|

---

**Table S9 The absorption distribution metabolism excretion (ADME) information on 19 bioactive compounds (BACs) included in Baihu-Guizhi Decoction (BHGZD)**

| Bioactive compounds | CAS No.           | ADMET Absorption Level | ADMET BBB Level | ADME T BBB | ADMET Solubility | ADMET Solubility Level | ADMET Hepatotoxicit | ADMET Hepatotoxicity Probability | ADMET CYP2D6 | ADMET CYP2D6 Probability | ADMET PPB Level | Druglikeness Weight | Druglikene ss Grading | Source     | Herbs                                |
|---------------------|-------------------|------------------------|-----------------|------------|------------------|------------------------|---------------------|----------------------------------|--------------|--------------------------|-----------------|---------------------|-----------------------|------------|--------------------------------------|
| formononetin        | 485-72-3          | 0                      | 2               | -0.234     | -3.564           | 3                      | 1                   | 0.986                            | 1            | 0.693                    | 1               | 0.909               | Good                  | ETCM       | <i>Glycyrrhizae Radix et Rhizoma</i> |
| liquiritigenin      | 578-86-9          | 0                      | 2               | -0.419     | -3.234           | 3                      | 1                   | 0.986                            | 0            | 0.257                    | 2               | 0.823               | Good                  | ETCM       | <i>Glycyrrhizae Radix et Rhizoma</i> |
| hydroxygenkwanin    | 20243-59-8        | 0                      | 3               | -0.959     | -3.211           | 3                      | 1                   | 0.966                            | 1            | 0.594                    | 2               | 0.737               | Good                  | ETCM       | NA                                   |
| cinnamic acid       | 621-82-9/140-10-3 | 0                      | 2               | -0.161     | -1.867           | 4                      | 0                   | 0.178                            | 0            | 0.029                    | 2               | 0.65                | Moderate              | ETCM       | <i>Cinnamomi Ramulus</i>             |
| isoliquiritigenin   | 961-29-5          | 0                      | 2               | -0.496     | -2.736           | 3                      | 1                   | 0.927                            | 0            | 0.376                    | 2               | 0.582               | Moderate              | ETCM       | <i>Glycyrrhizae Radix et Rhizoma</i> |
| ononin              | 486-62-4          | 1                      | 4               |            | -2.291           | 3                      | TRUE                | NA                               | FALSE        | NA                       | FALSE           | 0.54                | NA                    | Prediction | <i>Glycyrrhizae Radix et Rhizoma</i> |
| glabrolide          | 10401-33-9        | 0                      | 1               | 0.416      | -7.427           | 1                      | FALSE               | NA                               | FALSE        | NA                       | TRUE            | 0.5                 | Moderate              | Prediction | <i>Glycyrrhizae Radix et Rhizoma</i> |
| liquiritin          | 551-15-5          | 2                      | 4               | Undefined  | -2.432           | 3                      | 1                   | 0.854                            | 1            | 0.623                    | 2               | 0.484               | Weak                  | ETCM       | <i>Glycyrrhizae Radix et Rhizoma</i> |
| citric acid         | 77-92-9           | 2                      | 4               | Undefined  | 0.981            | 5                      | 0                   | 0.006                            | 0            | 0.059                    | 0               | 0.397               | Weak                  | ETCM       | <i>Glycyrrhizae Radix et Rhizoma</i> |
| vitexin             | 3681-93-4         | 3                      | 4               | Undefined  | -2.746           | 3                      | 1                   | 0.933                            | 1            | 0.653                    | 2               | 0.35                | Weak                  | ETCM       | <i>Anemarrhenae Rhizoma</i>          |

|                                   |             |   |   |           |        |   |       |       |       |       |       |       |      |            |                                      |
|-----------------------------------|-------------|---|---|-----------|--------|---|-------|-------|-------|-------|-------|-------|------|------------|--------------------------------------|
| isovitexin                        | 29702-25-8  | 3 | 4 | Undefined | -2.659 | 3 | 1     | 0.933 | 1     | 0.574 | 2     | 0.35  | Weak | ETCM       | <i>Anemarrhenae Rhizoma</i>          |
| 7-O-methyl mangiferin             | 31002-12-7  | 3 | 4 |           | -3.169 | 3 | TRUE  | NA    | FALSE | NA    | FALSE | 0.339 | NA   | Prediction | <i>Anemarrhenae Rhizoma</i>          |
| isoliquiritin                     | 5041-81-6   | 3 | 4 | Undefined | -2.288 | 3 | 1     | 0.854 | 0     | 0.277 | 0     | 0.298 | Weak | ETCM       | <i>Glycyrrhizae Radix et Rhizoma</i> |
| neoisoliquiritin                  | 59122-93-9  | 3 | 4 | Undefined | -2.311 | 3 | 1     | 0.841 | 0     | 0.237 | 0     | 0.298 | Weak | ETCM       | <i>Glycyrrhizae Radix et Rhizoma</i> |
| mangiferin                        | 4773-96-0   | 3 | 4 | Undefined | -3.291 | 3 | 1     | 0.887 | 0     | 0.495 | 2     | 0.293 | Weak | ETCM       | <i>Anemarrhenae Rhizoma</i>          |
| glycyrrhetic acid 3-O-glucuronide | 34096-83-8  | 3 | 4 |           | -5.986 | 2 | FALSE | NA    | FALSE | NA    | TRUE  | 0.281 | NA   | Prediction | <i>Glycyrrhizae Radix et Rhizoma</i> |
| Glycoside                         | 125310-04-5 | 3 | 4 |           | -2.504 | 3 | TRUE  | NA    | FALSE | NA    | FALSE | 0.236 | NA   | Prediction | <i>Glycyrrhizae Radix et Rhizoma</i> |
| liquiritin apioside               | 74639-14-8  | 3 | 4 |           | -3.037 | 3 | TRUE  | NA    | FALSE | NA    | FALSE | 0.228 | NA   | Prediction | <i>Glycyrrhizae Radix et Rhizoma</i> |
| isoschaftoside                    | 52012-29-0  | 3 | 4 | Undefined | -4.499 | 2 | 1     | 0.86  | 0     | 0.277 | 0     | 0.196 | Weak | ETCM       | <i>Glycyrrhizae Radix et Rhizoma</i> |
| schaftoside                       | 51938-32-0  | 3 | 4 | Undefined | -6.145 | 1 | 1     | 0.98  | 0     | 0.267 | 2     | 0.183 | Weak | ETCM       | <i>Glycyrrhizae Radix et Rhizoma</i> |
| neomangiferin                     | 64809-67-2  | 3 | 4 |           | -6.016 | 1 | TRUE  | NA    | FALSE | NA    | FALSE | 0.176 | NA   | Prediction | <i>Anemarrhenae Rhizoma</i>          |
| timosaponin A II                  | 117210-12-5 | 0 | 0 | 0.97      | -7.533 | 1 | FALSE | NA    | FALSE | NA    | FALSE | 0.161 | NA   | Prediction | <i>Anemarrhenae Rhizoma</i>          |
| anemarrhensaponin I               | 163047-21-0 | 3 | 4 | Undefined | -4.236 | 2 | 0     | 0.052 | 0     | 0.346 | 0     | 0.149 | Weak | ETCM       | <i>Anemarrhenae Rhizoma</i>          |

|                           |             |   |   |           |        |   |       |       |       |       |       |       |      |            |                                      |
|---------------------------|-------------|---|---|-----------|--------|---|-------|-------|-------|-------|-------|-------|------|------------|--------------------------------------|
| isoliquiritin apioside    | 120926-46-7 | 3 | 4 |           | -3.176 | 3 | TRUE  | NA    | FALSE | NA    | FALSE | 0.148 | NA   | Prediction | <i>Glycyrrhizae Radix et Rhizoma</i> |
| timosaponin A IV          | 942621-71-8 | 2 | 0 | 1.66      | -9.093 | 0 | TRUE  | NA    | FALSE | NA    | FALSE | 0.139 | NA   | Prediction | <i>Anemarrhenae Rhizoma</i>          |
| glycyrrhizic acid         | 1405-86-3   | 3 | 4 | Undefined | -6.703 | 1 | 1     | 0.675 | 0     | 0.277 | 0     | 0.135 | Weak | ETCM       | <i>Glycyrrhizae Radix et Rhizoma</i> |
| xilingsaponin B           | N/A         | 3 | 4 | Undefined | -4.661 | 2 | 0     | 0.066 | 0     | 0.128 | 0     | 0.132 | Weak | ETCM       | <i>Anemarrhenae Rhizoma</i>          |
| pseudoprotimosaponin AIII | 142759-74-8 | 3 | 4 |           | -3.933 | 3 | FALSE | NA    | FALSE | NA    | FALSE | 0.106 | NA   | Prediction | <i>Anemarrhenae Rhizoma</i>          |
| officinalisinin I         | 57944-18-0  | 3 | 4 |           | -4.728 | 2 | FALSE | NA    | FALSE | NA    | FALSE | 0.097 | NA   | Prediction | <i>Anemarrhenae Rhizoma</i>          |
| timosaponin BII           | 136656-07-0 | 3 | 4 | Undefined | -4.728 | 2 | 0     | 0.059 | 0     | 0.128 | 0     | 0.097 | Weak | ETCM       | <i>Anemarrhenae Rhizoma</i>          |
| anemarsaponin E           | 136565-73-6 | 3 | 4 | Undefined | -3.978 | 3 | 0     | 0.086 | 0     | 0.128 | 0     | 0.096 | Weak | ETCM       | <i>Anemarrhenae Rhizoma</i>          |
| timosaponin D             | N/A         | 3 | 4 |           | -4.612 | 2 | FALSE |       | FALSE |       | FALSE | 0.096 |      | Prediction | <i>Anemarrhenae Rhizoma</i>          |

**Table S10 Molecular docking results by Autodock Vina**

| <b>Proteins</b> | <b>Herbs</b>                         | <b>Bioactive compounds</b> | <b>Binding Affinity (kcal/mol)</b> |
|-----------------|--------------------------------------|----------------------------|------------------------------------|
| AKT1            | <i>Glycyrrhizae Radix et Rhizoma</i> | Citric acid                | -4.3                               |
| NFKB1           | <i>Cinnamomi Ramulus</i>             | Cinnamic acid              | -4.5                               |
| NFKB1           | <i>Glycyrrhizae Radix et Rhizoma</i> | Citric acid                | -4.6                               |
| TLR4            | <i>Glycyrrhizae Radix et Rhizoma</i> | Citric acid                | -4.7                               |
| AKT1            | <i>Cinnamomi Ramulus</i>             | Cinnamic acid              | -4.8                               |
| TLR4            | <i>Cinnamomi Ramulus</i>             | Cinnamic acid              | -5.8                               |
| NFKB1           | <i>Glycyrrhizae Radix et Rhizoma</i> | Liquiritigenin             | -5.8                               |
| NFKB1           | <i>Anemarrhenae Rhizoma</i>          | Mangiferin                 | -5.8                               |
| AKT1            | <i>Glycyrrhizae Radix et Rhizoma</i> | Formononetin               | -5.9                               |
| AKT1            | <i>Glycyrrhizae Radix et Rhizoma</i> | Isoliquiritigenin          | -5.9                               |
| NFKB1           | <i>Glycyrrhizae Radix et Rhizoma</i> | Isoliquiritigenin          | -6.0                               |
| AKT1            | <i>Glycyrrhizae Radix et Rhizoma</i> | Liquiritigenin             | -6.1                               |
| NFKB1           | <i>Glycyrrhizae Radix et Rhizoma</i> | Formononetin               | -6.3                               |
| NFKB1           | <i>Anemarrhenae Rhizoma</i>          | Vitexin                    | -6.5                               |
| TLR4            | <i>Glycyrrhizae Radix et Rhizoma</i> | Formononetin               | -6.6                               |
| AKT1            | <i>Anemarrhenae Rhizoma</i>          | Mangiferin                 | -6.6                               |
| AKT1            | <i>Glycyrrhizae Radix et Rhizoma</i> | Schaftoside                | -6.7                               |
| TLR4            | <i>Glycyrrhizae Radix et Rhizoma</i> | Liquiritigenin             | -6.8                               |
| TLR4            | <i>Glycyrrhizae Radix et Rhizoma</i> | Isoliquiritigenin          | -6.9                               |
| TLR4            | <i>Anemarrhenae Rhizoma</i>          | Mangiferin                 | -6.9                               |
| NFKB1           | <i>Glycyrrhizae Radix et Rhizoma</i> | Schaftoside                | -6.9                               |
| AKT1            | <i>Anemarrhenae Rhizoma</i>          | Vitexin                    | -6.9                               |
| TLR4            | <i>Glycyrrhizae Radix et Rhizoma</i> | Schaftoside                | -7.0                               |
| TLR4            | <i>Glycyrrhizae Radix et Rhizoma</i> | Glycyrrhizic acid          | -7.2                               |

---

|          |                                      |                   |       |
|----------|--------------------------------------|-------------------|-------|
| TLR4     | <i>Anemarrhenae Rhizoma</i>          | Vitexin           | -7.2  |
| AKT1     | <i>Glycyrrhizae Radix et Rhizoma</i> | Glycyrrhizic acid | -7.5  |
| NFKB1    | <i>Glycyrrhizae Radix et Rhizoma</i> | Glycyrrhizic acid | -7.7  |
| NLRP3    | <i>Cinnamomi Ramulus</i>             | Cinnamic acid     | -6.4  |
| NLRP3    | <i>Anemarrhenae Rhizoma</i>          | Mangiferin        | -8.5  |
| NLRP3    | <i>Glycyrrhizae Radix et Rhizoma</i> | Glycyrrhizic acid | -13.9 |
| NFkB_p65 | <i>Cinnamomi Ramulus</i>             | Cinnamic acid     | -5.3  |
| NFkB_p65 | <i>Anemarrhenae Rhizoma</i>          | Mangiferin        | -7.7  |
| NFkB_p65 | <i>Glycyrrhizae Radix et Rhizoma</i> | Glycyrrhizic acid | -12.2 |

---



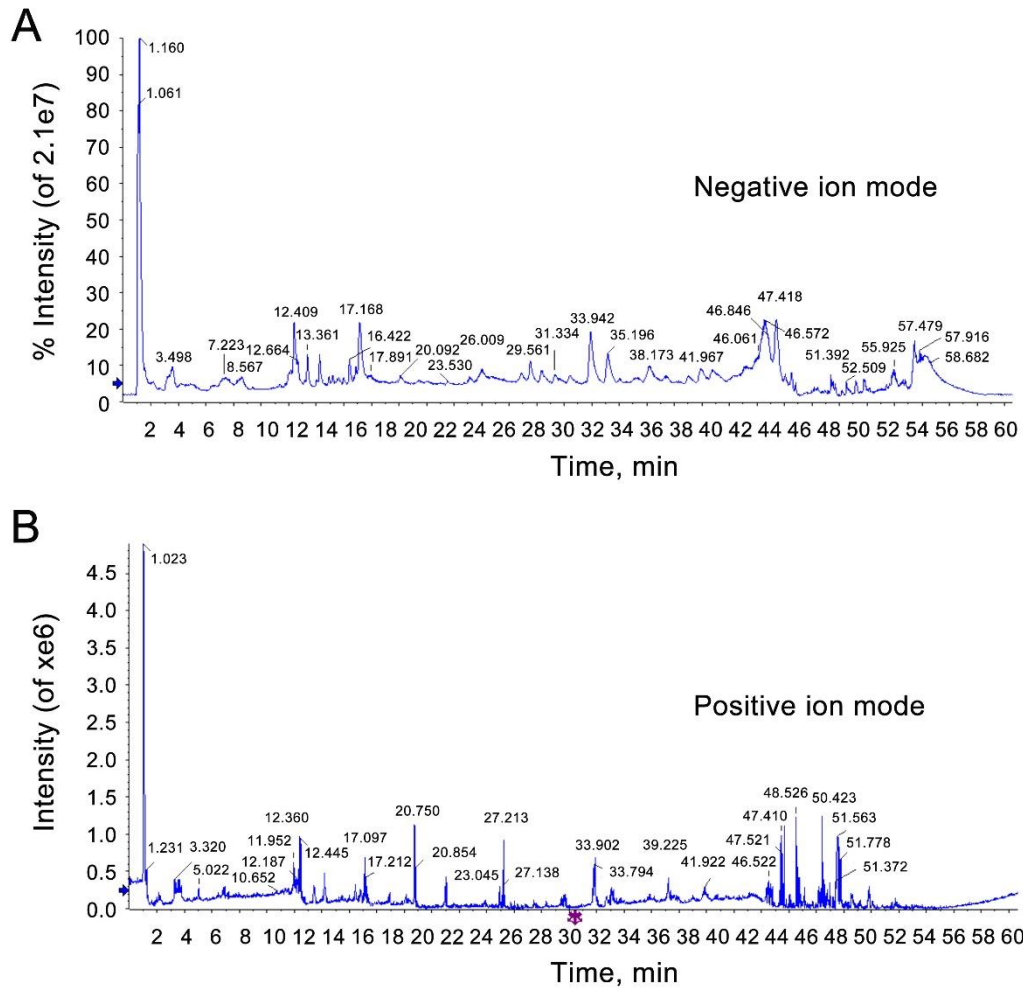

**Figure S1** Total ion chromatogram for sera in normal control group after the treatment of Baihu-Guizhi decoction (BHGZD) by UHPLC-QTRAP-MS/MS system. (A) Negative ion mode. (B) Positive ion mode.

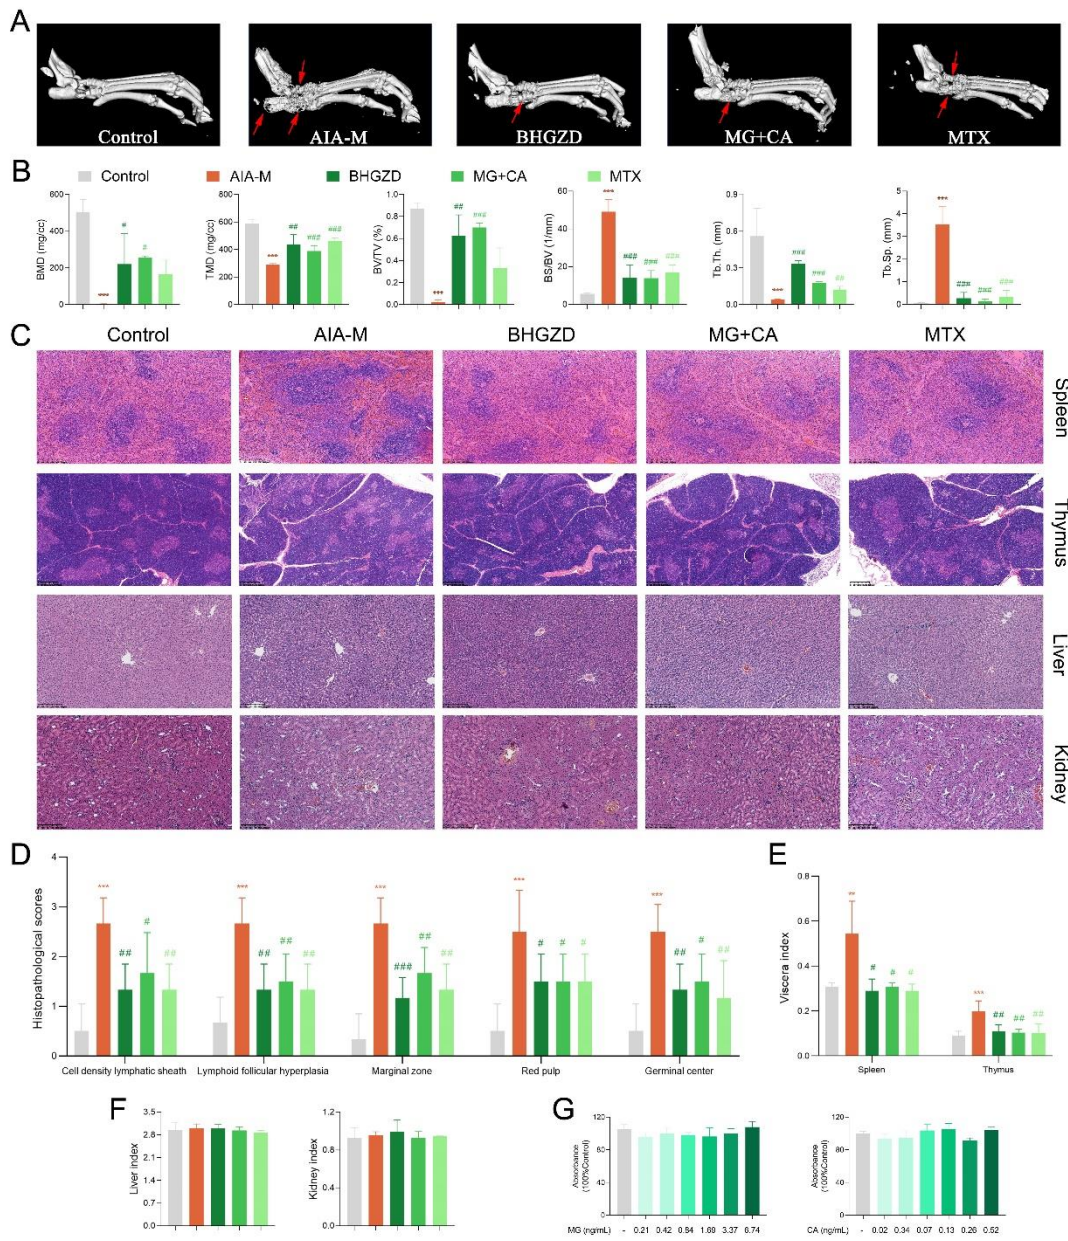

**Figure S2 Micro-computed tomography (micro-CT) analysis and pathological changes in the liver, kidney, spleen, and thymus of different groups using hematoxylin and eosin (H&E) staining based on AIA-M rats. And the cell viability on Raw264.7 cells with the treatment of MG and CA tested using cell counting kit-8 (CCK8) assay. (A)** Representative micro-CT images of ankle joints showing bone erosion levels in different groups (The red arrow indicates the position of the bone destruction). **(B)** Quantitative micro-CT analysis of bone mineral density (BMD), tissue mineral density (TMD), bone volume/tissue volume (BV/TV), bone surface density (BS/BV), trabecular separation (Tb.Sp), trabecular thickness (Tb.Th). **(C)** Pathological changes in the liver, kidney, spleen and thymus of AIA-M rats using H&E. **(D)** Histopathological scores in cell density lymphatic sheath, lymphoid follicular hyperplasia, marginal zone, red pulp, and germinal center. **(E)** Spleen and thymus indexes in AIA-M rats. **(F)** Liver and kidney indexes in AIA-M rats. **(G)** The cell viabilities on Raw264.7 cells with the treatment of MG/CA were test using CCK8 assay. Data are expressed as the mean±S.D. \*\*, \*\*\*, p<0.01, p<0.001, respectively, comparison with normal control group; #, ##, ###, p<0.05, p<0.01, p<0.001, respectively, comparison with AIA-M model group.

## References:

1. Li W, Mao X, Wang X, Liu Y, Wang K, Li C, et al. Disease-Modifying Anti-Rheumatic Drug Prescription Baihu-Guizhi Decoction Attenuates Rheumatoid Arthritis Via Suppressing Toll-Like Receptor 4-Mediated Nlrp3 Inflammasome Activation. *Frontiers in pharmacology* (2021) 12:743086. Epub 2021/10/23. doi: 10.3389/fphar.2021.743086.
2. Li W, Mao X, Wu H, Guo M, Su X, Lu J, et al. Deciphering the Chemical Profile and Pharmacological Mechanisms of Baihu-Guizhi Decoction Using Ultra-Fast Liquid Chromatography-Quadrupole-Time-of-Flight Tandem Mass Spectrometry Coupled with Network Pharmacology-Based Investigation. *Phytomedicine : international journal of phytotherapy and phytopharmacology* (2020) 67:153156. Epub 2020/01/07. doi: 10.1016/j.phymed.2019.153156.
3. Mao X, Li W, Chen W, Li Y, Wang Q, Wang X, et al. Exploring and Characterizing a Novel Combination of Paeoniflorin and Talatizidine for the Treatment of Rheumatoid Arthritis. *Pharmacol Res* (2020) 153:104658. Epub 2020/02/01. doi: 10.1016/j.phrs.2020.104658.
4. Dixon WJ. Efficient Analysis of Experimental Observations. *Annu Rev Pharmacol Toxicol* (1980) 20:441-62. Epub 1980/01/01. doi: 10.1146/annurev.pa.20.040180.002301.
5. Wang C, Kong X, Zhu C, Liu C, Sun D, Xu Q, et al. Wu-Tou Decoction Attenuates Neuropathic Pain Via Suppressing Spinal Astrocytic Il-1r1/Traf6/Jnk Signaling. *Oncotarget* (2017) 8(54):92864-79. Epub 2017/12/02. doi: 10.18632/oncotarget.21638.
6. Yoon C, Wook YY, Sik NH, Ho KS, Mo CJ. Behavioral Signs of Ongoing Pain and Cold Allodynia in a Rat Model of Neuropathic Pain. *Pain* (1994)

- 59(3):369-76. Epub 1994/12/01. doi: 10.1016/0304-3959(94)90023-X.
7. Hargreaves K, Dubner R, Brown F, Flores C, Joris J. A New and Sensitive Method for Measuring Thermal Nociception in Cutaneous Hyperalgesia. *Pain* (1988) 32(1):77-88. Epub 1988/01/01. doi: 10.1016/0304-3959(88)90026-7.
8. Wang Y, Liu Z, Li C, Li D, Ouyang Y, Yu J, et al. Drug Target Prediction Based on the Herbs Components: The Study on the Multitargets Pharmacological Mechanism of Qishenkeli Acting on the Coronary Heart Disease. *Evid Based Complement Alternat Med* (2012) 2012:698531. Epub 2012/04/05. doi: 10.1155/2012/698531.
9. He Y, Su W, Chen T, Zeng X, Yan Z, Guo J, et al. Identification of Prototype Compounds and Derived Metabolites of Naoxintong Capsule in Beagle Dog Urine and Feces by Uflc-Q-Tof-Ms/Ms. *Journal of pharmaceutical and biomedical analysis* (2019) 176:112806. Epub 2019/08/20. doi: 10.1016/j.jpba.2019.112806.
10. Huang CF, Chen L, Li YC, Wu L, Yu GT, Zhang WF, et al. Nlrp3 Inflammasome Activation Promotes Inflammation-Induced Carcinogenesis in Head and Neck Squamous Cell Carcinoma. *J Exp Clin Cancer Res* (2017) 36(1):116. Epub 2017/09/04. doi: 10.1186/s13046-017-0589-y.
11. Zhao LR, Xing RL, Wang PM, Zhang NS, Yin SJ, Li XC, et al. Nlrp1 and Nlrp3 Inflammasomes Mediate Lps/Atp-Induced Pyroptosis in Knee Osteoarthritis. *Molecular Medicine Reports* (2018) 17(4):5463-9. doi: 10.3892/mmr.2018.8520.
